# Supplementary material for: A population-based resource for intergenerational metabolomics analyses in pregnant women and their children: the Generation R Study
Source: PubMed Central journal article supplement (PMC7089886; doi:10.1007/s11306-020-01667-1), 2020-03-23

# Mother early pregnancy – PC 1 Loadings

0.2  
0.1  
0.0  
-0.1  
-0.2

Ala  
Arg  
Asn  
Asp  
Cys  
Gln  
Glu  
His  
Ile  
Leu  
Lys  
Met  
Orn  
Phe  
Pro  
Ser  
Thr  
Tyr  
Val  
NEFA\_14\_0  
NEFA\_14\_1  
NEFA\_16\_0  
NEFA\_16\_1  
NEFA\_16\_2  
NEFA\_16\_3  
NEFA\_17\_0  
NEFA\_17\_1  
NEFA\_17\_2  
NEFA\_18\_0  
NEFA\_18\_1  
NEFA\_18\_2  
NEFA\_18\_3  
NEFA\_19\_0  
NEFA\_19\_1  
NEFA\_20\_1  
NEFA\_20\_2  
NEFA\_20\_3  
NEFA\_20\_4  
NEFA\_21\_0  
NEFA\_21\_1  
NEFA\_21\_2  
NEFA\_21\_3  
NEFA\_21\_4  
NEFA\_21\_5  
NEFA\_21\_6  
NEFA\_24\_0  
NEFA\_24\_1  
NEFA\_24\_2  
NEFA\_24\_3  
NEFA\_24\_4  
NEFA\_24\_5  
NEFA\_26\_0  
NEFA\_26\_1  
PC\_aa.C30.0  
PC\_aa.C30.3  
PC\_aa.C32.0  
PC\_aa.C32.1  
PC\_aa.C32.2  
PC\_aa.C32.3  
PC\_aa.C34.1  
PC\_aa.C34.2  
PC\_aa.C34.3  
PC\_aa.C34.4  
PC\_aa.C36.0  
PC\_aa.C36.1  
PC\_aa.C36.2  
PC\_aa.C36.3  
PC\_aa.C36.4  
PC\_aa.C36.6  
PC\_aa.C36.8  
PC\_aa.C38.0  
PC\_aa.C38.2  
PC\_aa.C38.3  
PC\_aa.C38.4  
PC\_aa.C38.5  
PC\_aa.C38.6  
PC\_aa.C40.0  
PC\_aa.C40.2  
PC\_aa.C40.3  
PC\_aa.C40.4  
PC\_aa.C40.5  
PC\_aa.C40.6  
PC\_aa.C42.0  
PC\_aa.C42.3  
PC\_aa.C42.6  
PC\_aa.C44.2  
PC\_ae.C30.0  
PC\_ae.C32.0  
PC\_ae.C32.1  
PC\_ae.C32.2  
PC\_ae.C34.0  
PC\_ae.C34.2  
PC\_ae.C34.3  
PC\_ae.C34.4  
PC\_ae.C36.0  
PC\_ae.C36.2  
PC\_ae.C36.4  
PC\_ae.C36.5  
PC\_ae.C38.0  
PC\_ae.C38.2  
PC\_ae.C38.3  
PC\_ae.C38.4  
PC\_ae.C38.5  
PC\_ae.C38.6  
PC\_ae.C40.0  
PC\_ae.C40.2  
PC\_ae.C40.3  
PC\_ae.C40.4  
PC\_ae.C40.5  
PC\_ae.C42.0  
PC\_ae.C42.3  
PC\_ae.C42.4  
PC\_ae.C42.5  
PC\_ae.C42.6  
lyso.PC.a.C14.0  
lyso.PC.a.C16.0  
lyso.PC.a.C18.0  
lyso.PC.a.C18.1  
lyso.PC.a.C18.2  
lyso.PC.a.C18.3  
lyso.PC.a.C20.3  
lyso.PC.a.C20.4  
lyso.PC.a.C22.0  
lyso.PC.a.C22.2  
lyso.PC.a.C24.0  
SM.a.C30.1  
SM.a.C32.1  
SM.a.C32.2  
SM.a.C34.1  
SM.a.C34.2  
SM.a.C35.0  
SM.a.C35.1  
SM.a.C36.1  
SM.a.C36.2  
SM.a.C37.0  
SM.a.C38.2  
SM.a.C38.3  
SM.a.C39.1  
SM.a.C39.2  
SM.a.C40.2  
SM.a.C41.0  
SM.a.C41.1  
SM.a.C41.2  
SM.a.C42.1  
SM.a.C42.2  
SM.a.C42.3  
SM.a.C42.4  
SM.a.C42.6  
SM.a.C43.2  
SM.a.C44.6  
SM.e.C36.2  
SM.e.C38.3  
SM.e.C40.5  
Free Carn  
Carn.a.C2.0  
Carn.a.C3.0  
Carn.a.C4.0  
Carn.a.C5.0  
Carn.a.C6.0  
Carn.a.C6.OH  
Carn.a.C8.0  
Carn.a.C8.1  
Carn.a.C8.2  
Carn.a.C10.0  
Carn.a.C10.1  
Carn.a.C12.0  
Carn.a.C14.1  
Carn.a.C14.2  
Carn.a.C16.0  
Carn.a.C16.Ox  
Carn.a.C16.1  
Carn.a.C16.2  
Carn.a.C18.0  
Carn.a.C18.1  
Carn.a.C18.2  
Carn.a.C20.1  
Carn.a.C20.3  
Carn.a.C20.4

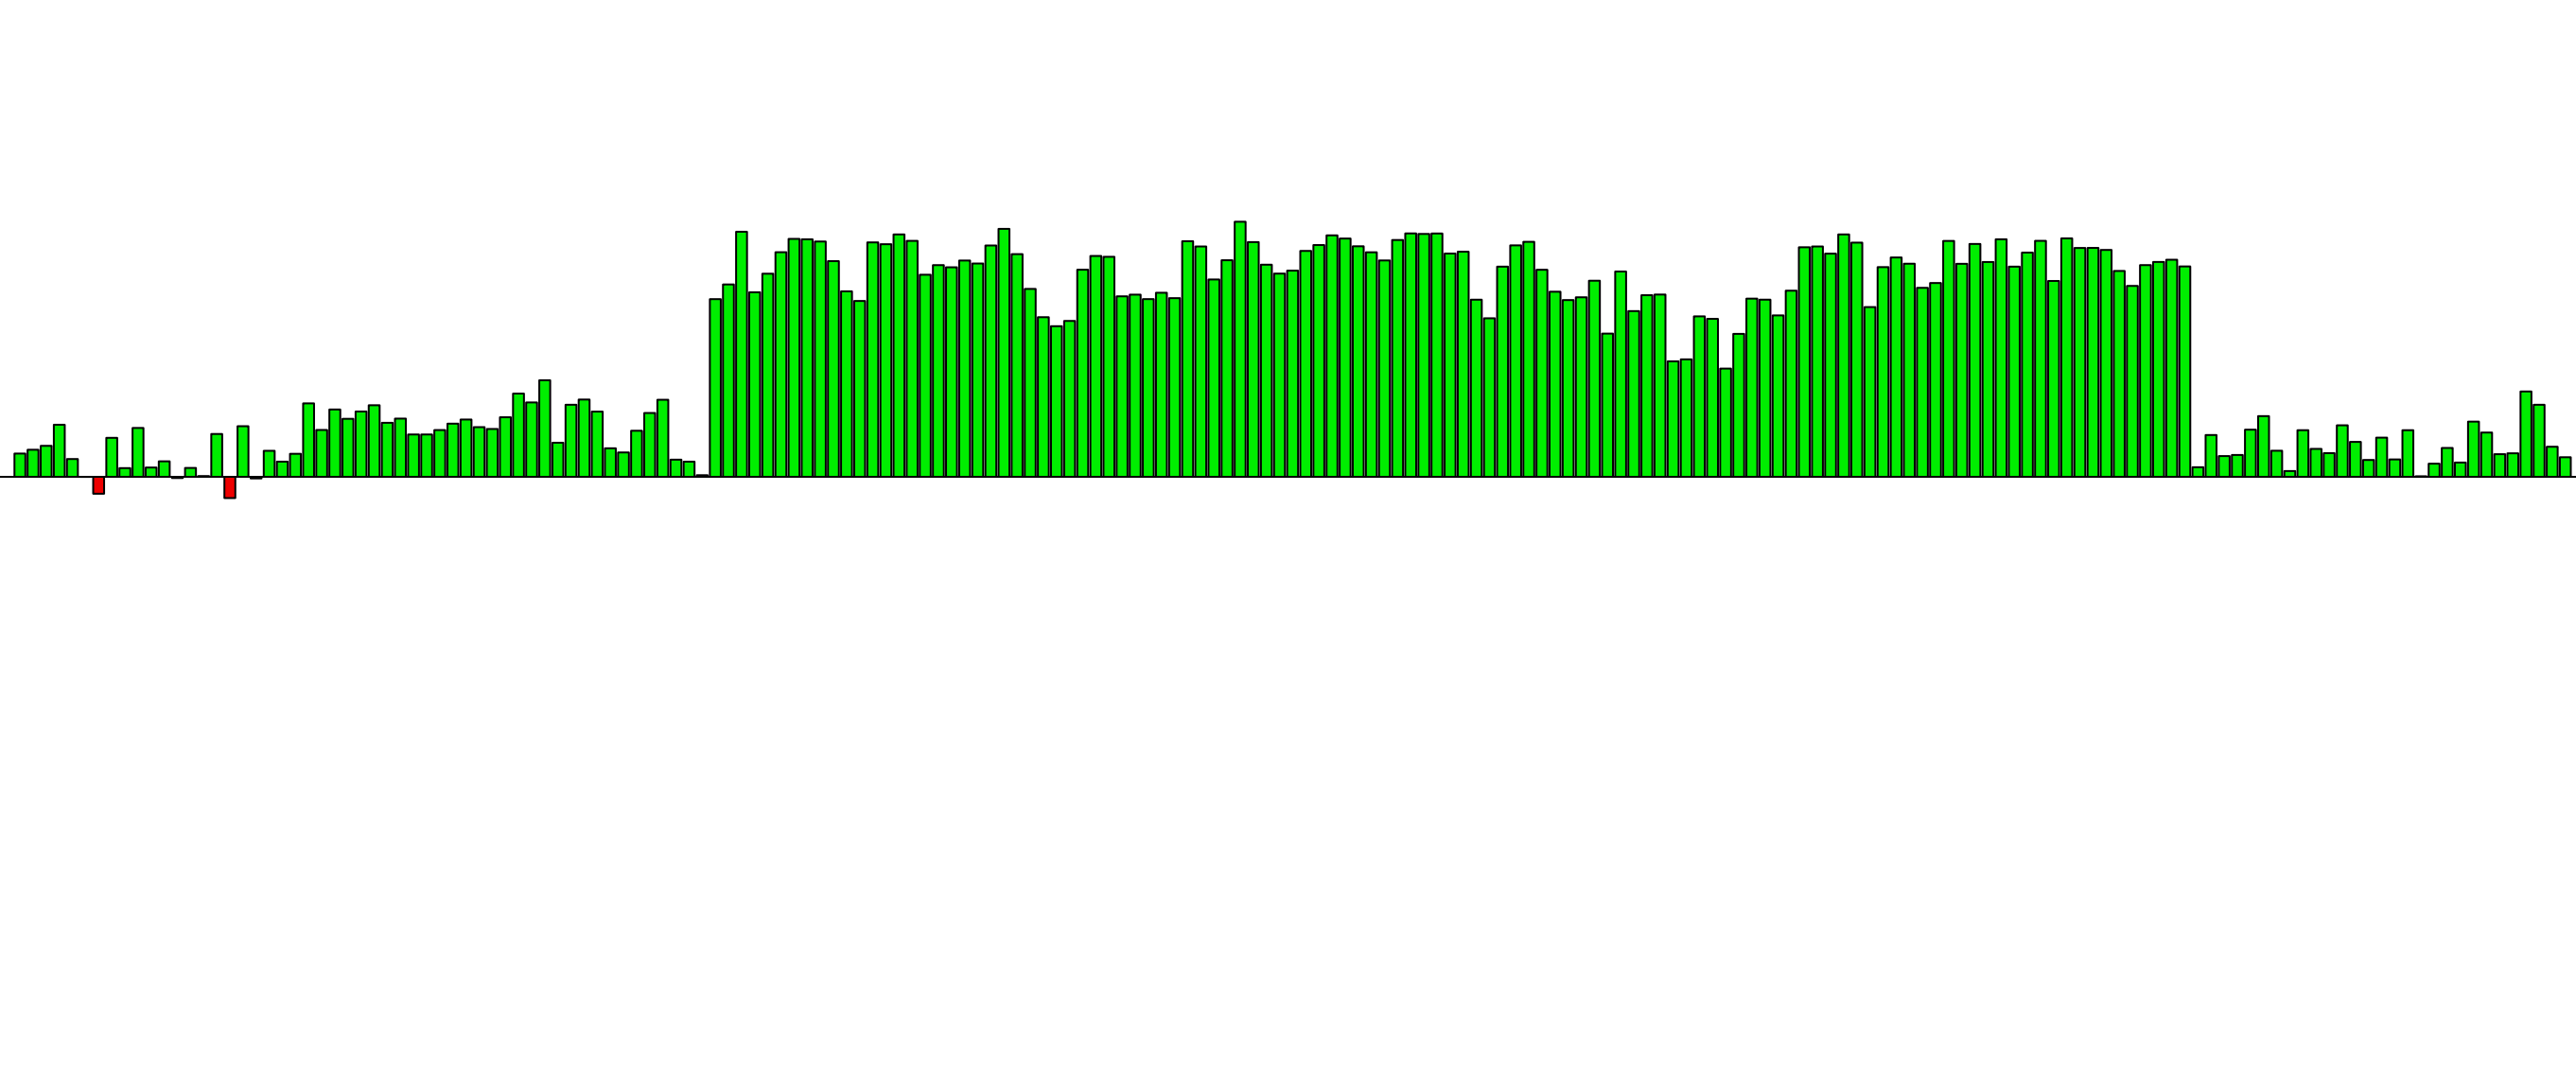

### Mother early pregnancy – PC 2 Loadings

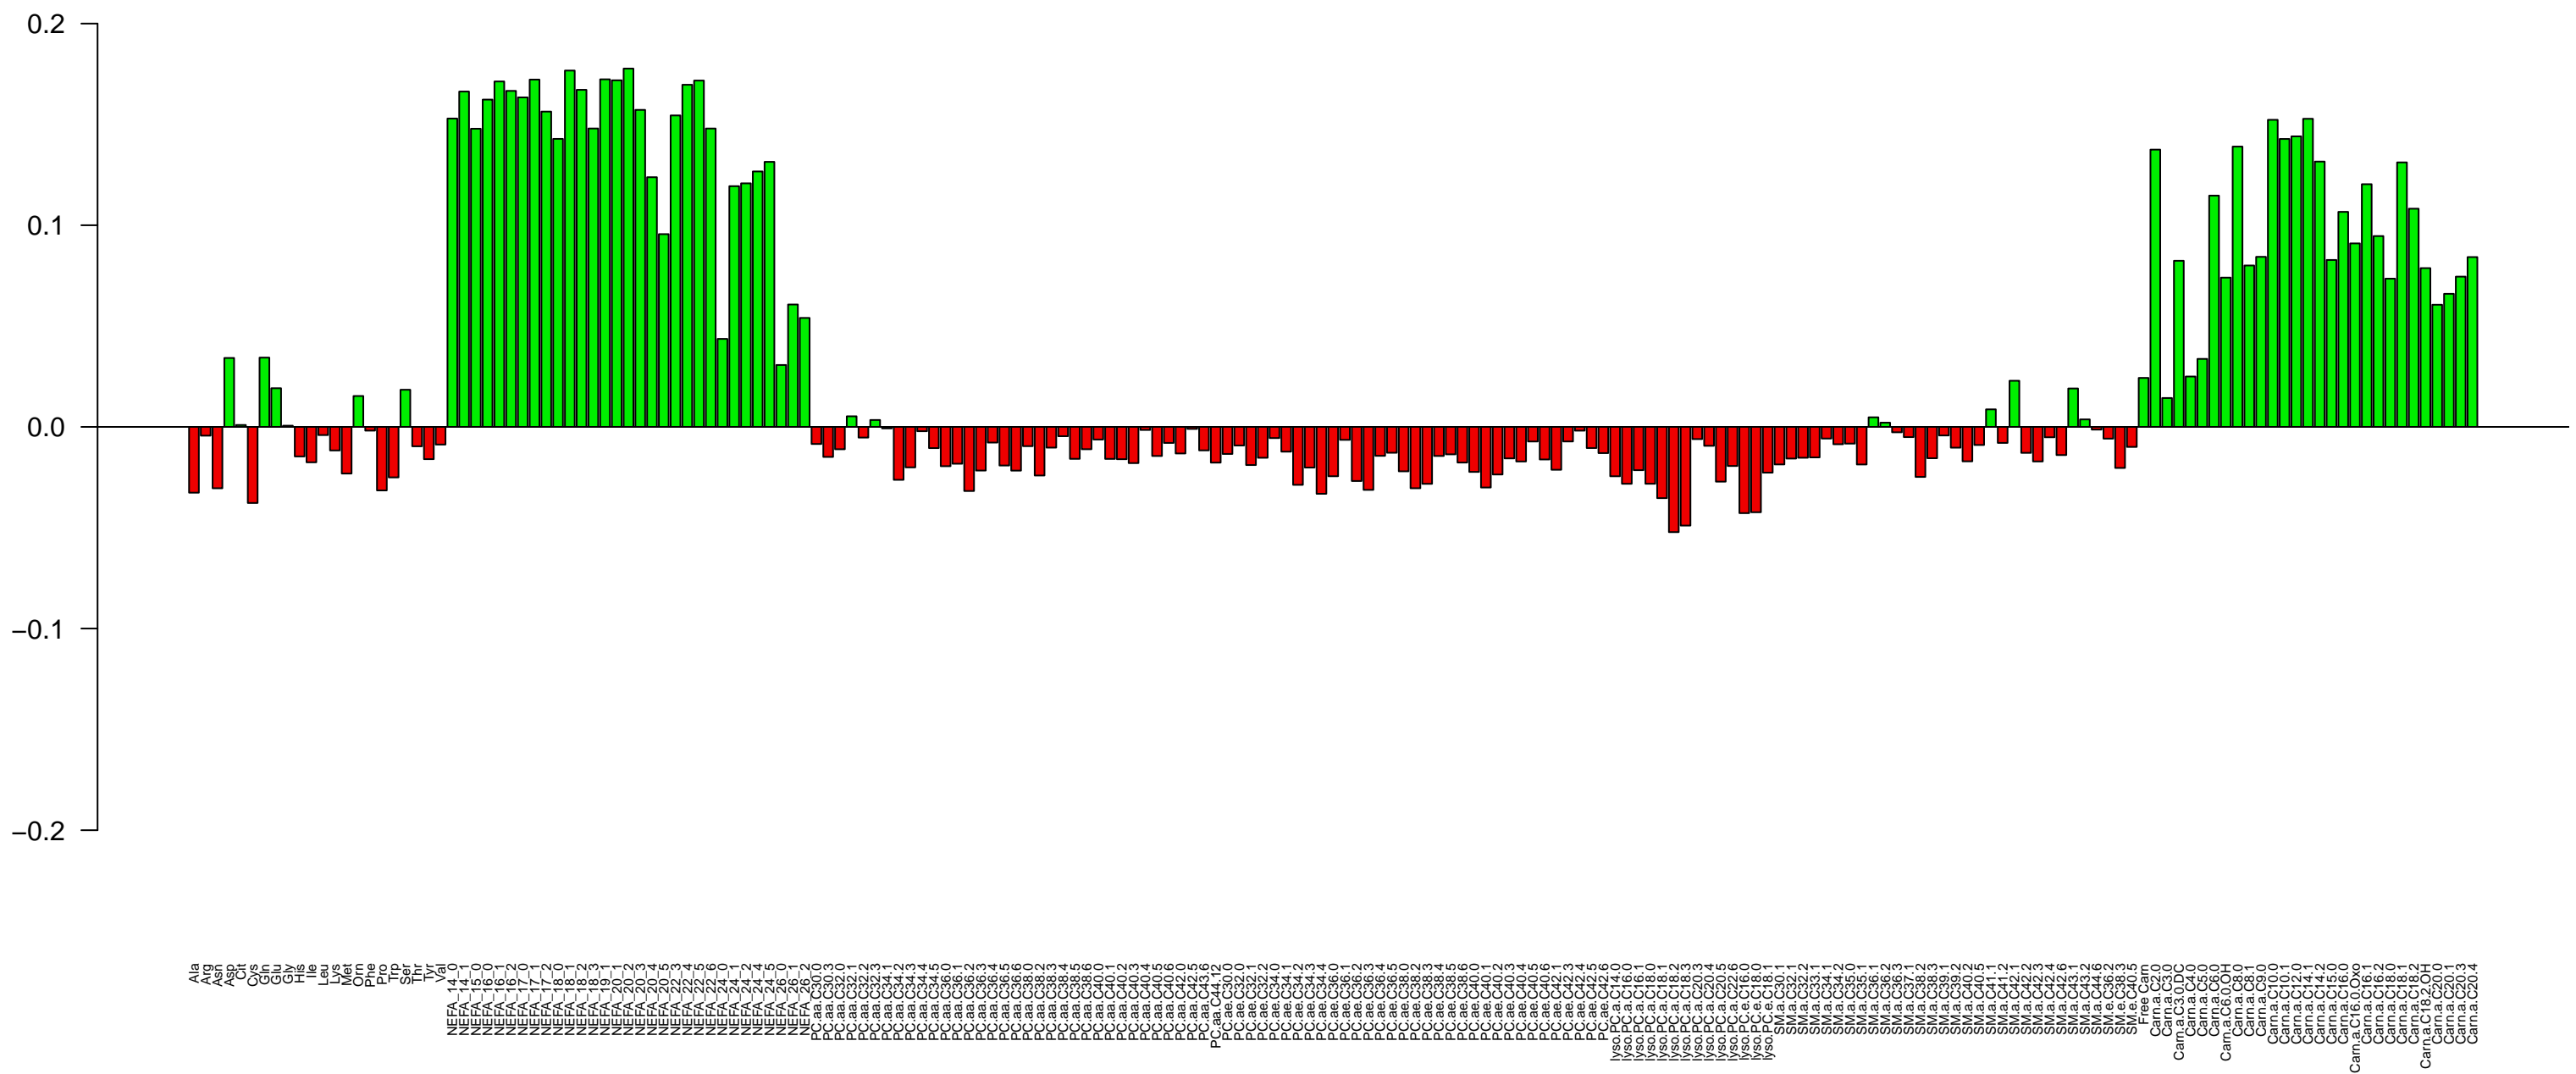

# Mother early pregnancy – PC 3 Loadings

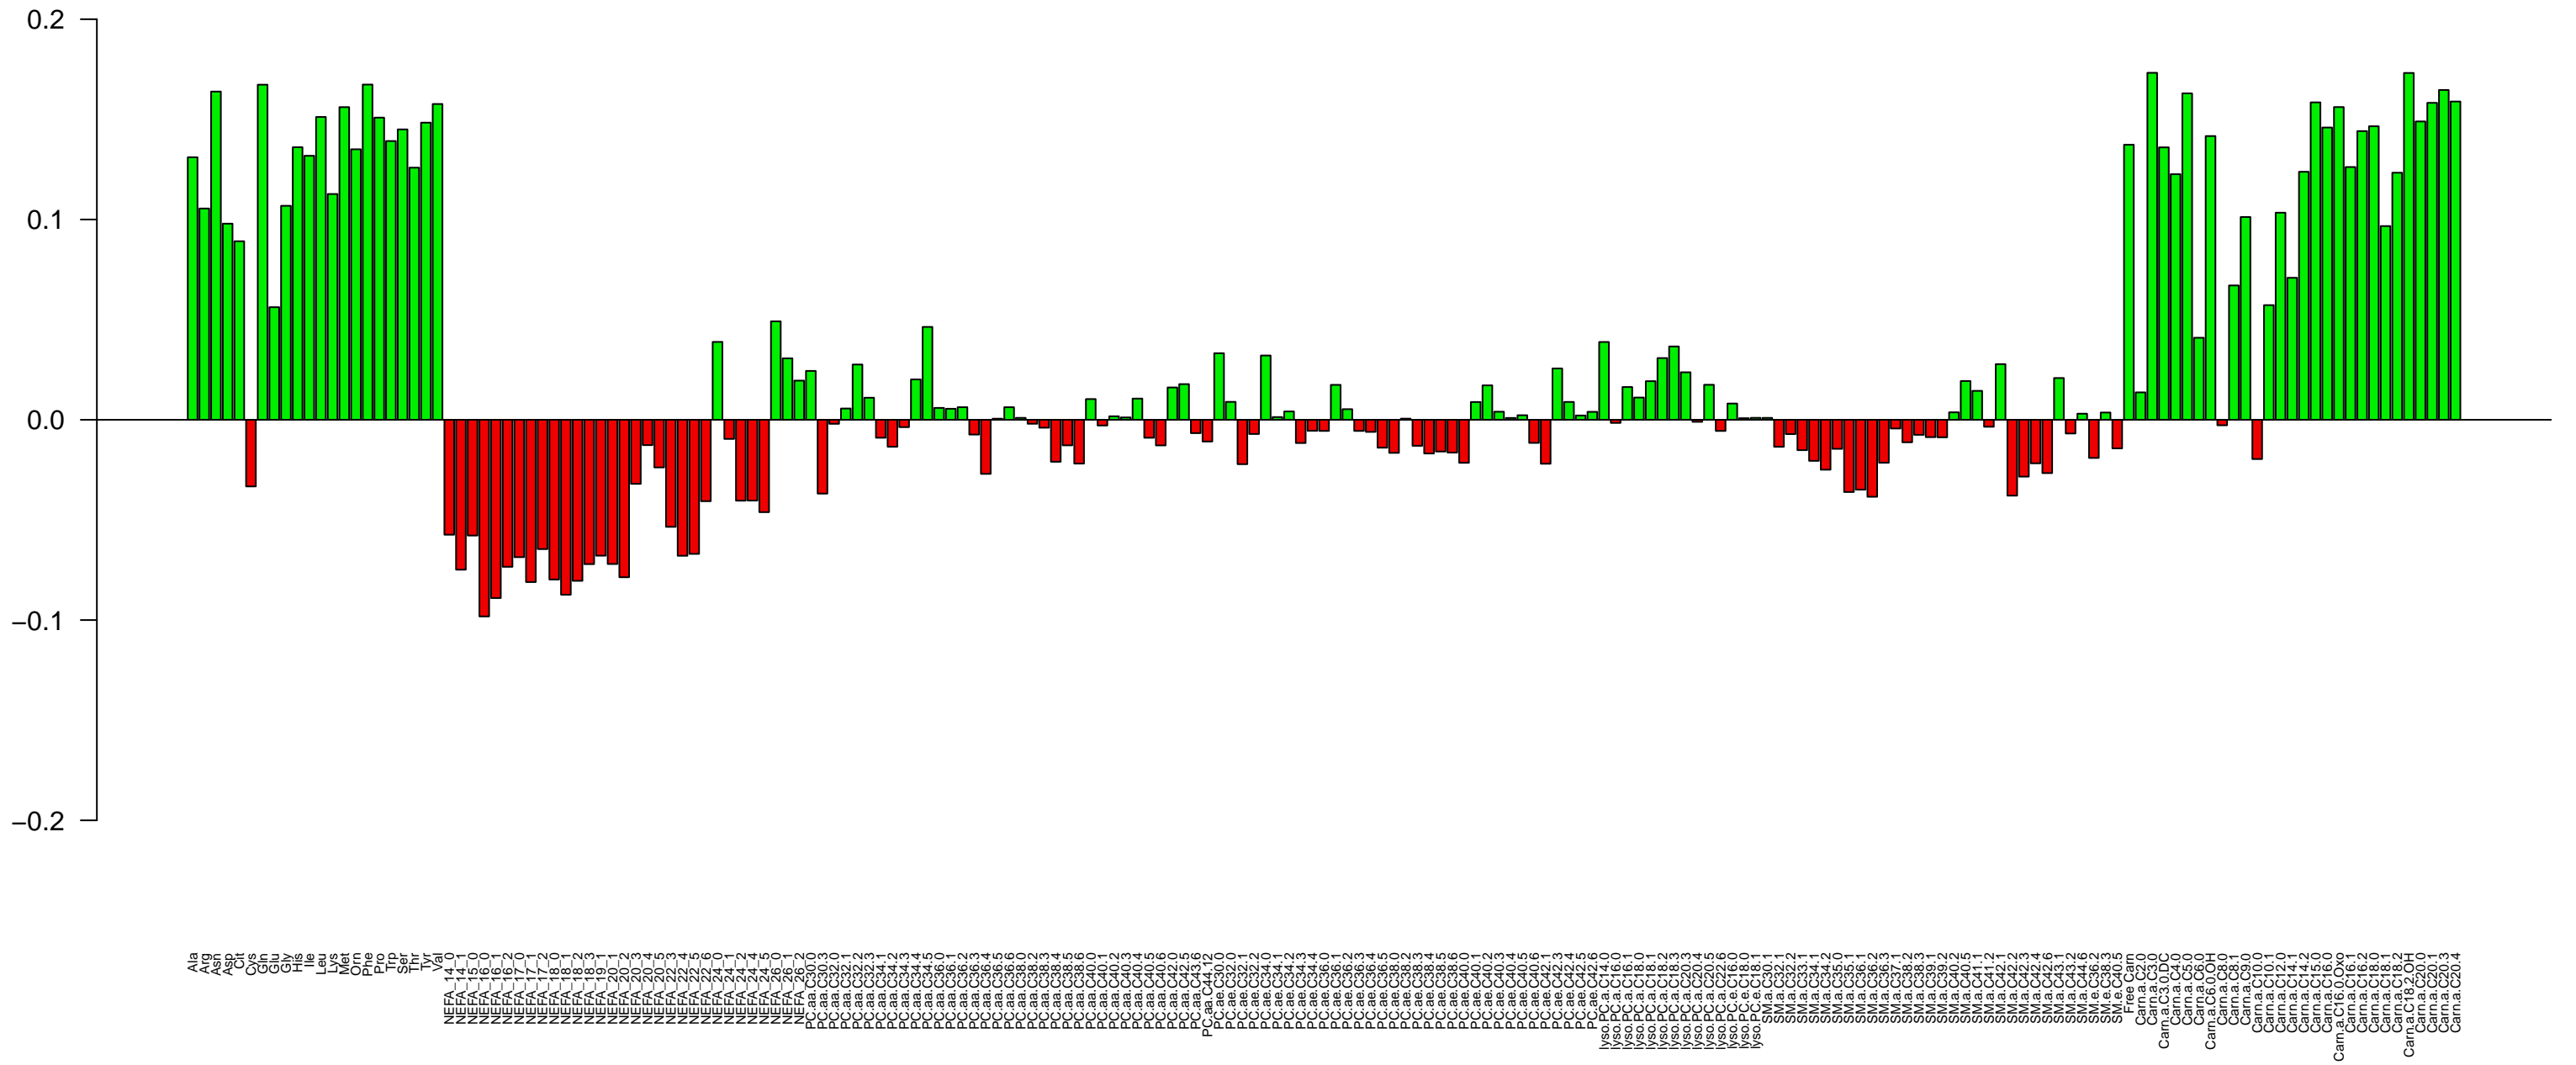

# Mother early pregnancy – PC 4 Loadings

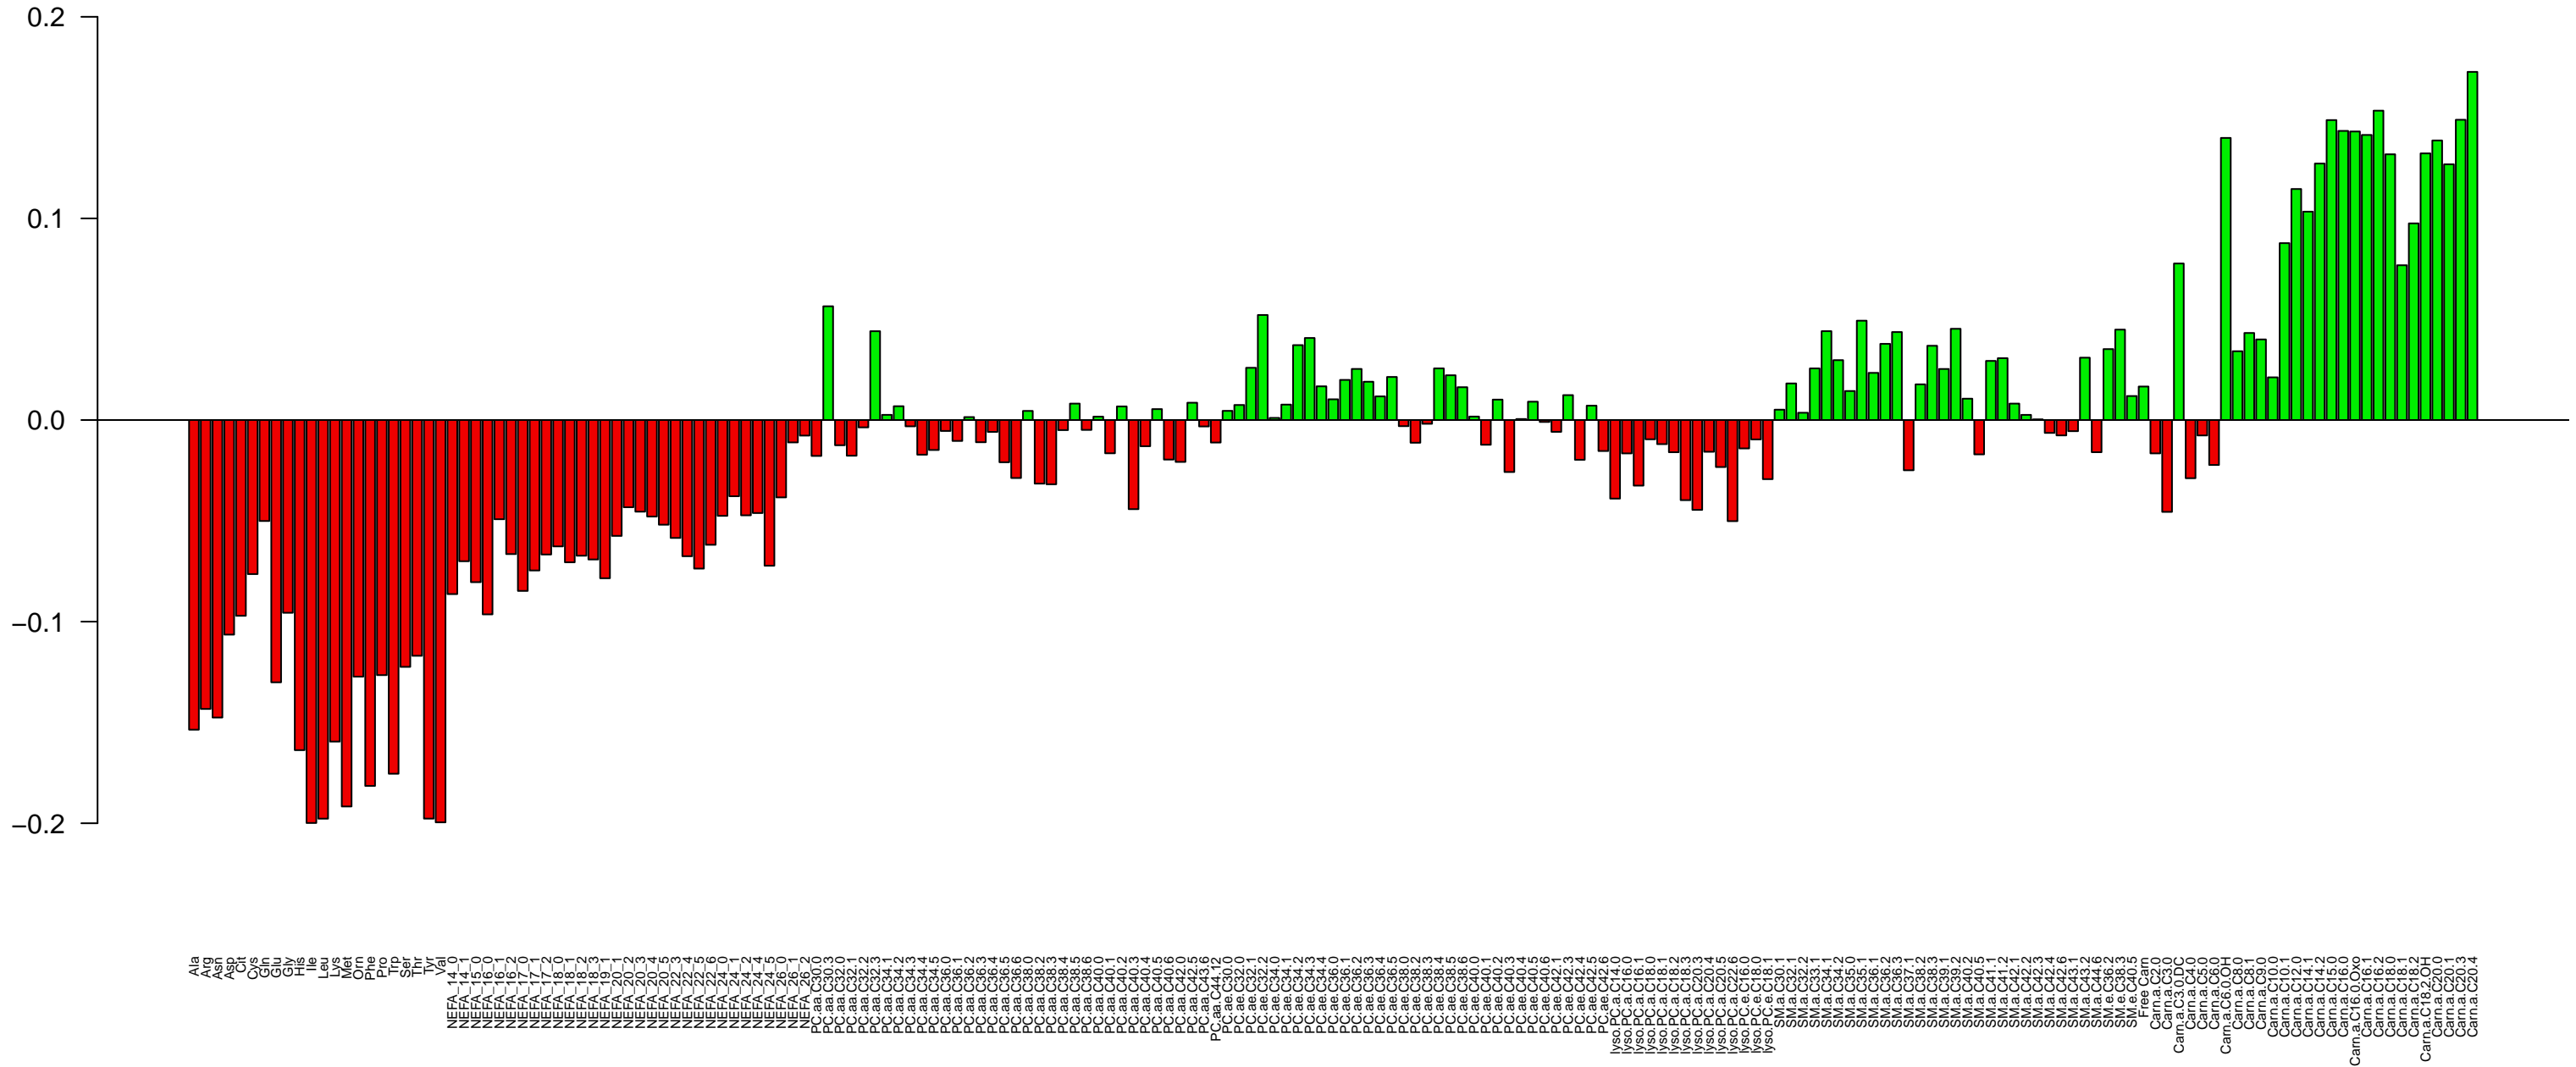

### Mother early pregnancy – PC 5 Loadings

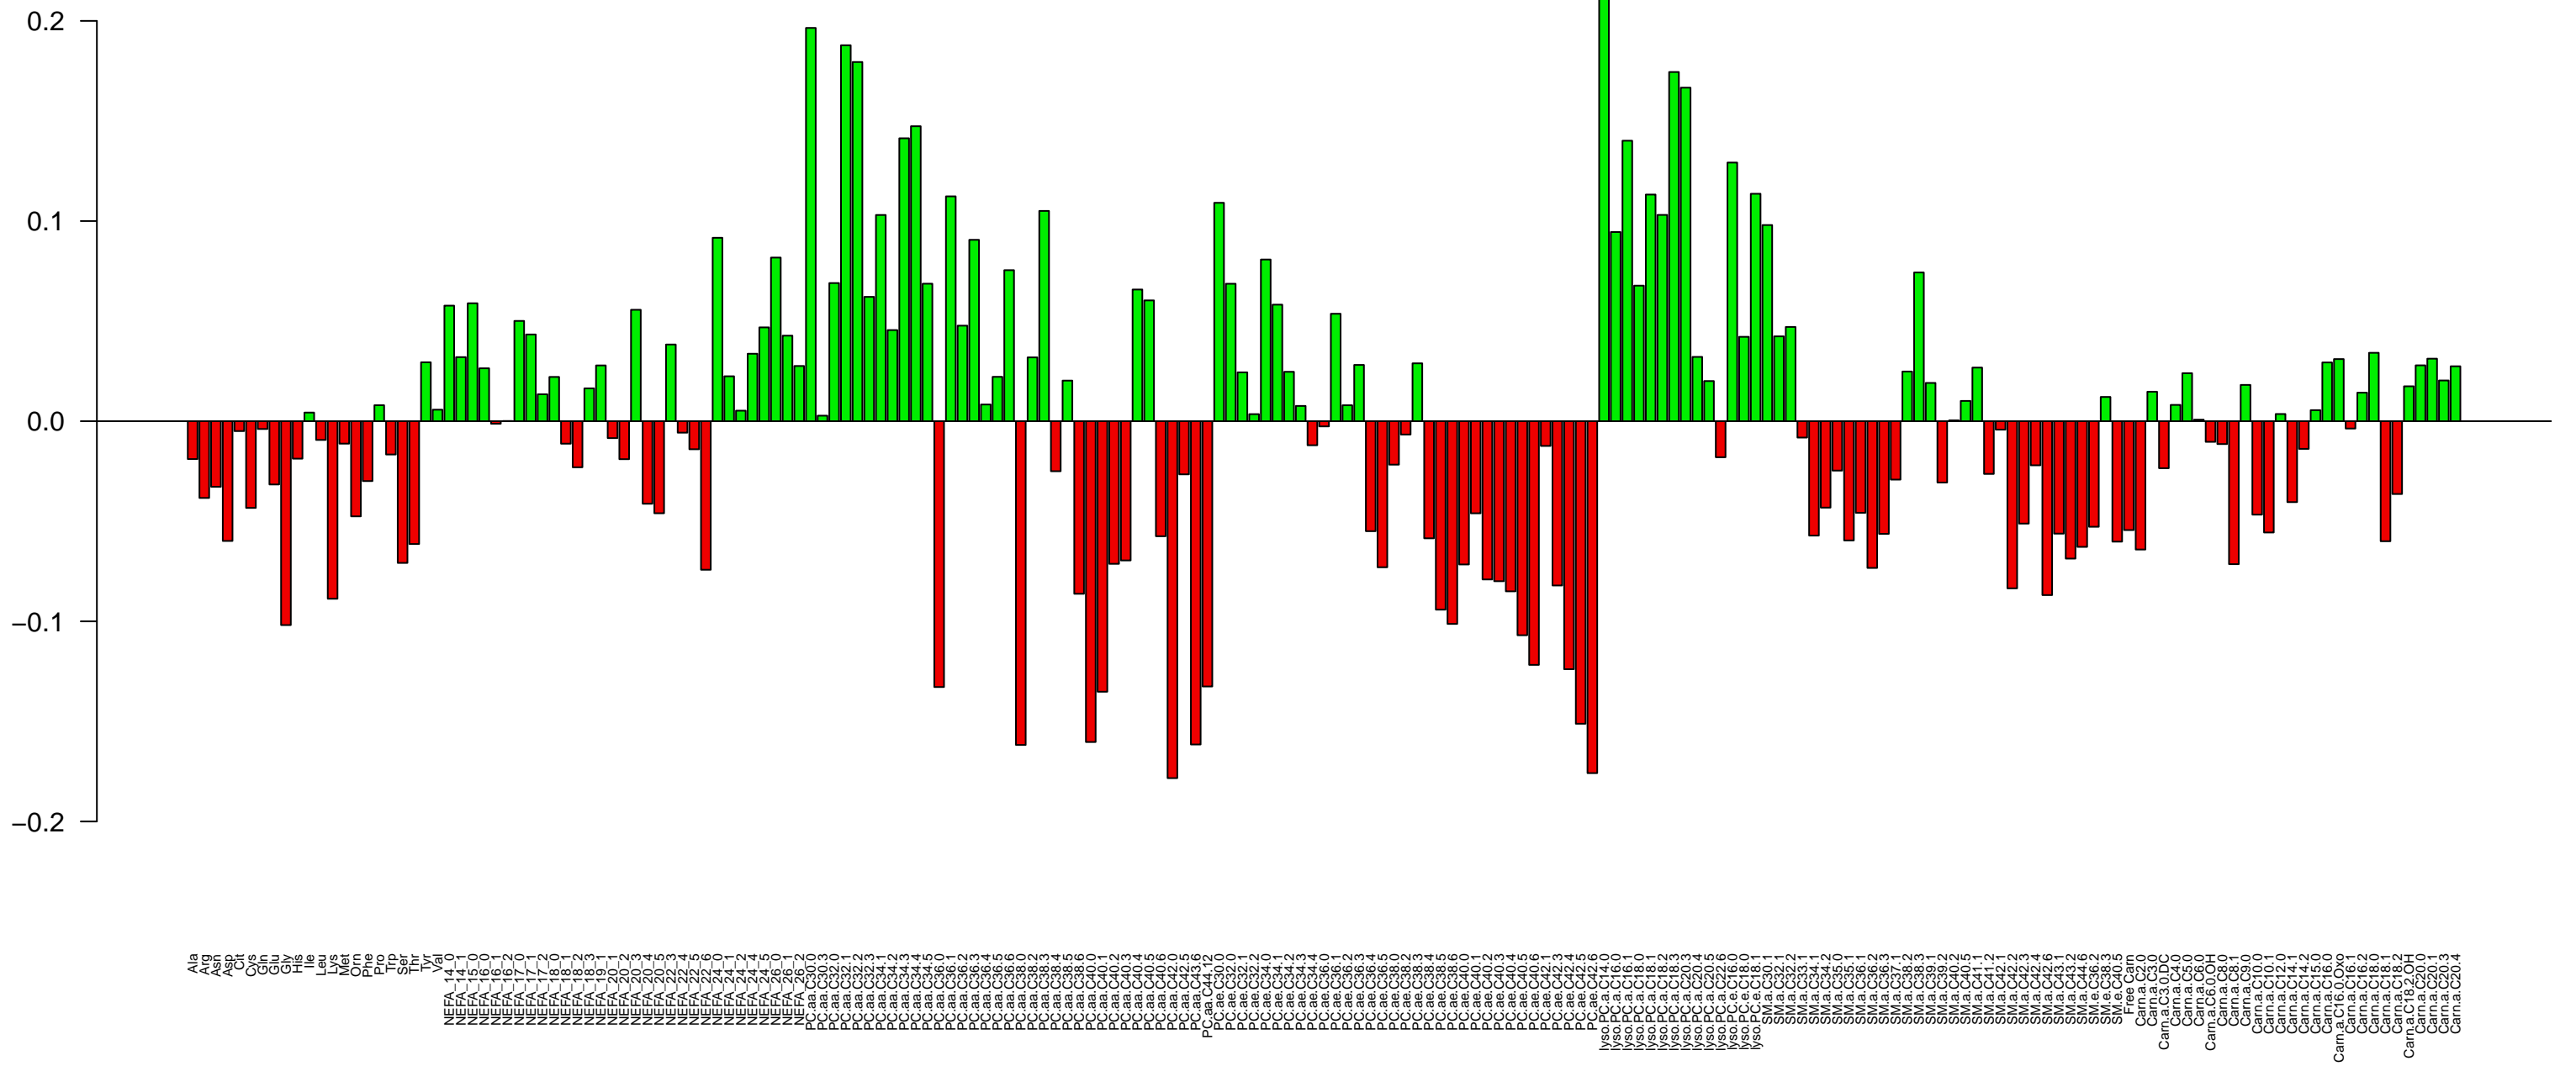



### Mother early pregnancy – PC 7 Loadings

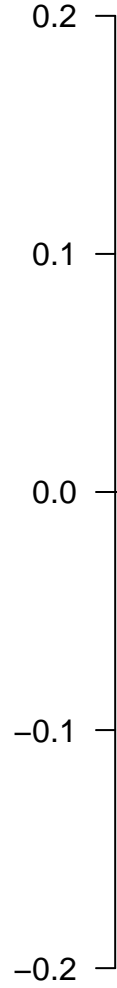

- Ala
- Arg
- Asn
- Asp
- Asx
- Cys
- Gln
- Glu
- His
- Ile
- Leu
- Lys
- Met
- Orn
- Phe
- Pip
- Pro
- Ser
- Thr
- Val
- NEFA\_14\_0
- NEFA\_14\_1
- NEFA\_16\_0
- NEFA\_16\_1
- NEFA\_18\_0
- NEFA\_18\_1
- NEFA\_19\_1
- NEFA\_20\_1
- NEFA\_20\_2
- NEFA\_20\_3
- NEFA\_20\_4
- NEFA\_22\_3
- NEFA\_22\_4
- NEFA\_22\_5
- NEFA\_22\_6
- NEFA\_24\_0
- NEFA\_24\_1
- NEFA\_24\_2
- NEFA\_24\_3
- NEFA\_24\_4
- NEFA\_26\_1
- NEFA\_26\_2
- PC\_aa\_C30\_0
- PC\_aa\_C30\_3
- PC\_aa\_C32\_1
- PC\_aa\_C32\_2
- PC\_aa\_C34\_1
- PC\_aa\_C34\_2
- PC\_aa\_C34\_3
- PC\_aa\_C34\_4
- PC\_aa\_C36\_0
- PC\_aa\_C36\_1
- PC\_aa\_C36\_2
- PC\_aa\_C36\_3
- PC\_aa\_C36\_4
- PC\_aa\_C38\_0
- PC\_aa\_C38\_2
- PC\_aa\_C38\_3
- PC\_aa\_C38\_4
- PC\_aa\_C38\_5
- PC\_aa\_C38\_6
- PC\_aa\_C40\_0
- PC\_aa\_C40\_2
- PC\_aa\_C40\_3
- PC\_aa\_C40\_4
- PC\_aa\_C40\_5
- PC\_aa\_C40\_6
- PC\_aa\_C42\_0
- PC\_aa\_C42\_1
- PC\_aa\_C42\_2
- PC\_aa\_C42\_3
- PC\_aa\_C42\_4
- PC\_aa\_C42\_5
- PC\_aa\_C42\_6
- PC\_ee\_C30\_0
- PC\_ee\_C32\_0
- PC\_ee\_C32\_1
- PC\_ee\_C32\_2
- PC\_ee\_C34\_0
- PC\_ee\_C34\_1
- PC\_ee\_C34\_2
- PC\_ee\_C34\_3
- PC\_ee\_C34\_4
- PC\_ee\_C36\_0
- PC\_ee\_C36\_1
- PC\_ee\_C36\_2
- PC\_ee\_C36\_3
- PC\_ee\_C36\_4
- PC\_ee\_C36\_5
- PC\_ee\_C38\_0
- PC\_ee\_C38\_2
- PC\_ee\_C38\_3
- PC\_ee\_C38\_4
- PC\_ee\_C38\_5
- PC\_ee\_C38\_6
- PC\_ee\_C40\_0
- PC\_ee\_C40\_2
- PC\_ee\_C40\_3
- PC\_ee\_C40\_4
- PC\_ee\_C40\_5
- PC\_ee\_C40\_6
- PC\_ee\_C42\_0
- PC\_ee\_C42\_1
- PC\_ee\_C42\_2
- PC\_ee\_C42\_3
- PC\_ee\_C42\_4
- PC\_ee\_C42\_5
- PC\_ee\_C42\_6
- Iyso\_PC\_a\_C14\_0
- Iyso\_PC\_a\_C16\_0
- Iyso\_PC\_a\_C18\_0
- Iyso\_PC\_a\_C18\_1
- Iyso\_PC\_a\_C18\_2
- Iyso\_PC\_a\_C18\_3
- Iyso\_PC\_a\_C20\_3
- Iyso\_PC\_a\_C20\_4
- Iyso\_PC\_a\_C22\_0
- Iyso\_PC\_a\_C22\_1
- Iyso\_PC\_e\_C18\_0
- Iyso\_PC\_e\_C18\_1
- SM\_a\_C30\_1
- SM\_a\_C32\_1
- SM\_a\_C32\_2
- SM\_a\_C34\_1
- SM\_a\_C34\_2
- SM\_a\_C35\_0
- SM\_a\_C35\_1
- SM\_a\_C36\_1
- SM\_a\_C36\_2
- SM\_a\_C37\_1
- SM\_a\_C38\_1
- SM\_a\_C38\_2
- SM\_a\_C39\_1
- SM\_a\_C39\_2
- SM\_a\_C40\_1
- SM\_a\_C40\_2
- SM\_a\_C41\_1
- SM\_a\_C41\_2
- SM\_a\_C42\_1
- SM\_a\_C42\_2
- SM\_a\_C42\_3
- SM\_a\_C42\_4
- SM\_a\_C42\_5
- SM\_a\_C42\_6
- SM\_e\_C42\_1
- SM\_e\_C42\_2
- SM\_e\_C42\_3
- SM\_e\_C42\_4
- SM\_e\_C42\_5
- SM\_e\_C42\_6
- SM\_e\_C38\_3
- SM\_e\_C40\_5
- Free Carn
- Carn.a.C2\_0
- Carn.a.C3\_0
- Carn.a.C4\_0
- Carn.a.C5\_0
- Carn.a.C6\_0
- Carn.a.C6\_0.OH
- Carn.a.C8\_0
- Carn.a.C8\_1
- Carn.a.C8\_2
- Carn.a.C10\_0
- Carn.a.C10\_1
- Carn.a.C12\_0
- Carn.a.C14\_1
- Carn.a.C14\_2
- Carn.a.C16\_0
- Carn.a.C16\_0.Ox
- Carn.a.C16\_1
- Carn.a.C16\_2
- Carn.a.C18\_0
- Carn.a.C18\_1
- Carn.a.C18\_2
- Carn.a.C20\_0
- Carn.a.C20\_1
- Carn.a.C20\_2
- Carn.a.C20\_3
- Carn.a.C20\_4

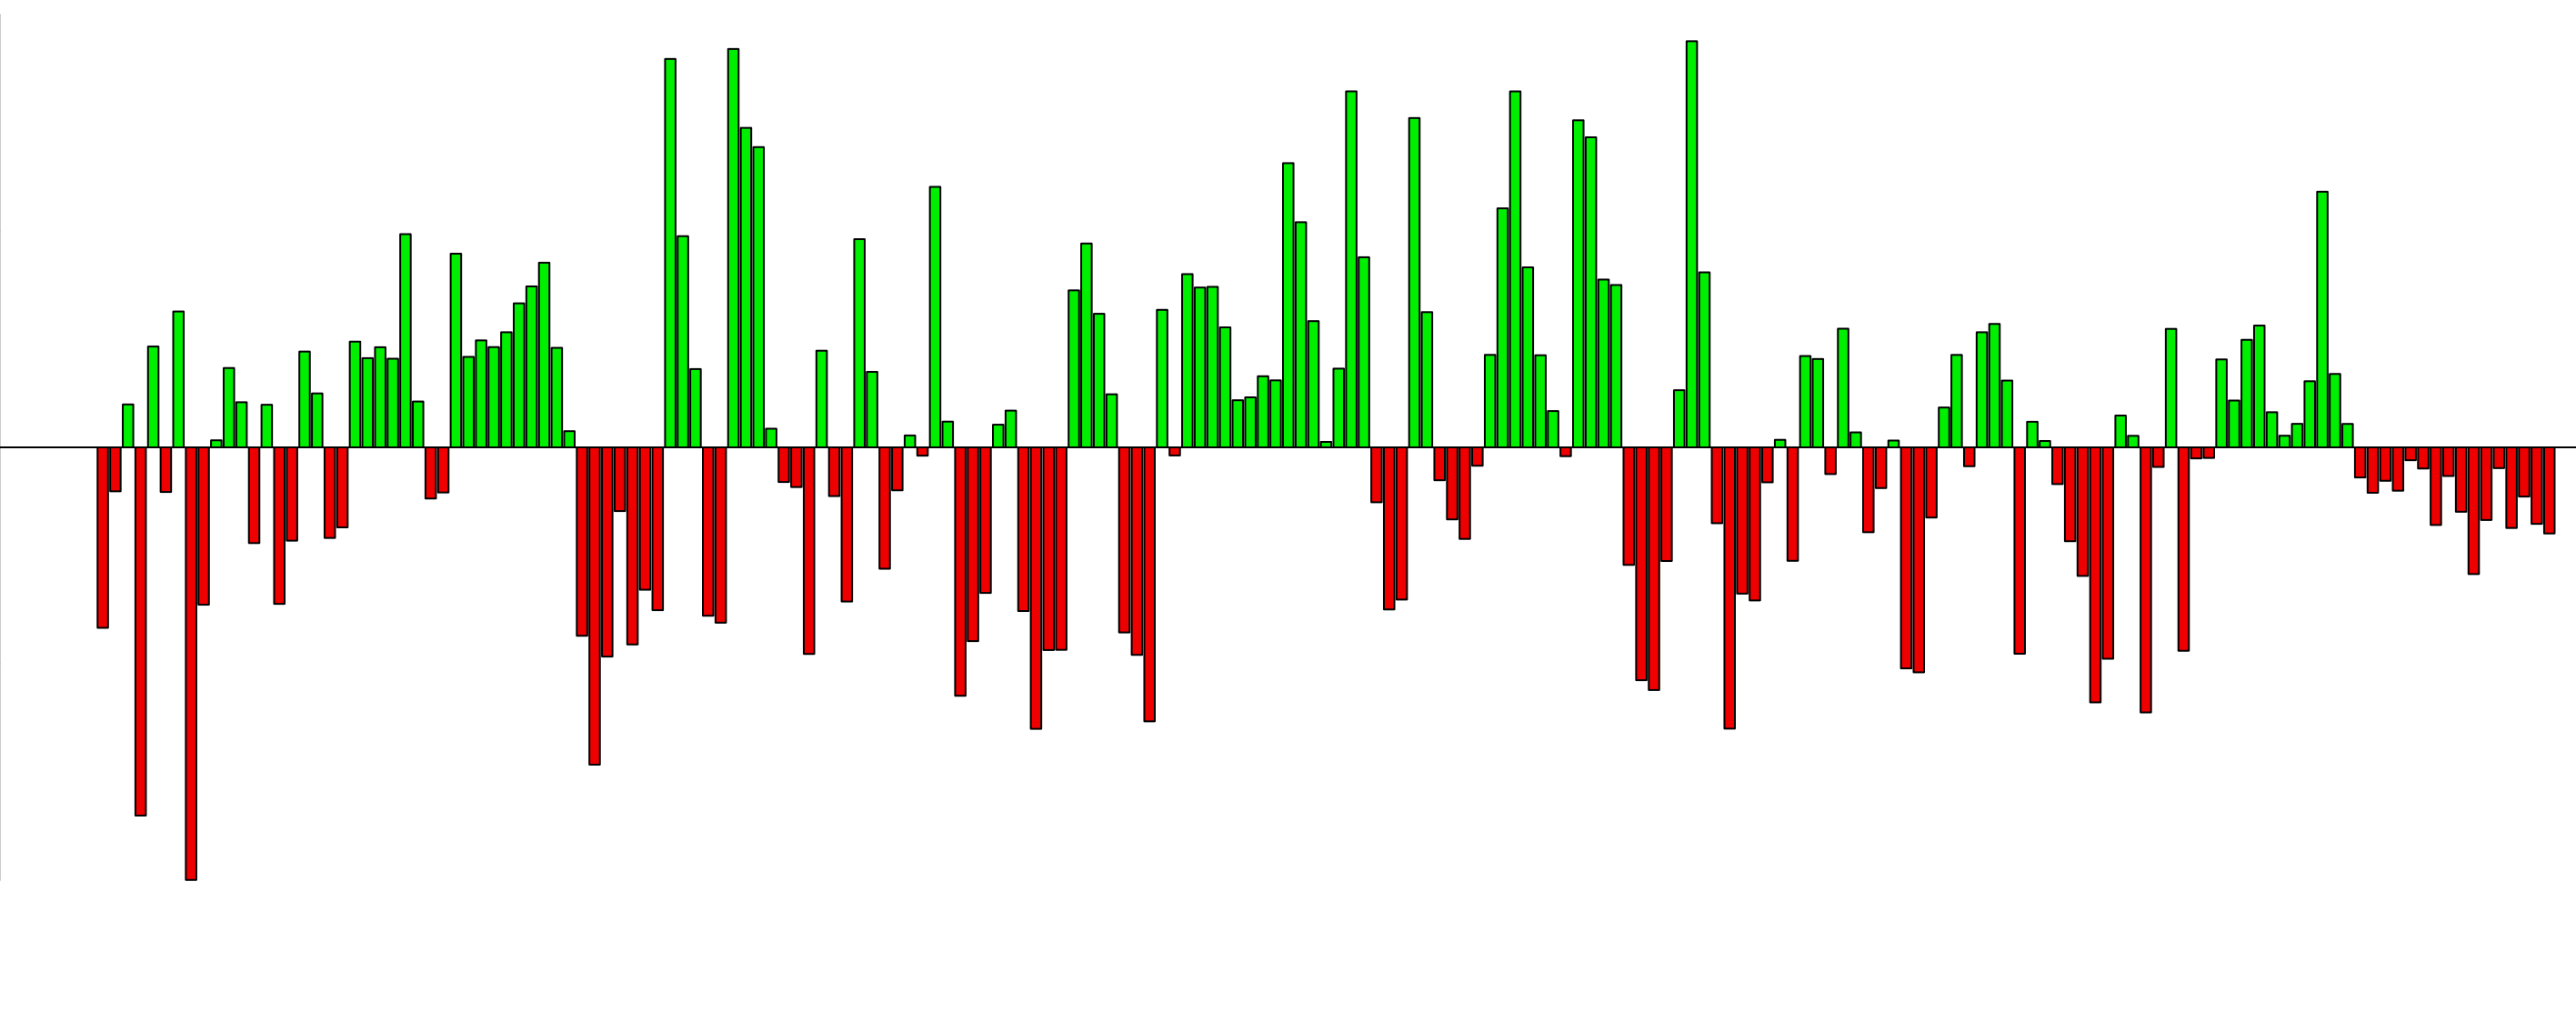

Mother early pregnancy – PC 8 Loadings

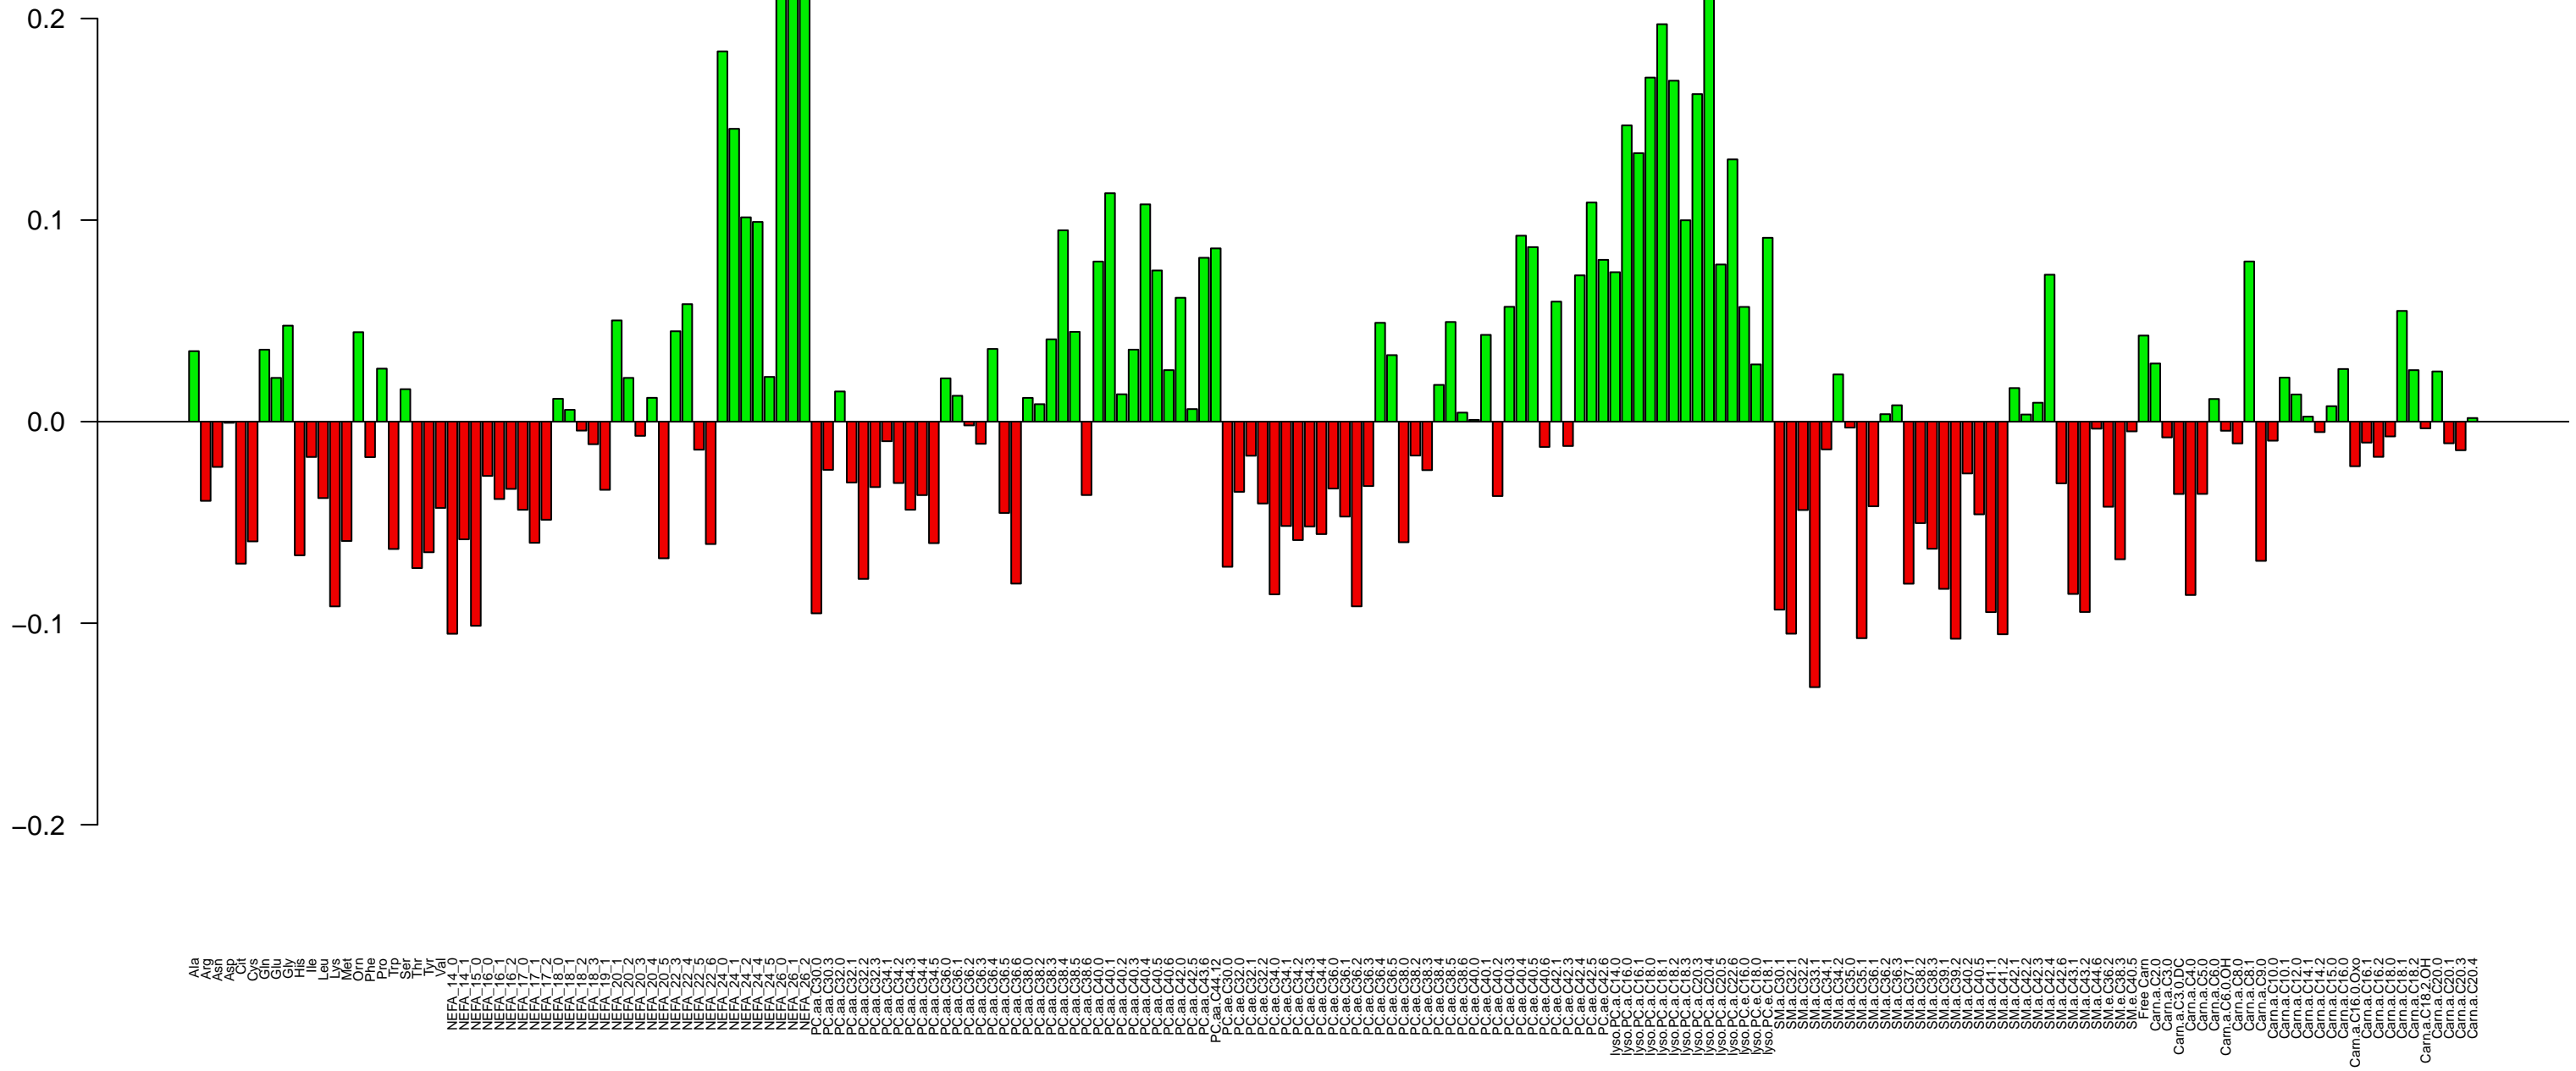



# Mother early pregnancy – PC 9 Loadings

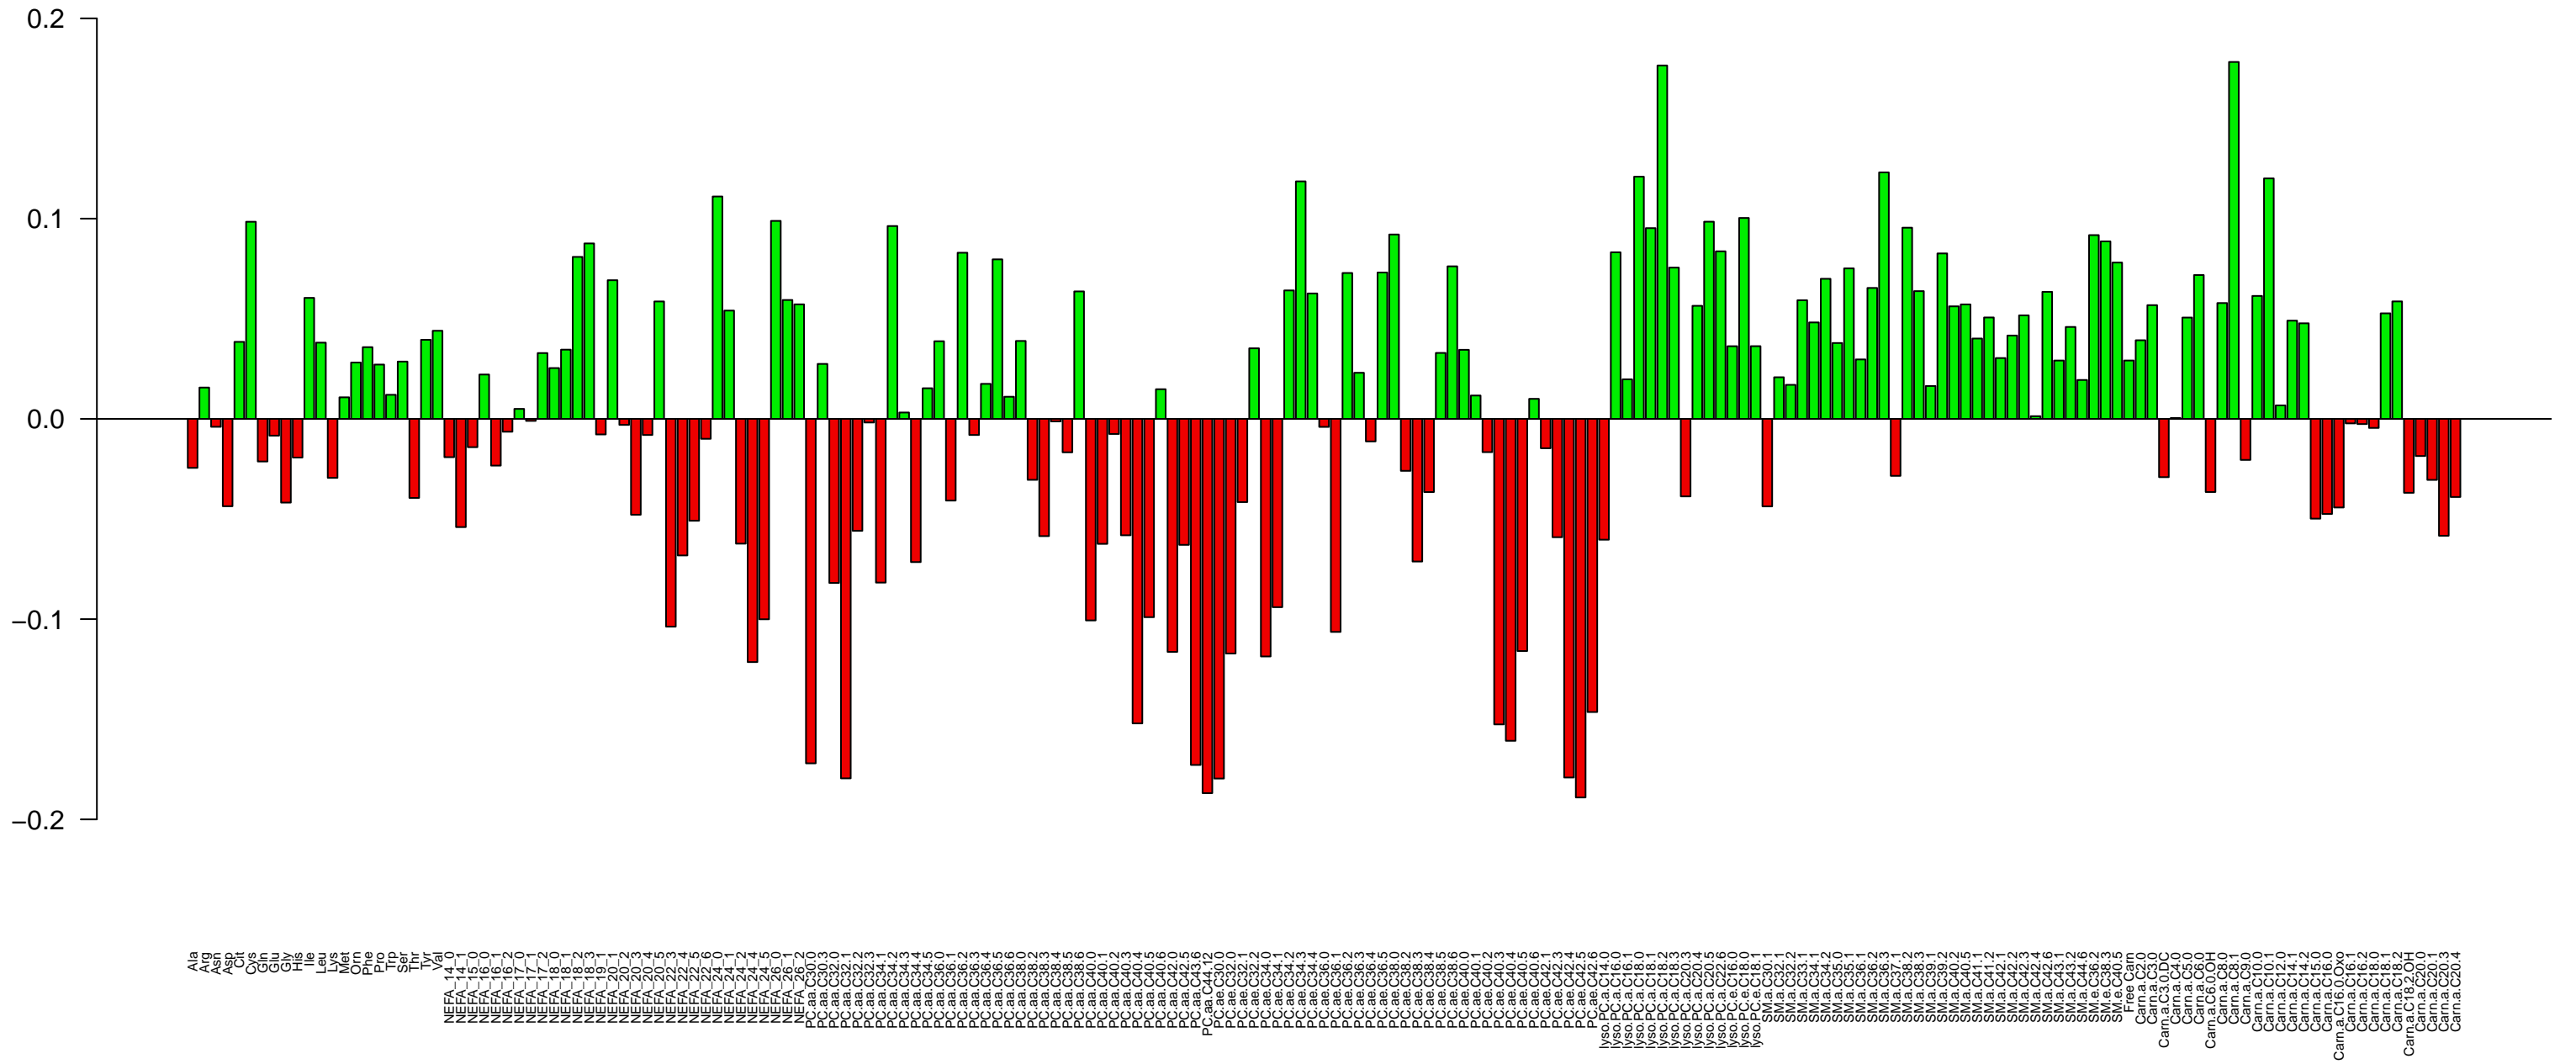

# Mother early pregnancy – PC 10 Loadings

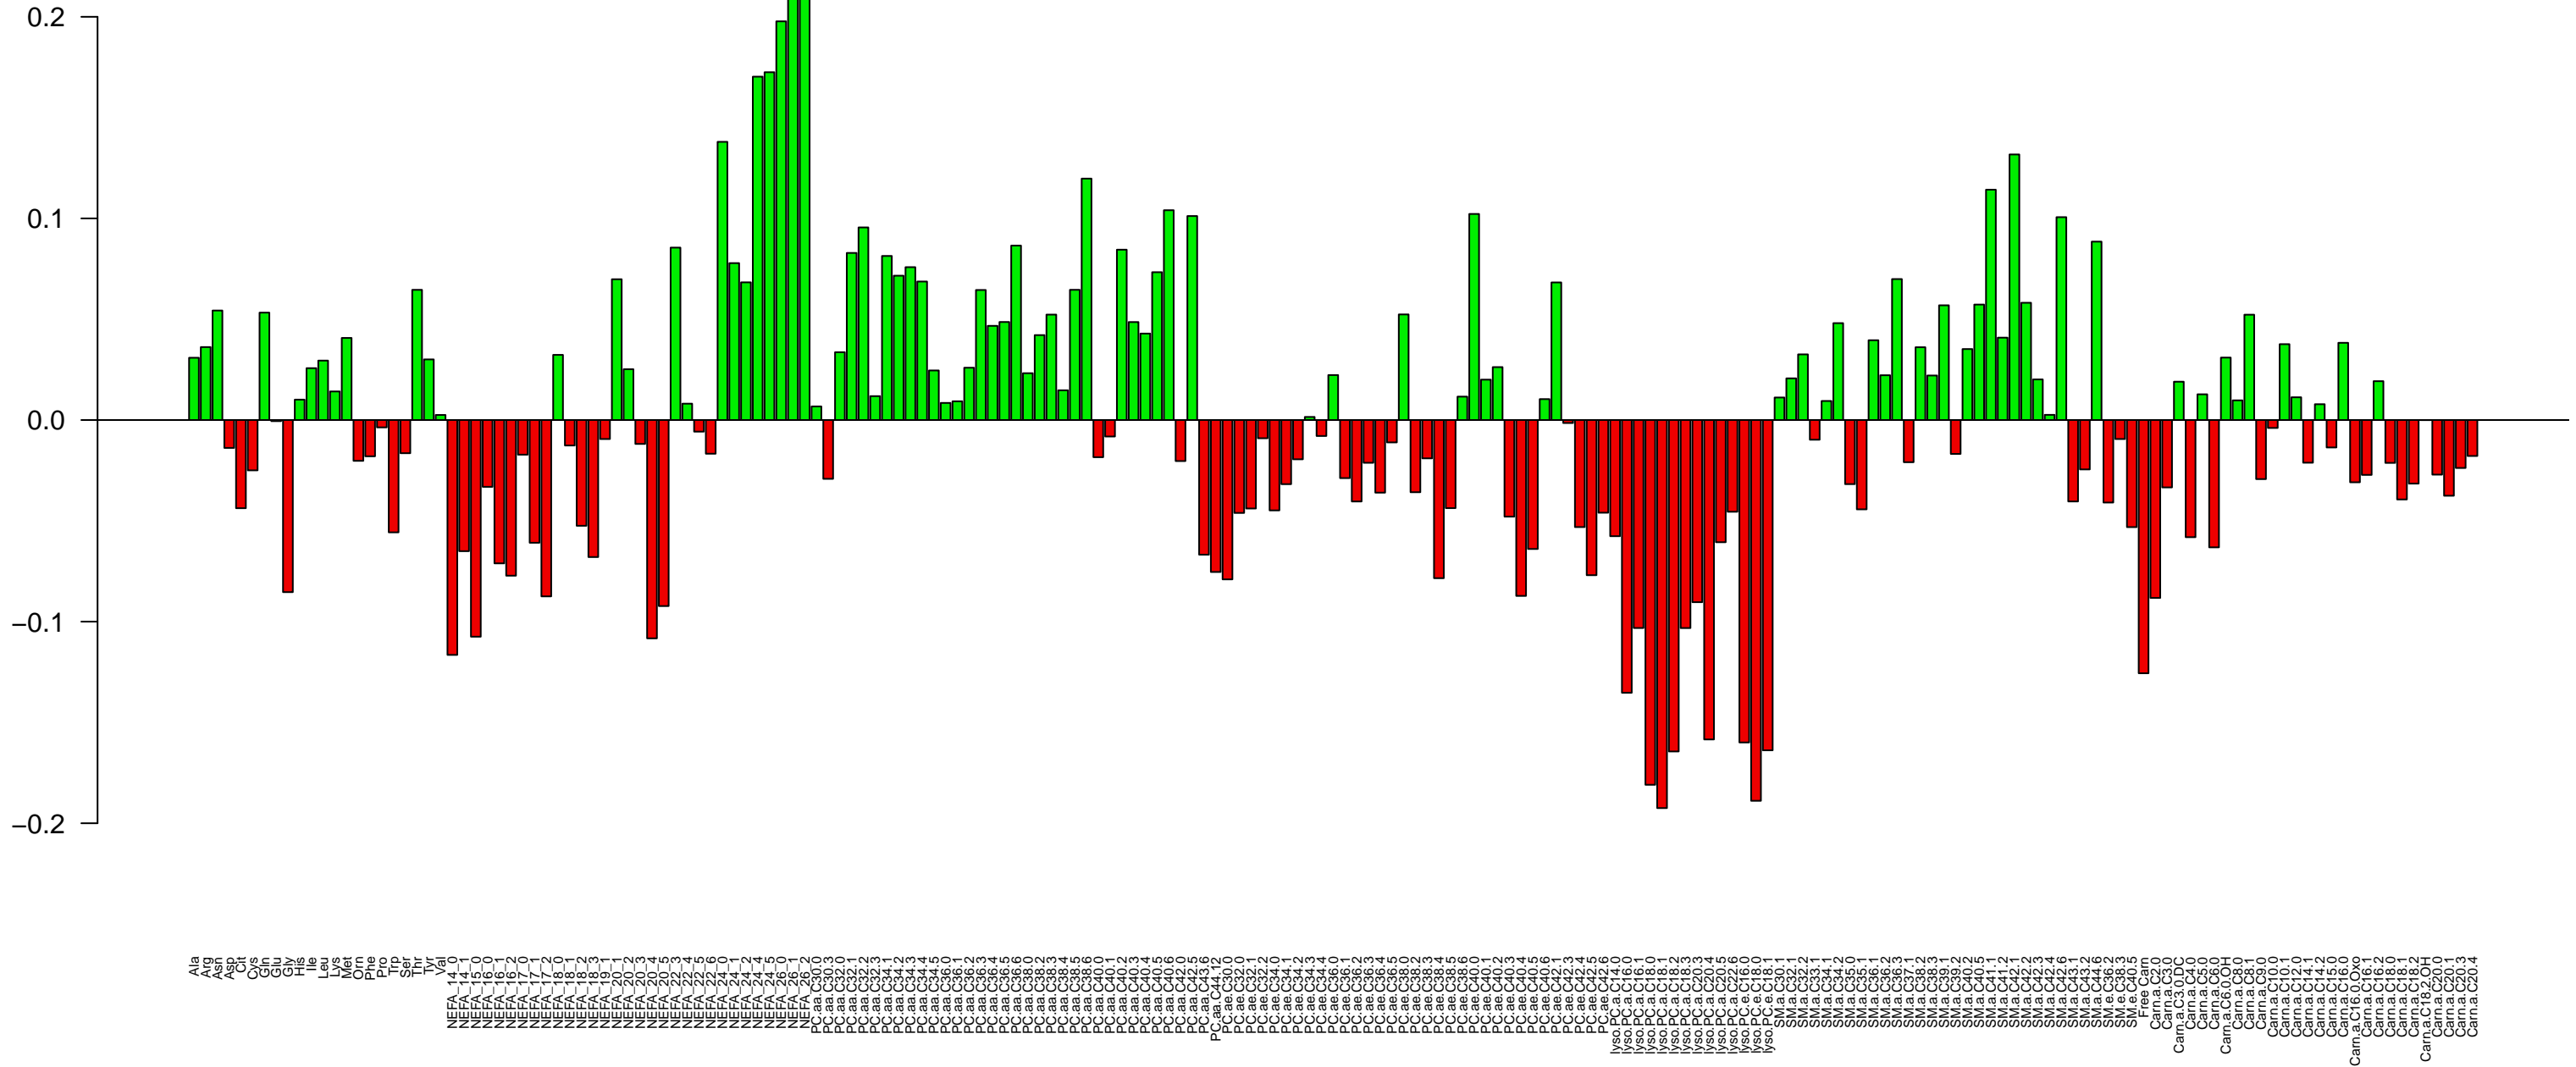

# Mother early pregnancy – PC 11 Loadings

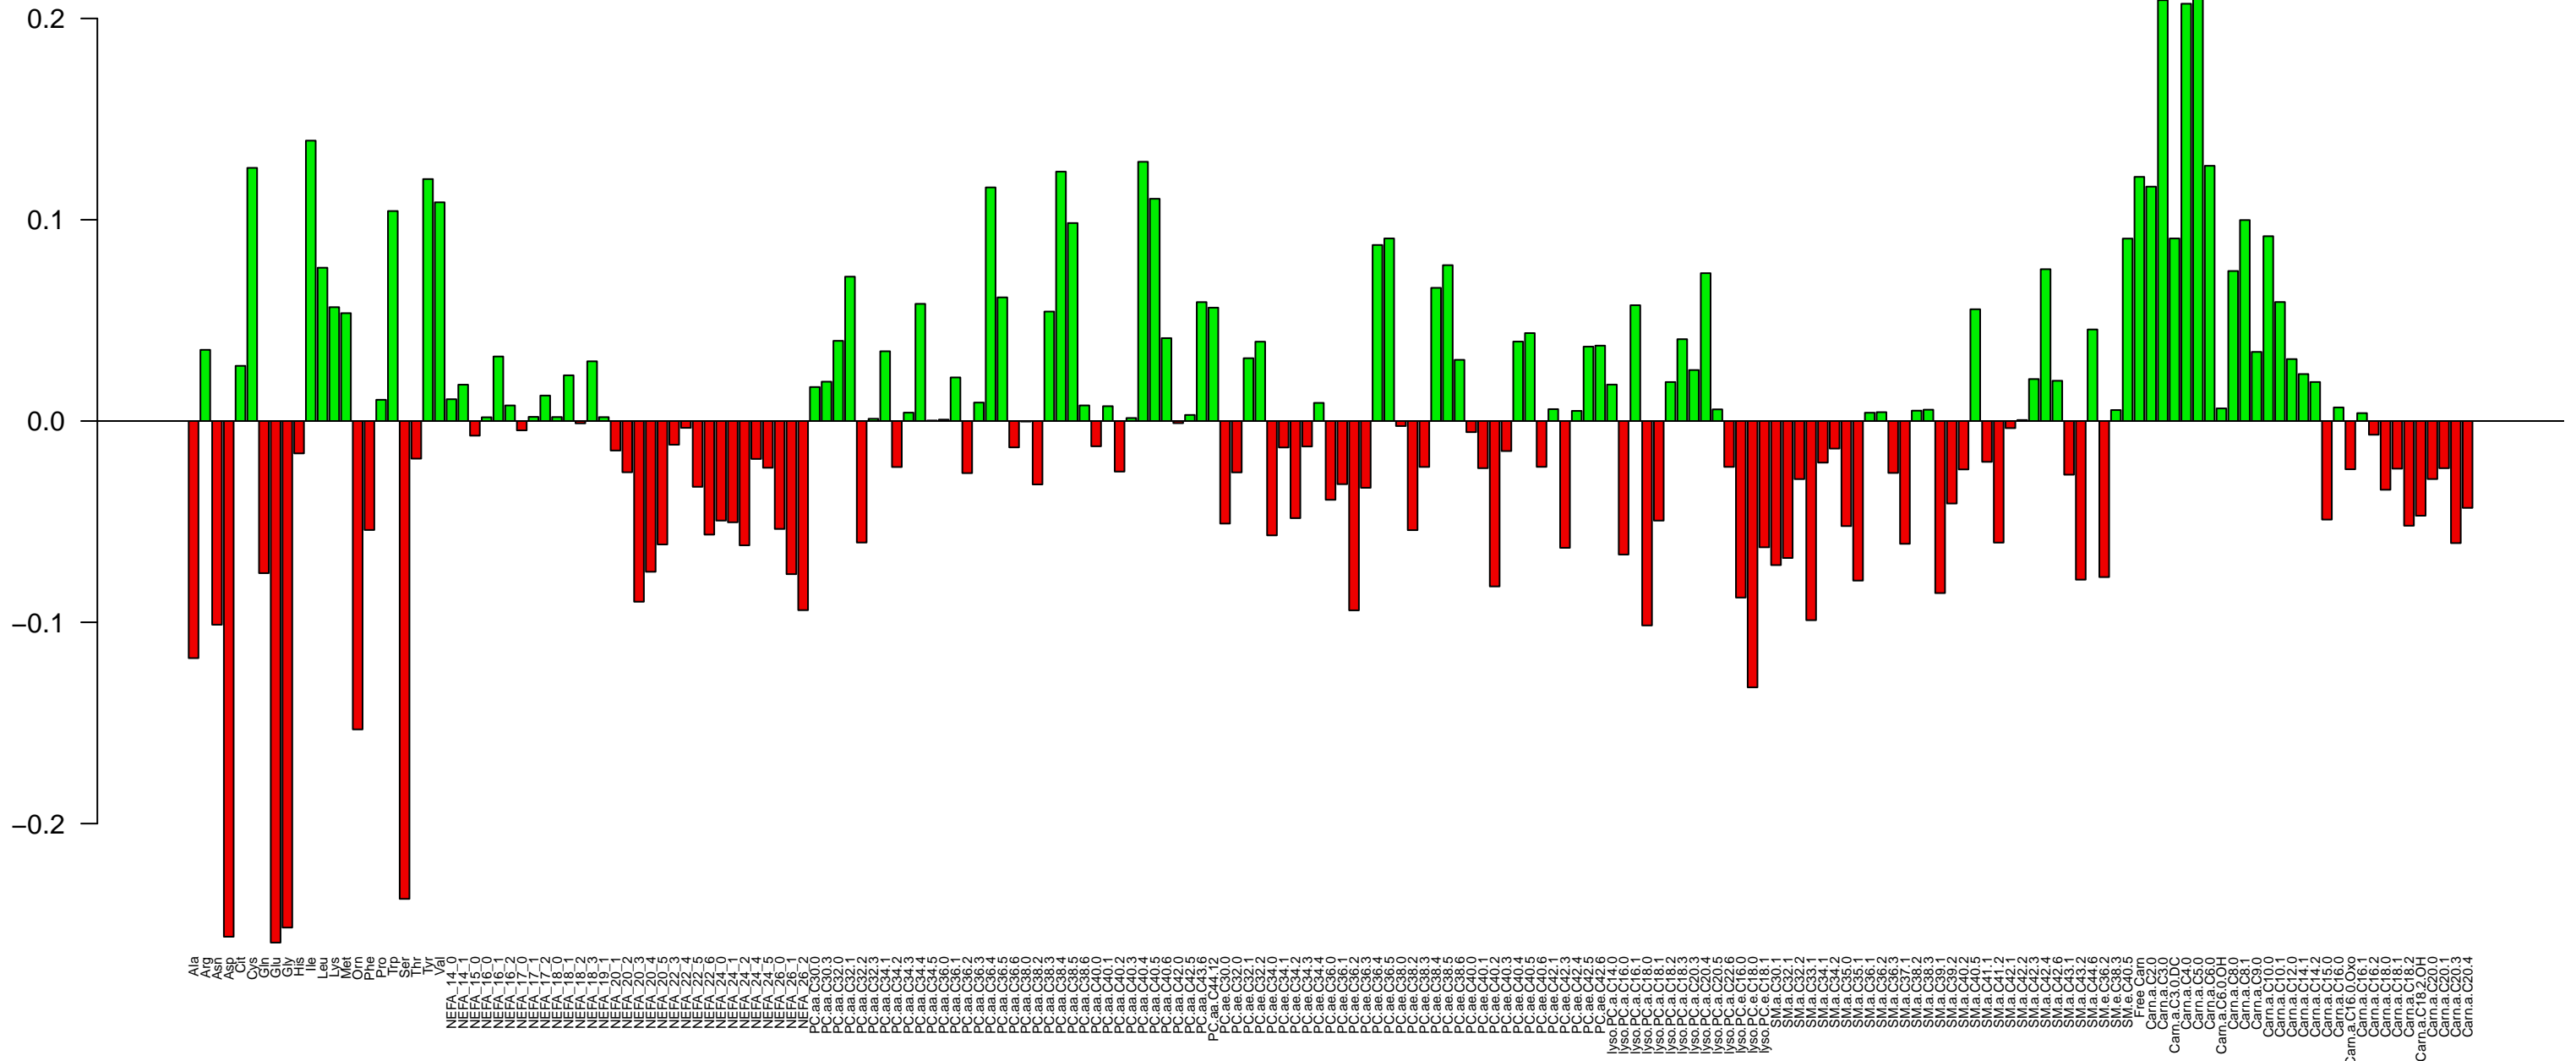

### Mother early pregnancy – PC 12 Loadings

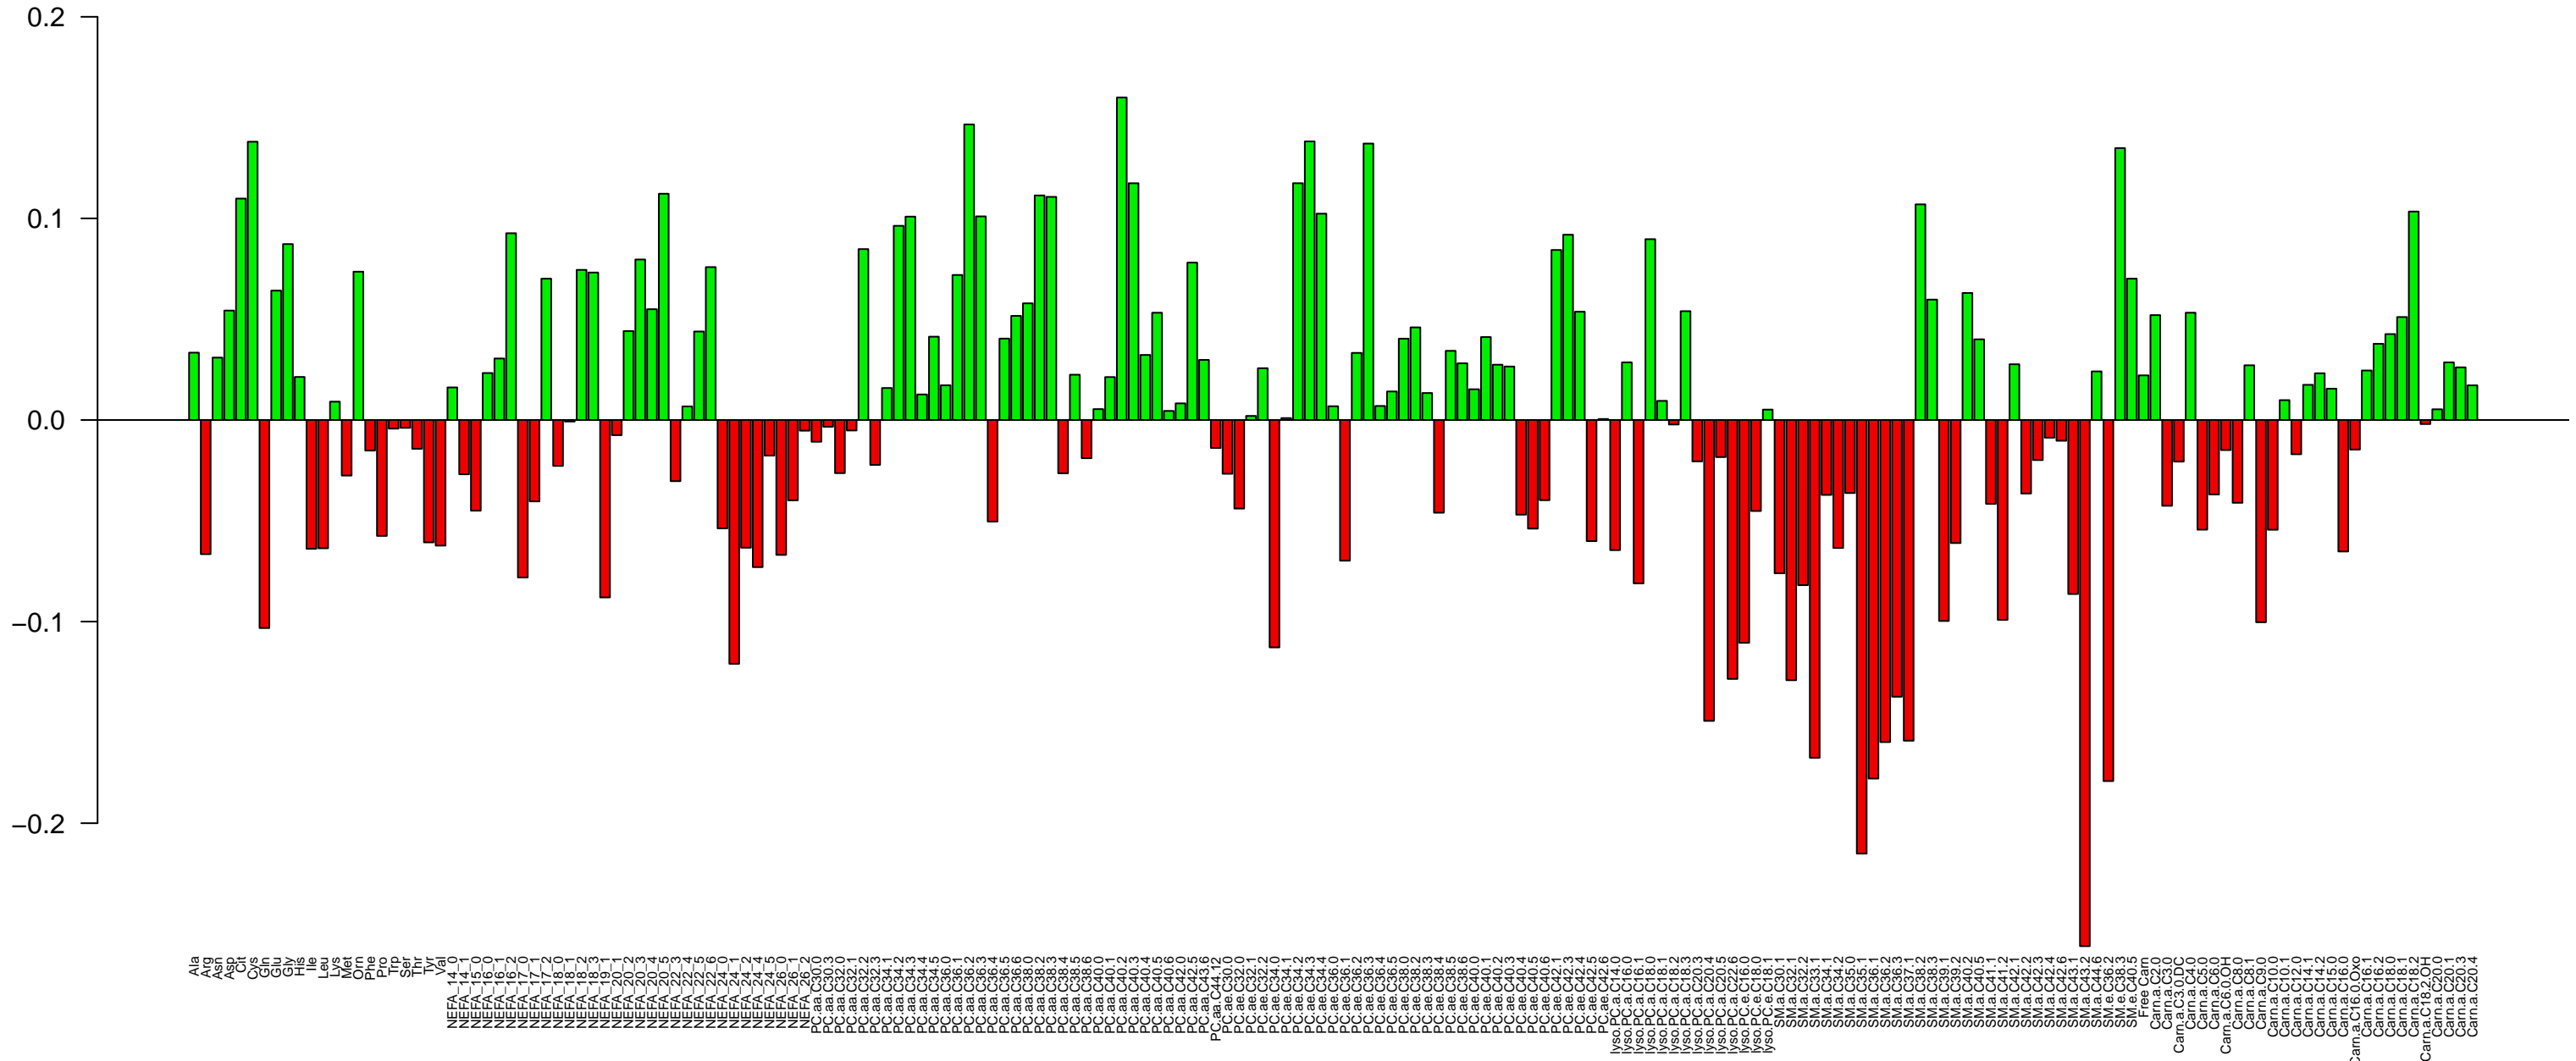

# Mother early pregnancy – PC 13 Loadings

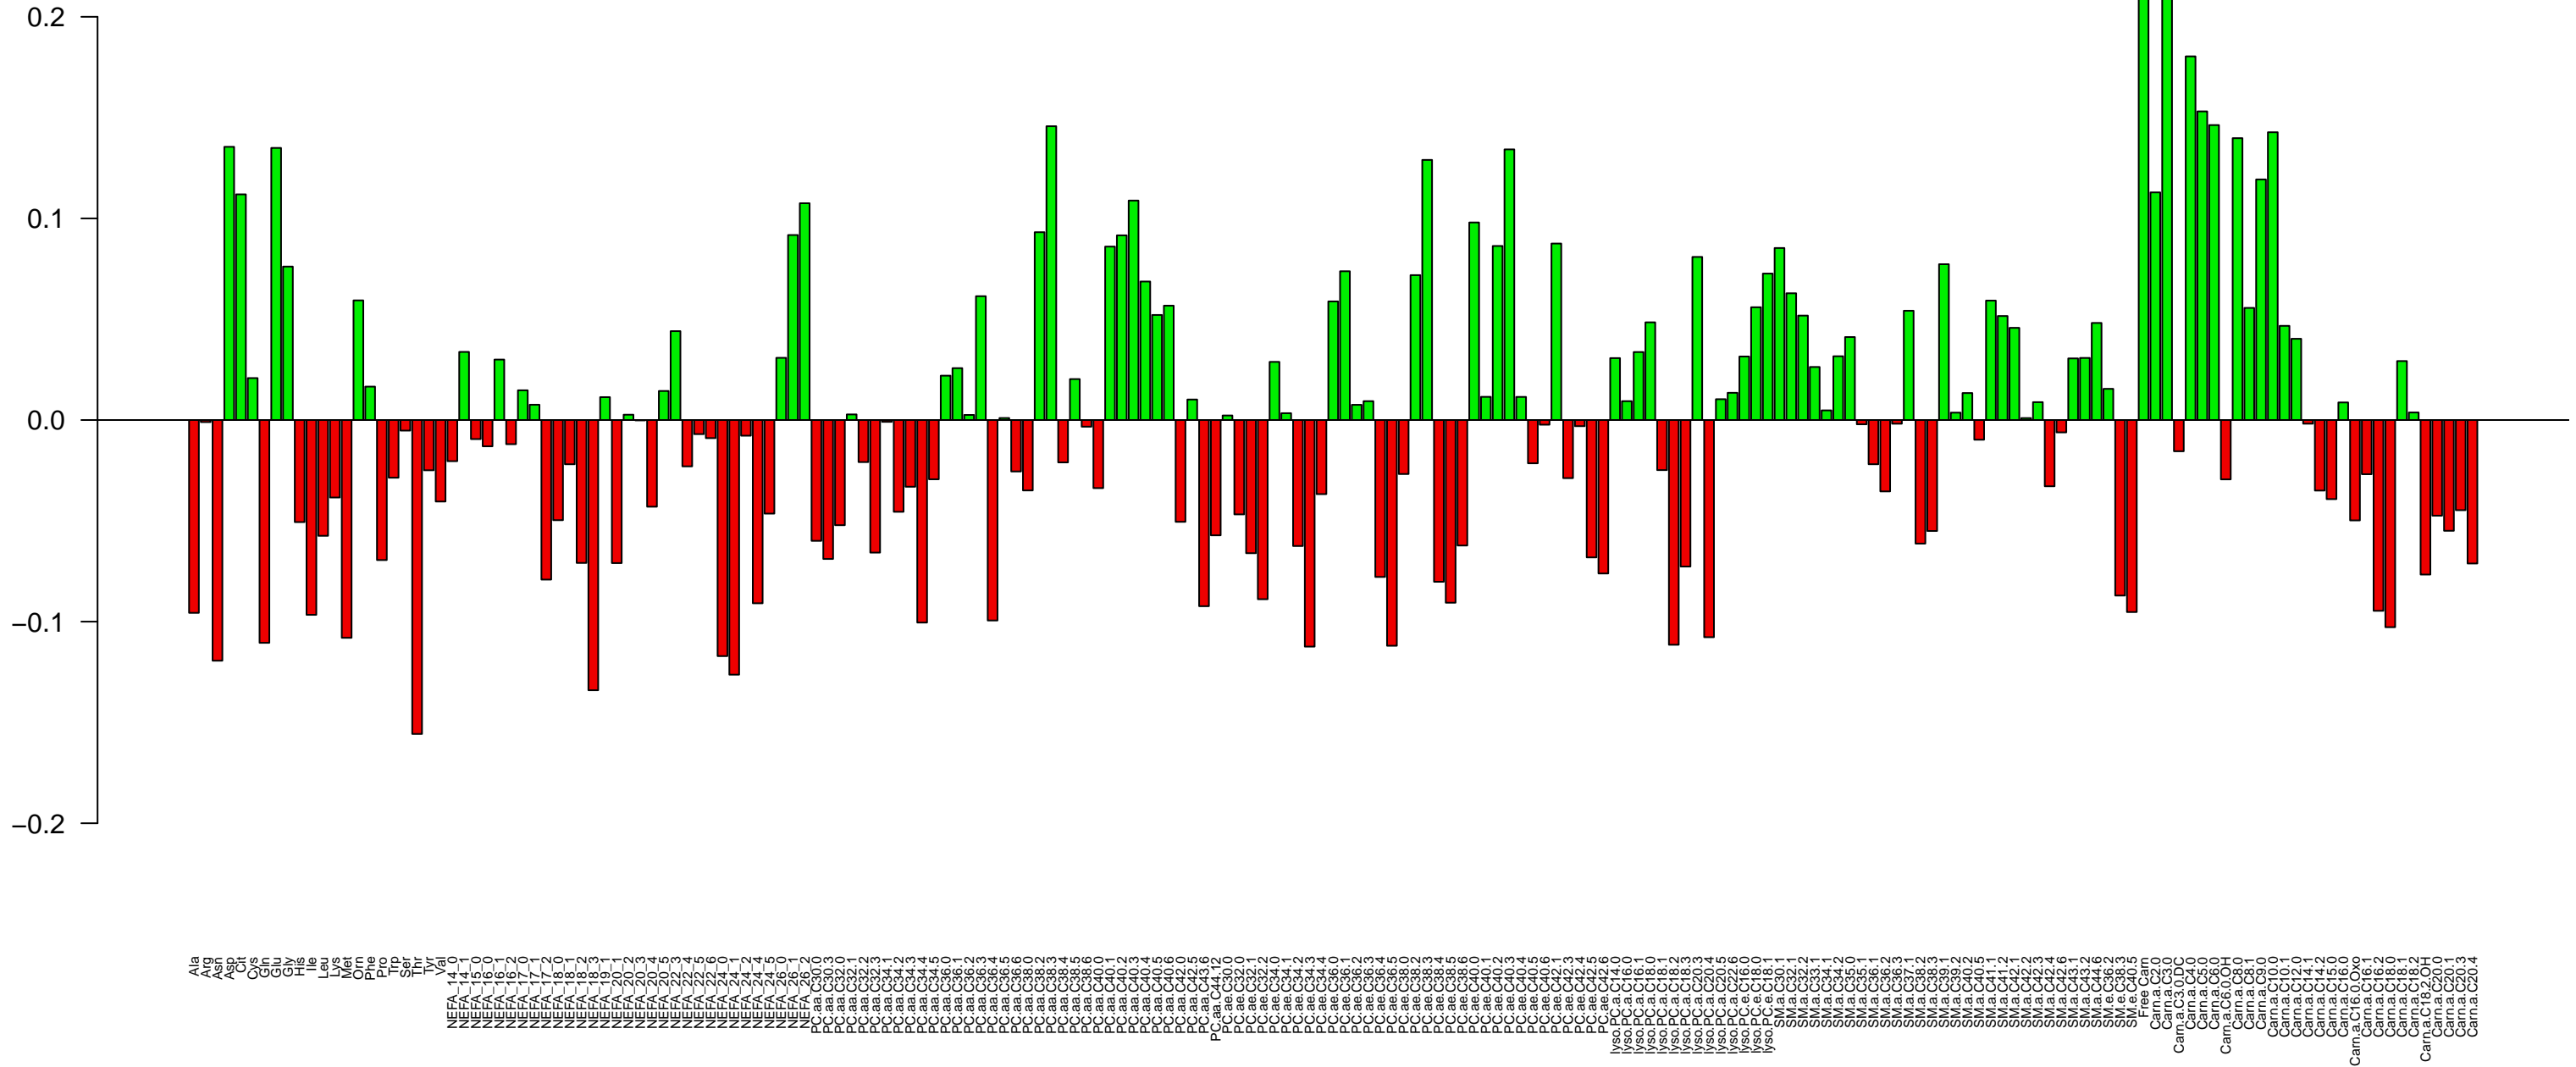















# Mother early pregnancy – PC 20 Loadings

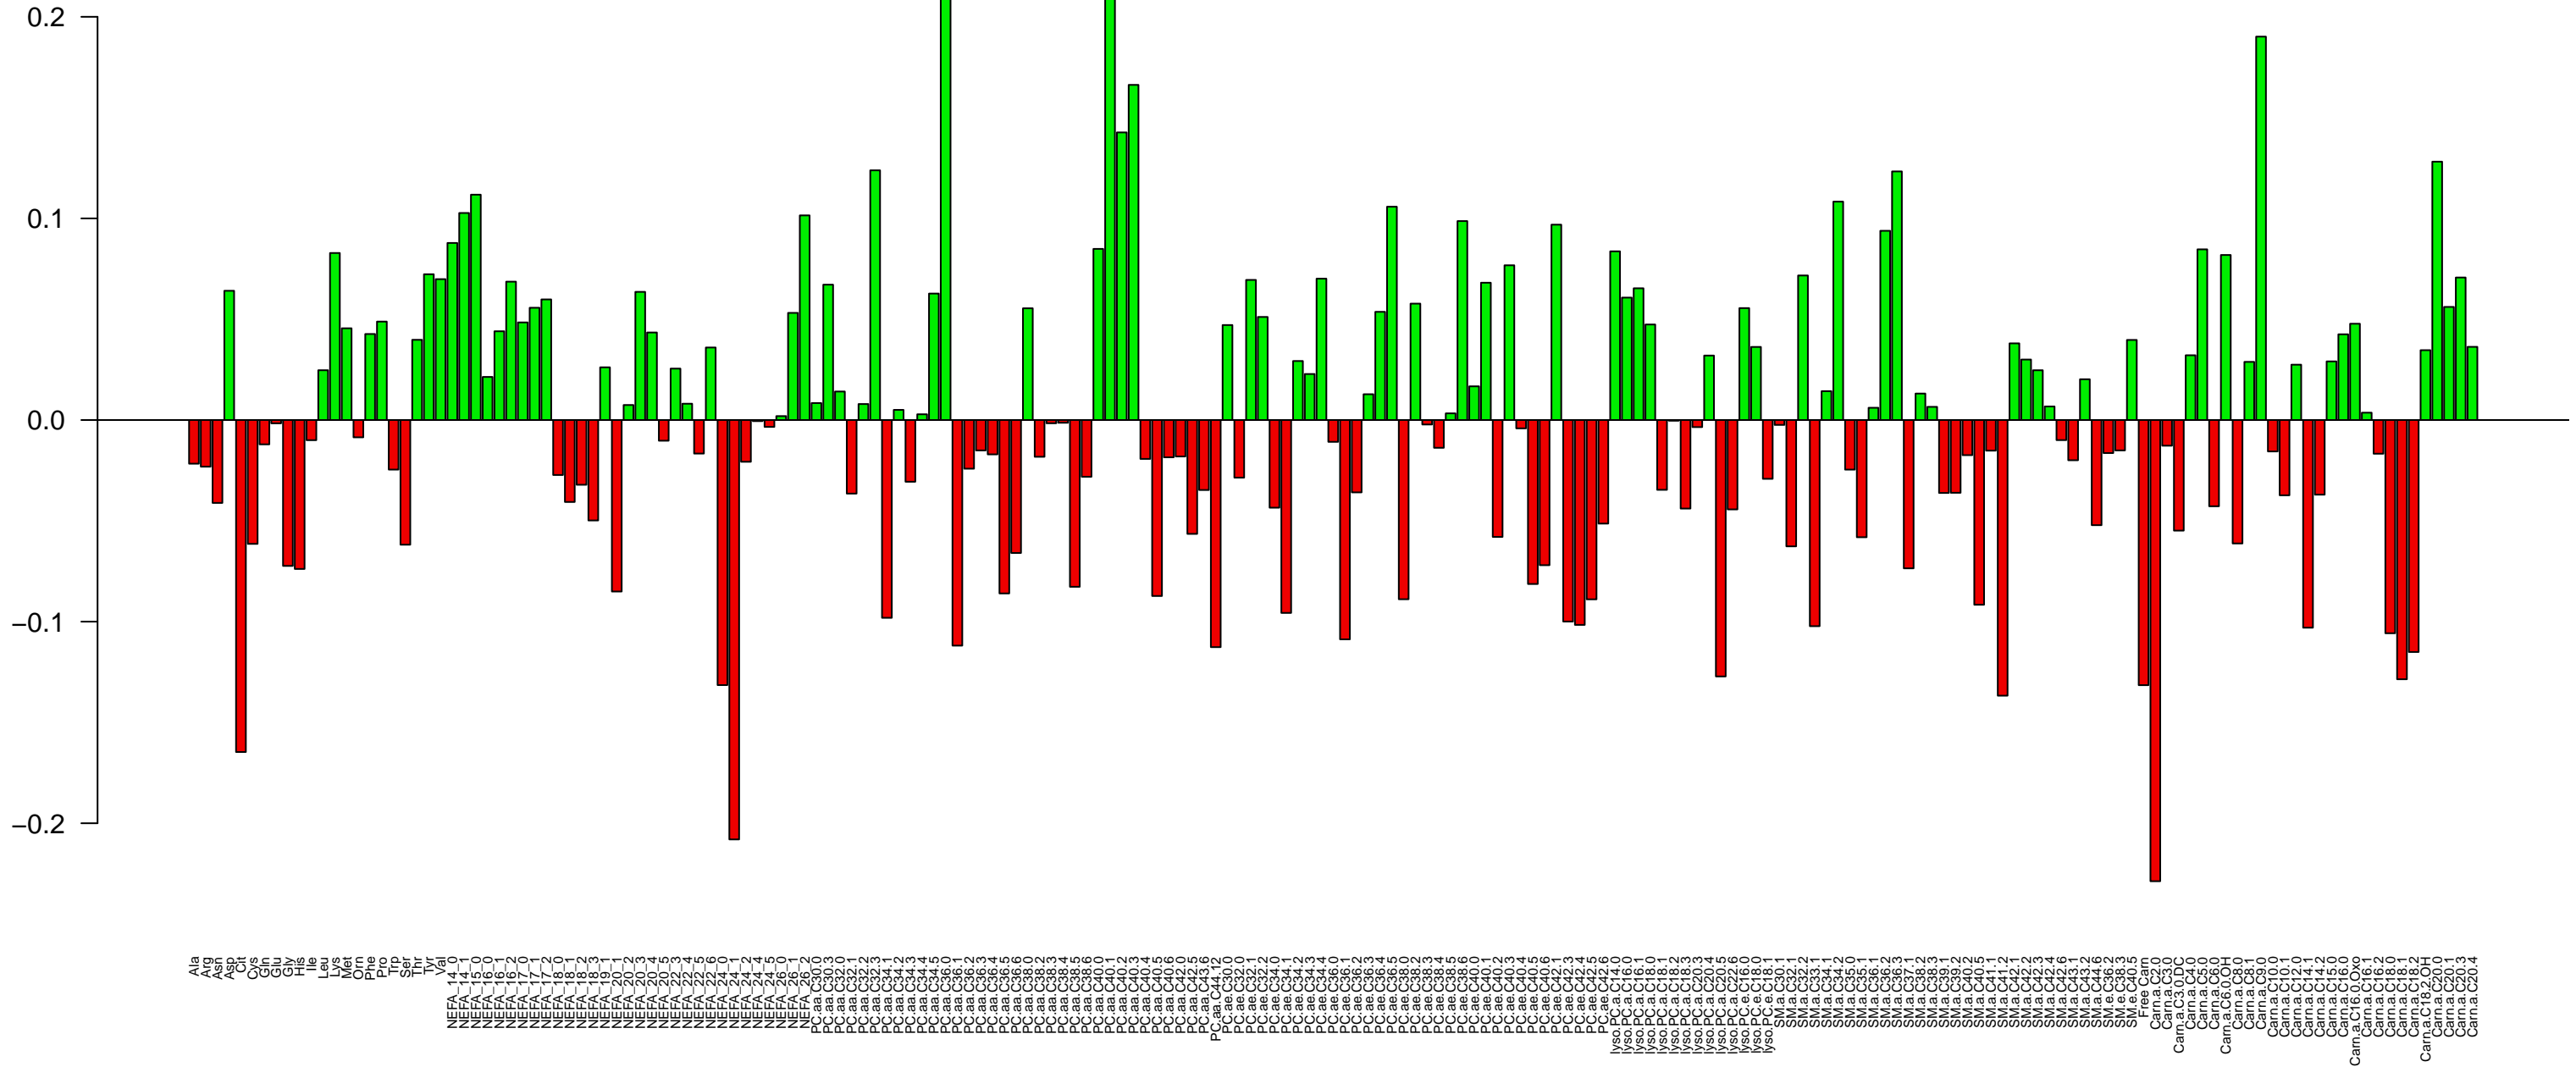

# Mother early pregnancy – PC 21 Loadings

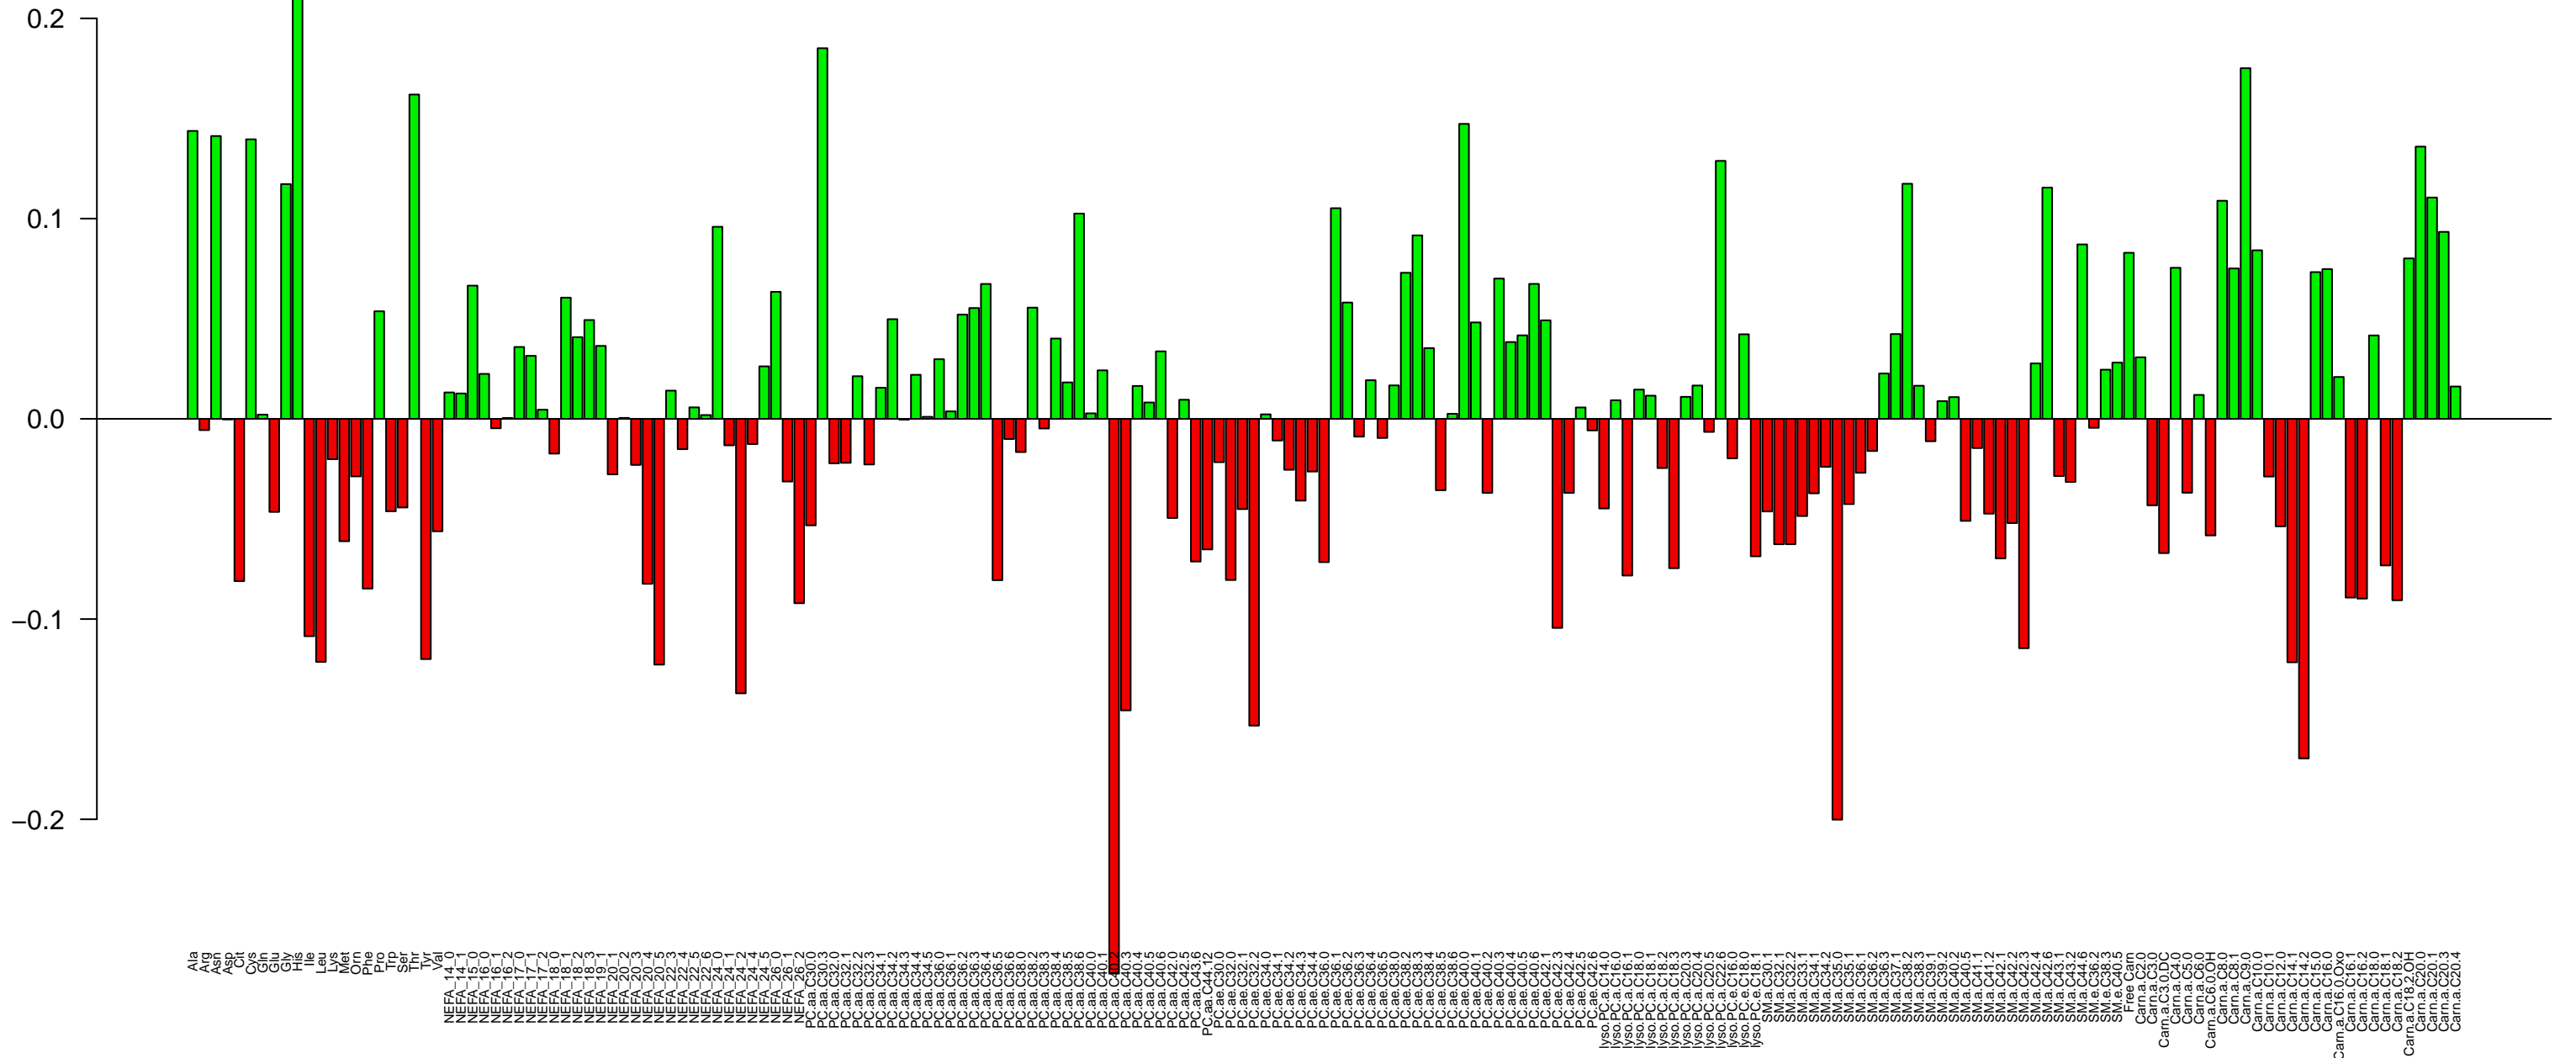

# Mother early pregnancy – PC 22 Loadings

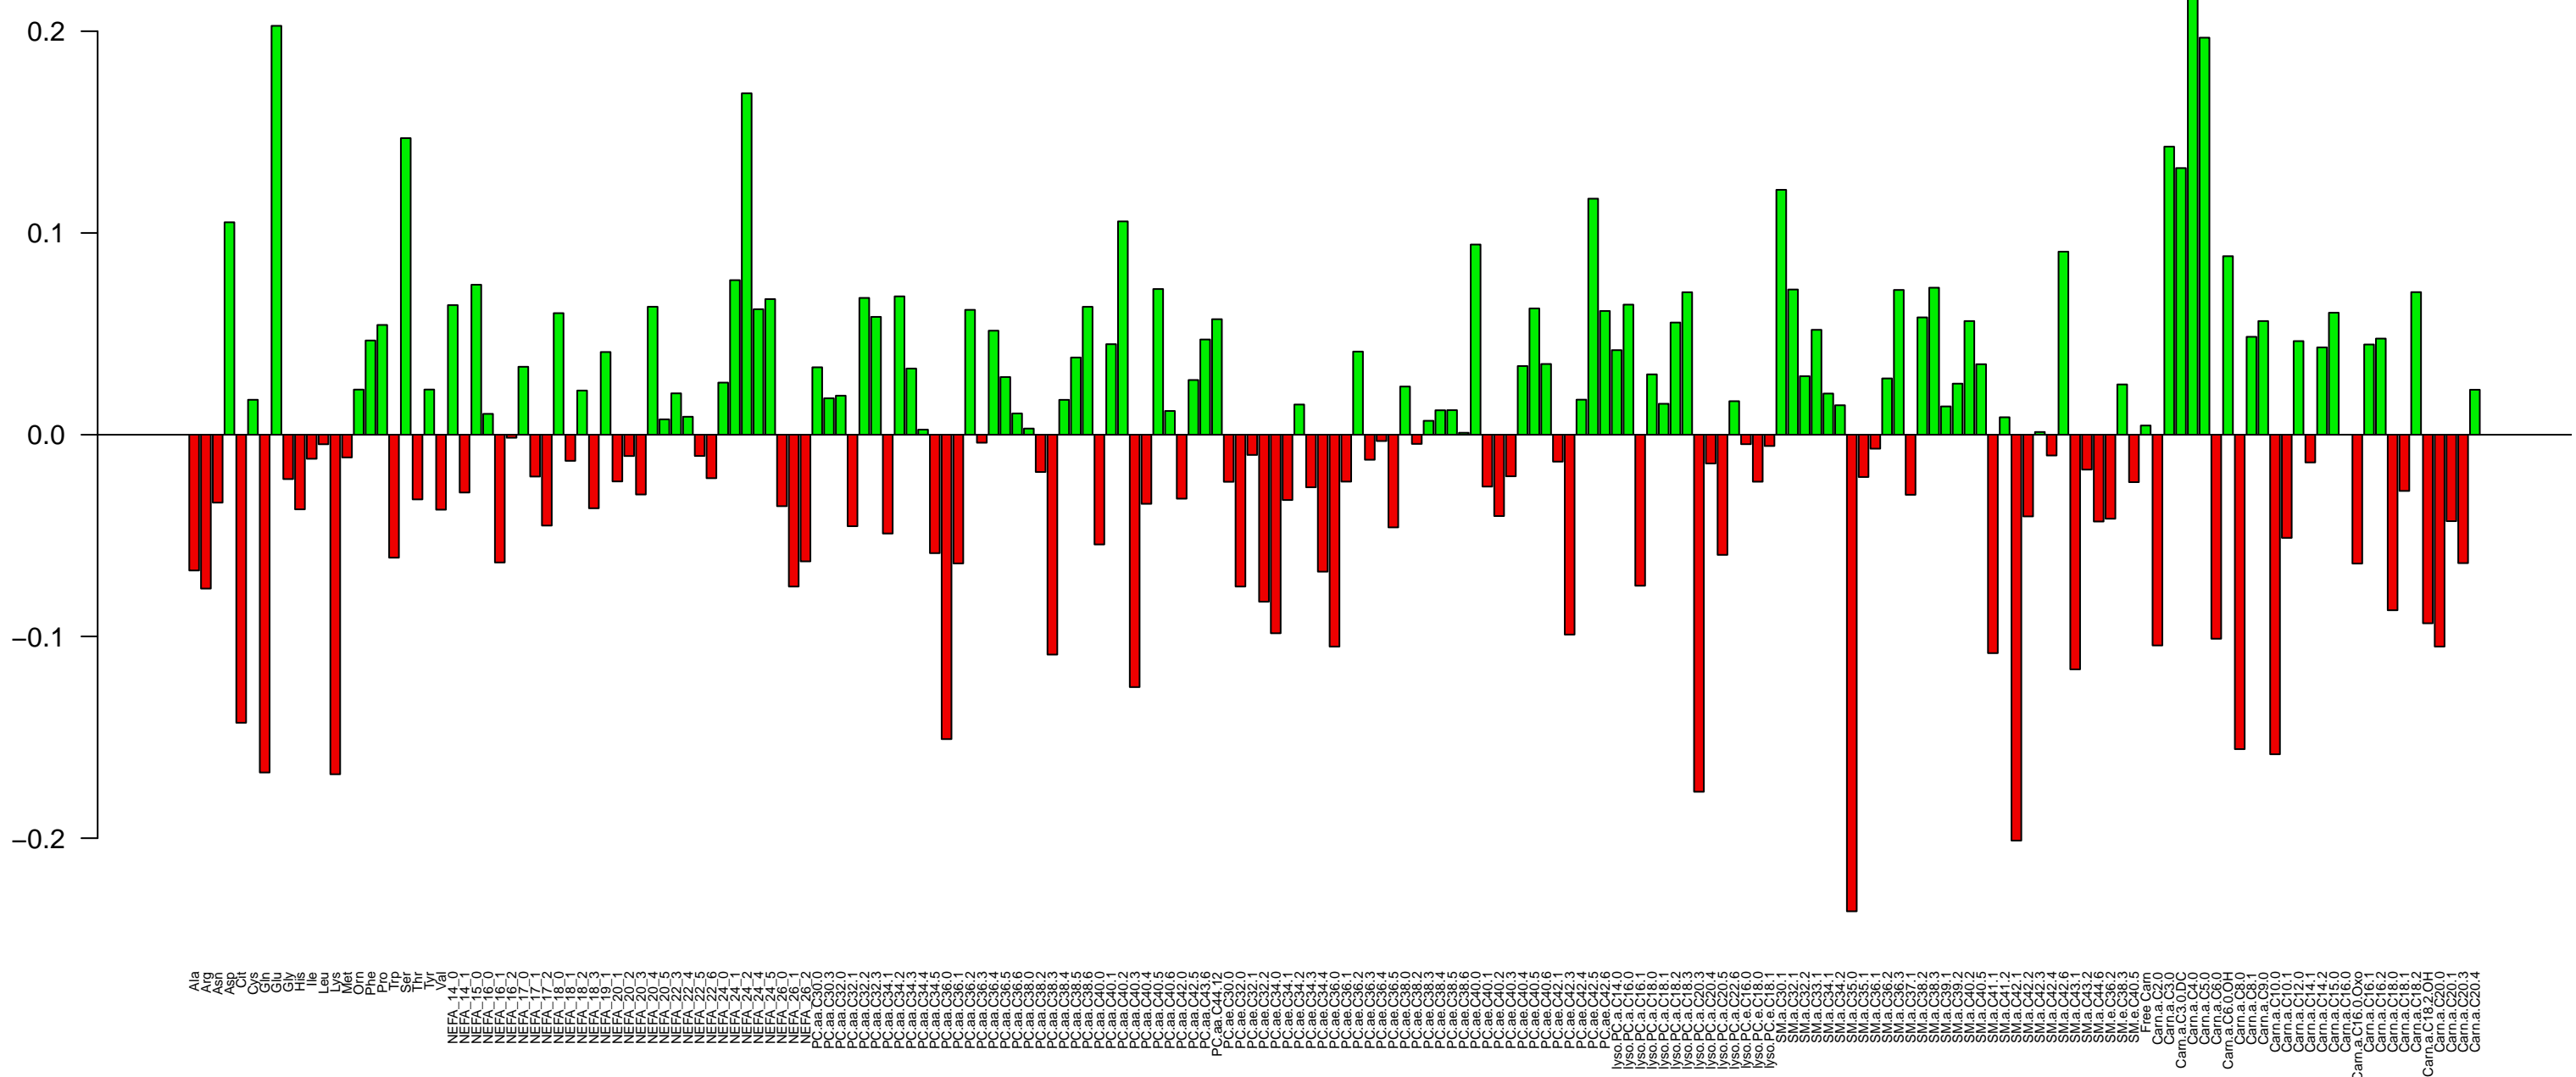



### Mother early pregnancy – PC 24 Loadings

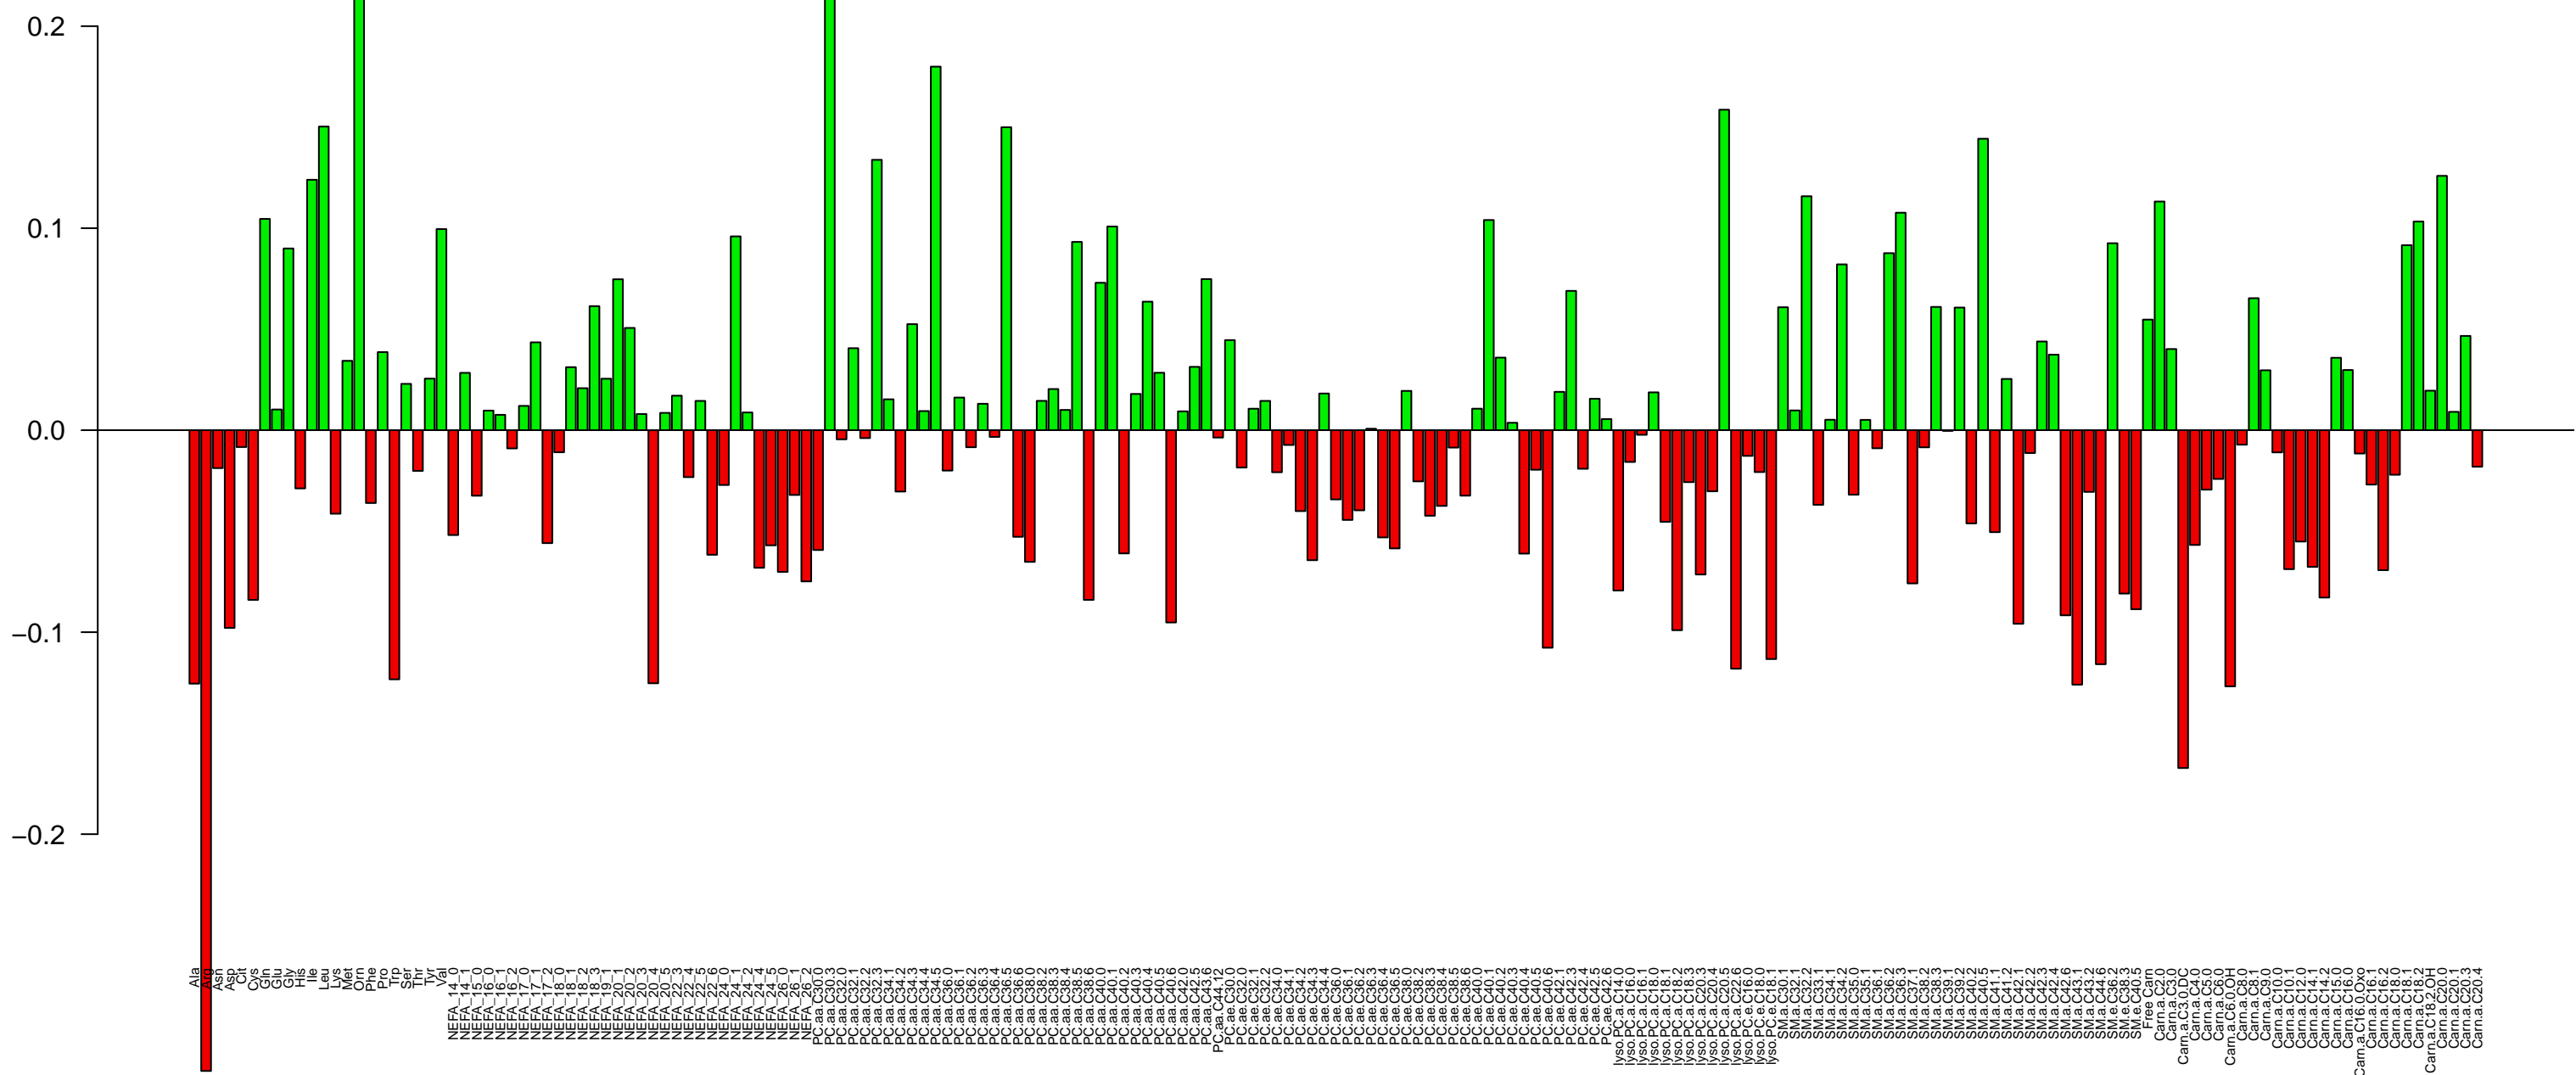



# Mother early pregnancy – PC 25 Loadings

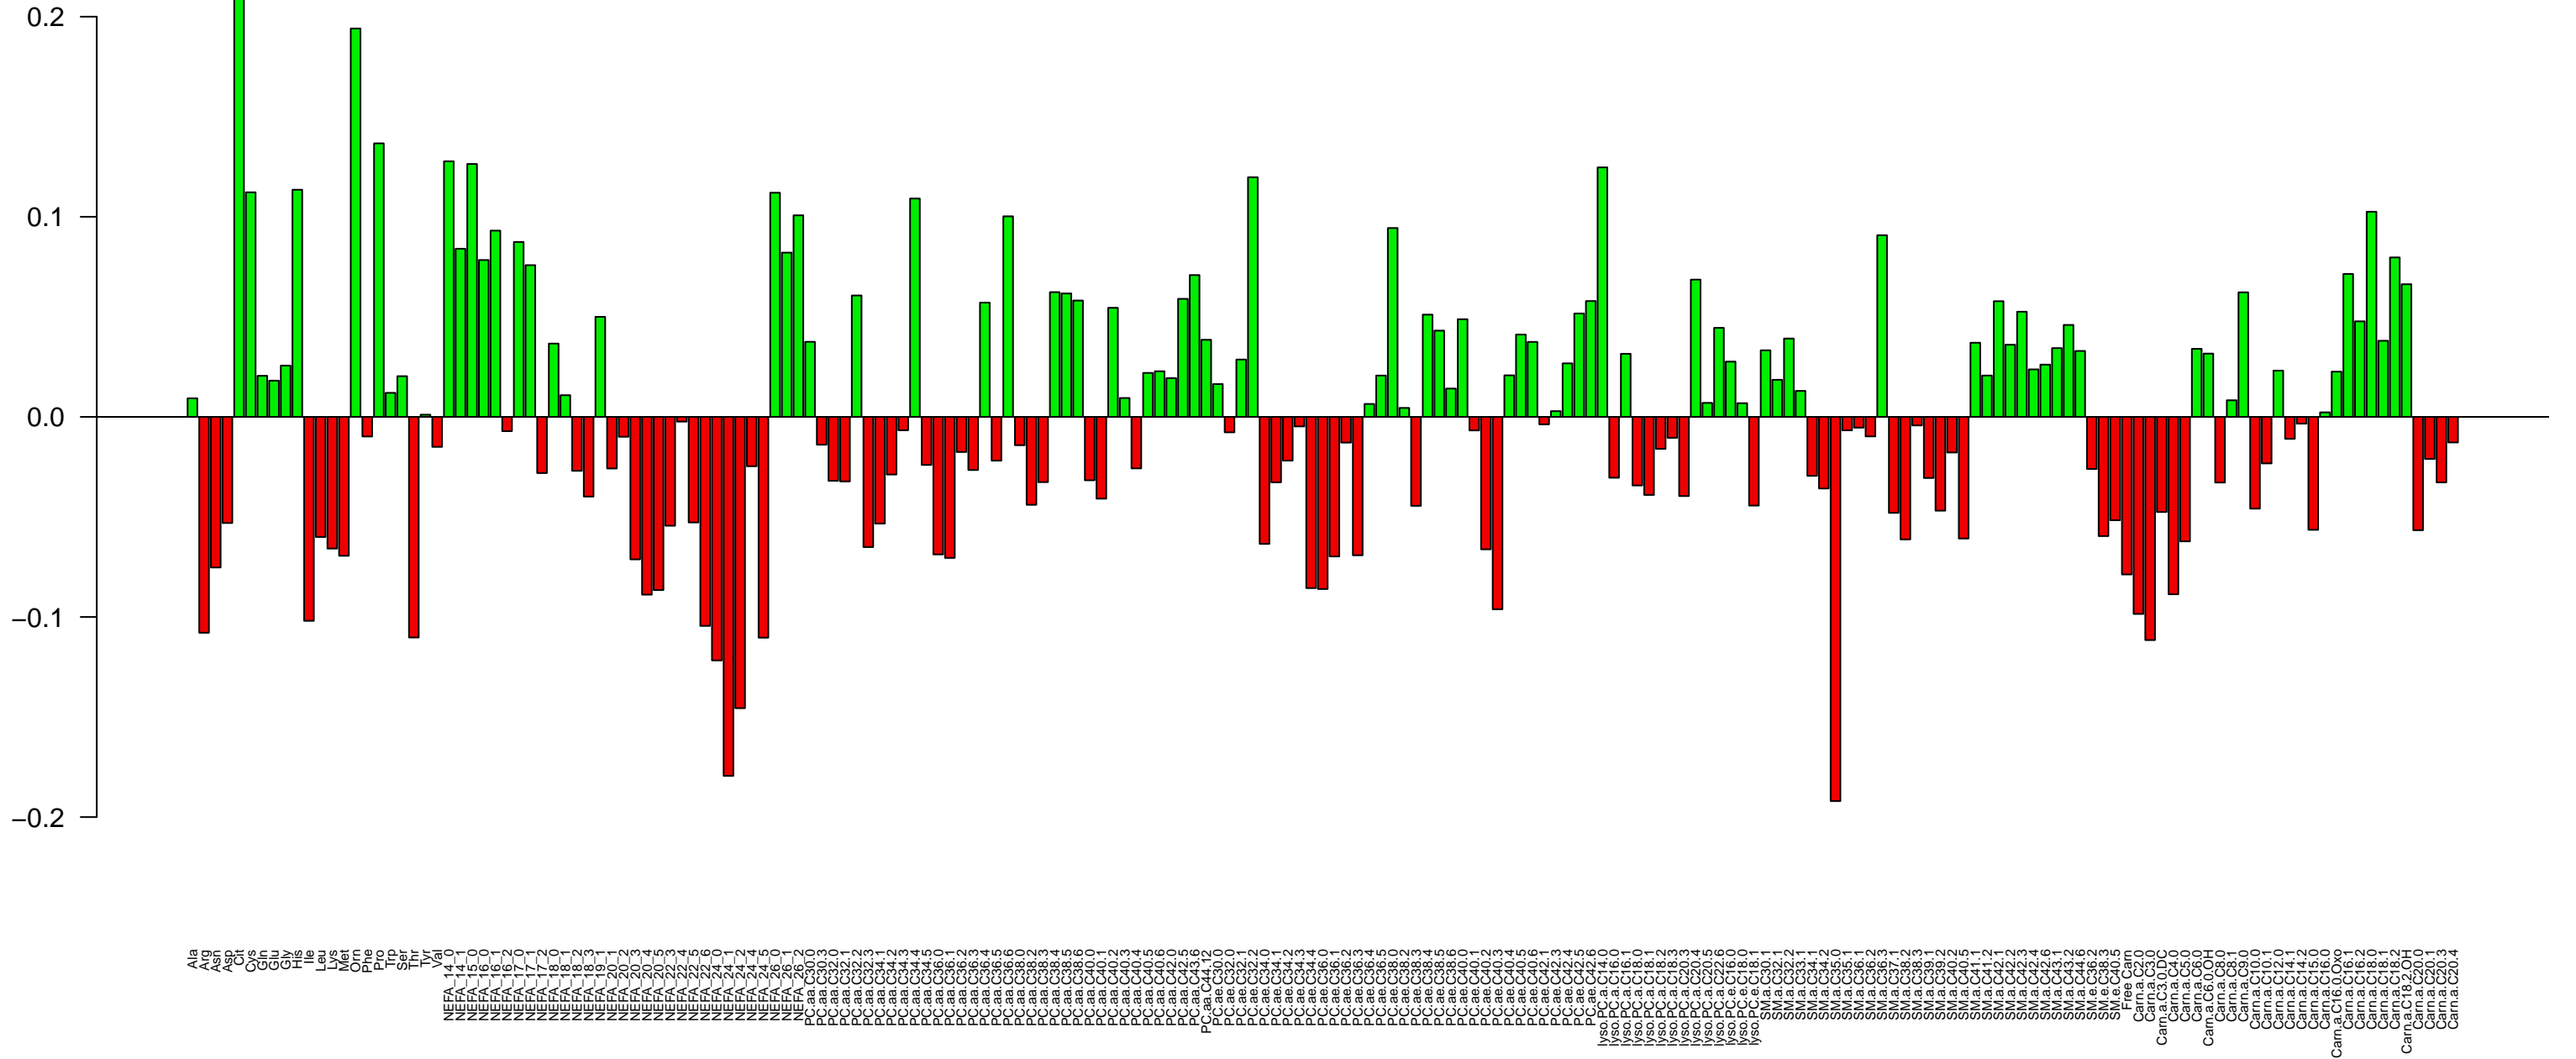

Supplement: 11306_2020_1667_MOESM5_ESM.pdf [file 11306_2020_1667_MOESM5_ESM.pdf]
