# Supplementary material for: A population-based resource for intergenerational metabolomics analyses in pregnant women and their children: the Generation R Study
Source: PubMed Central journal article supplement (PMC7089886; doi:10.1007/s11306-020-01667-1), 2020-03-23

# Child age 10 – PC 1 Loadings

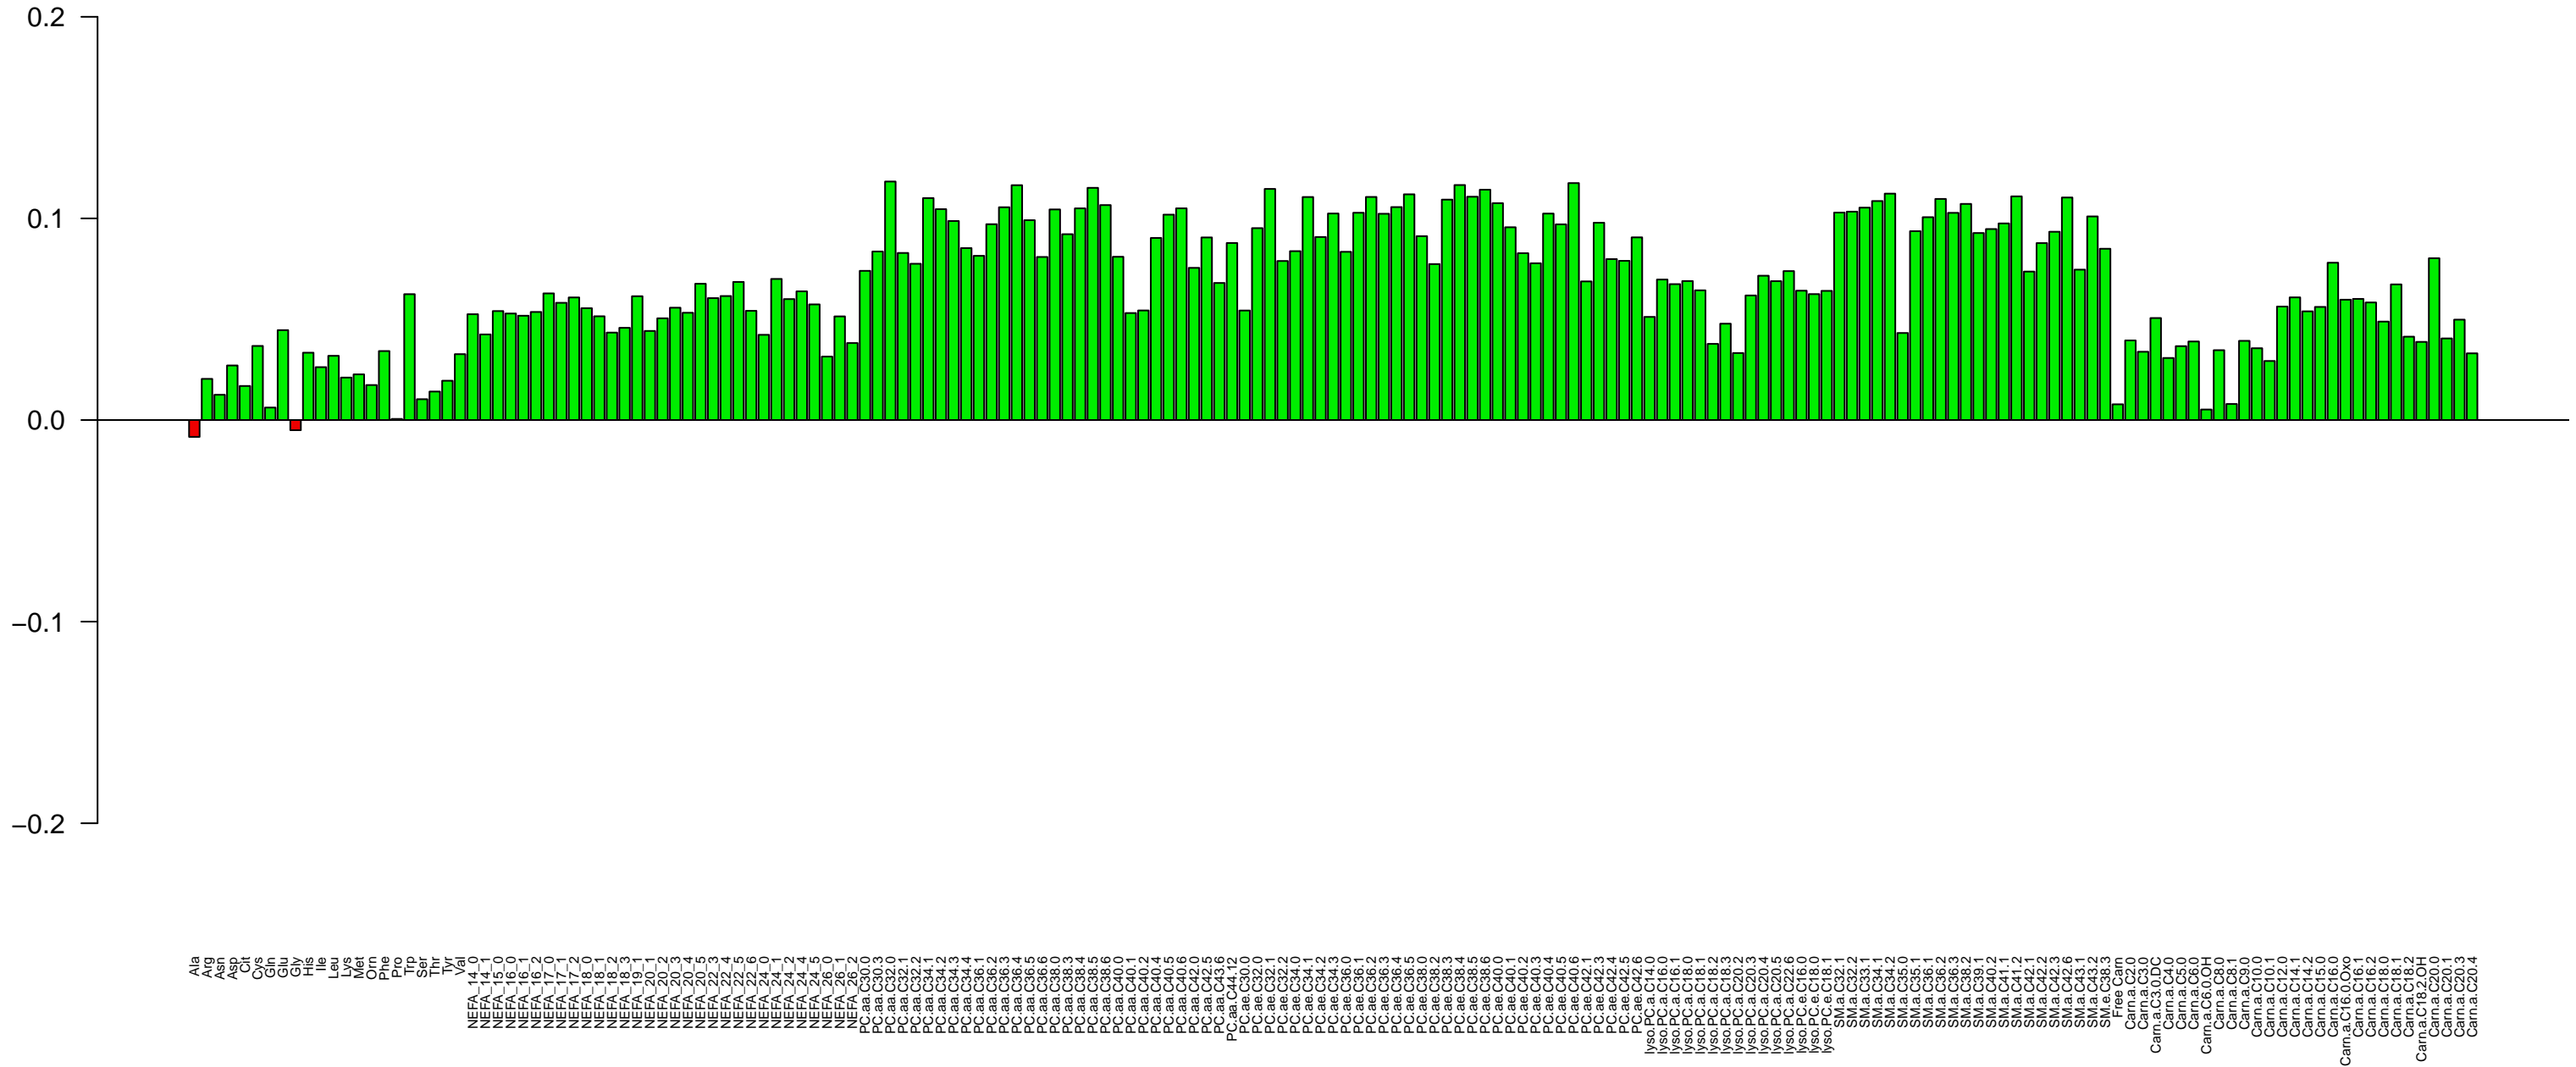

# Child age 10 – PC 2 Loadings

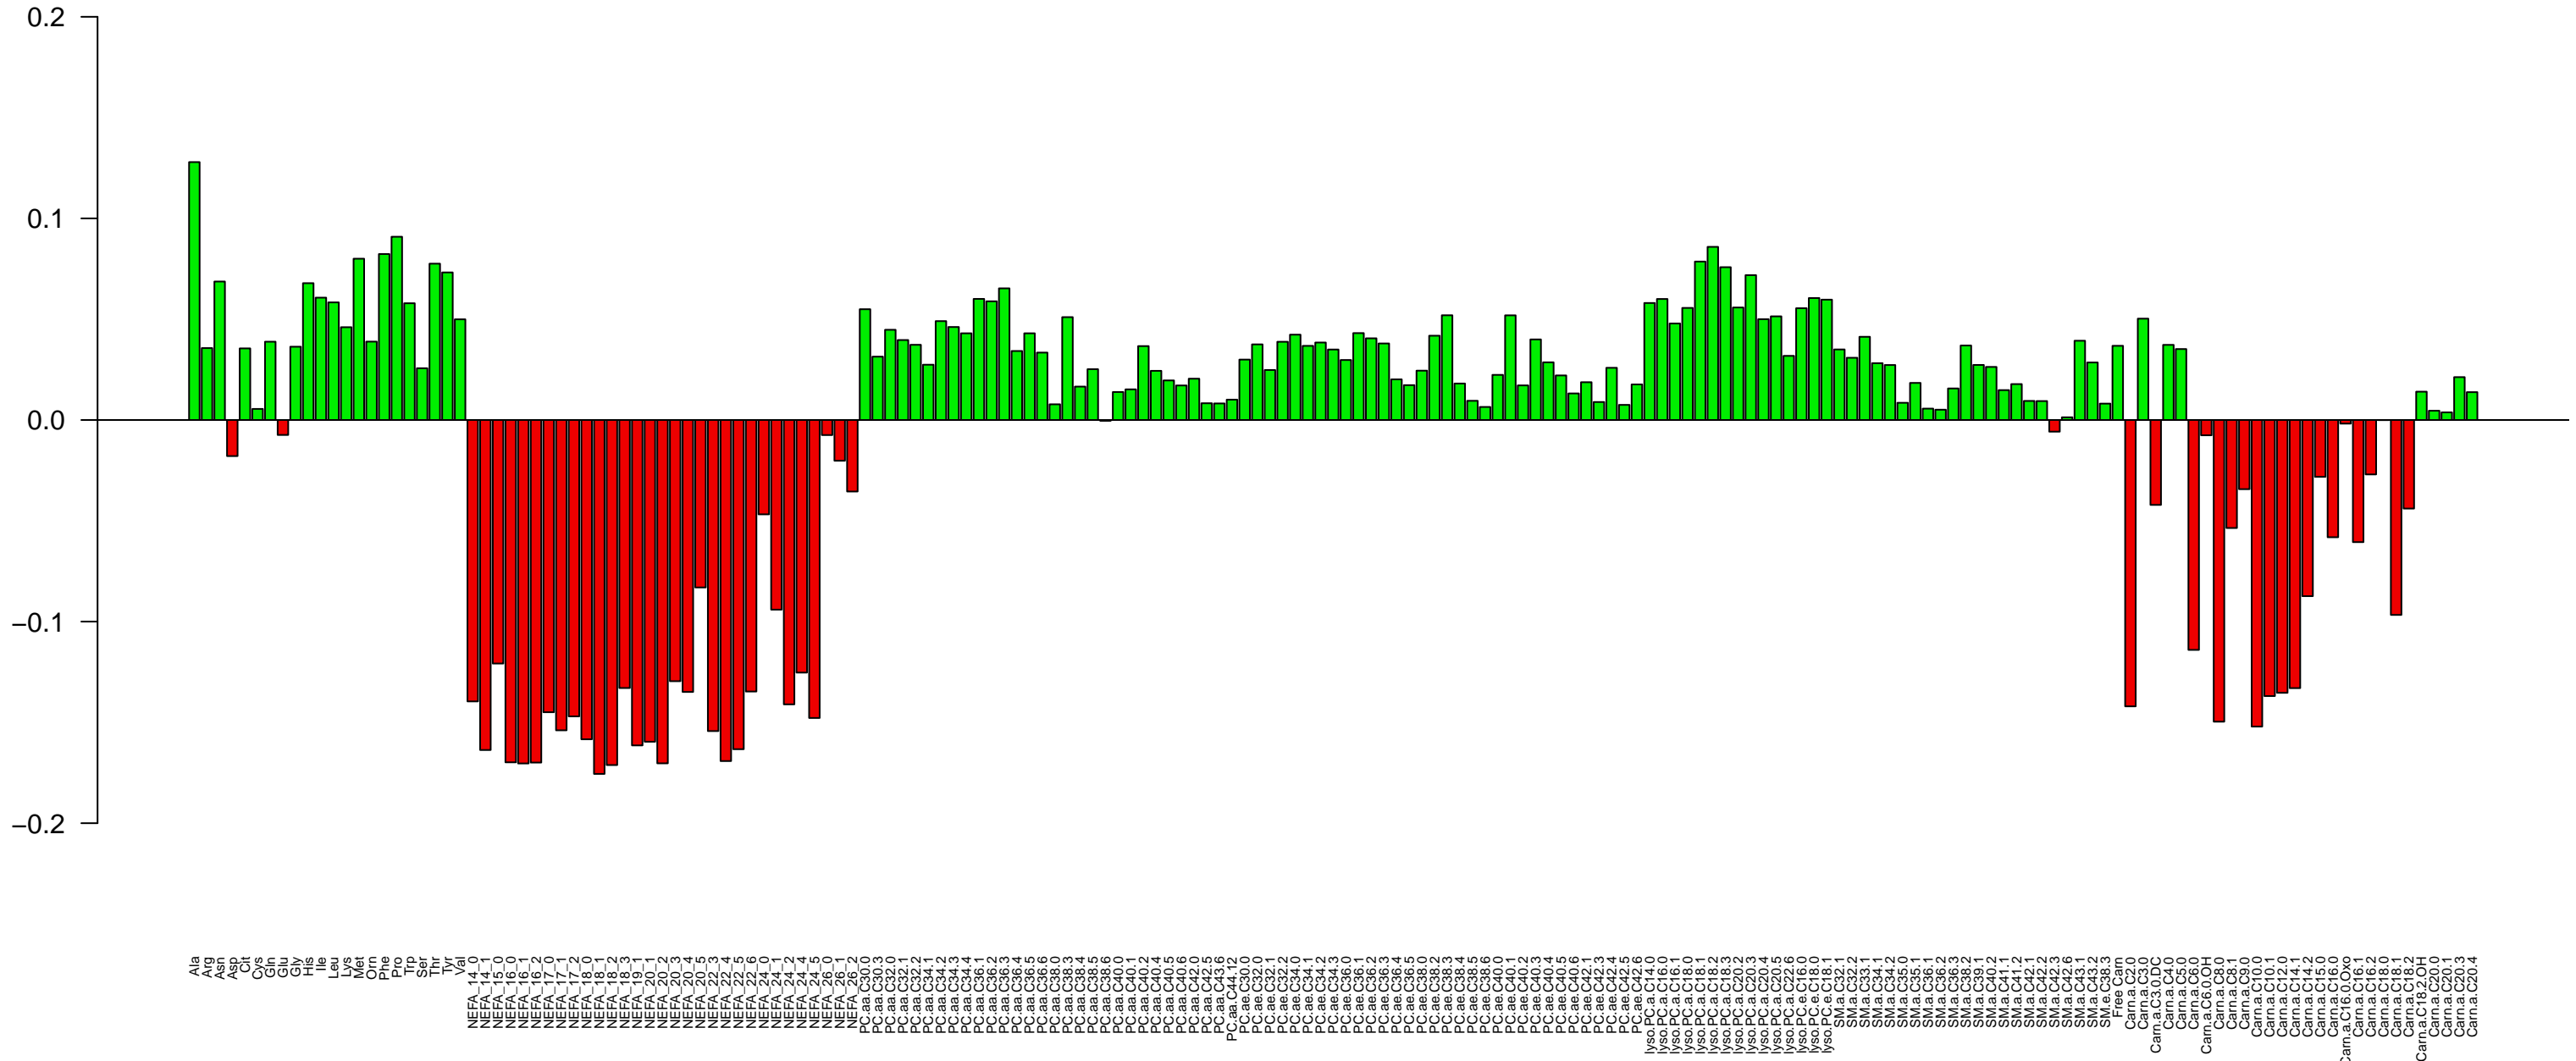

# Child age 10 – PC 3 Loadings

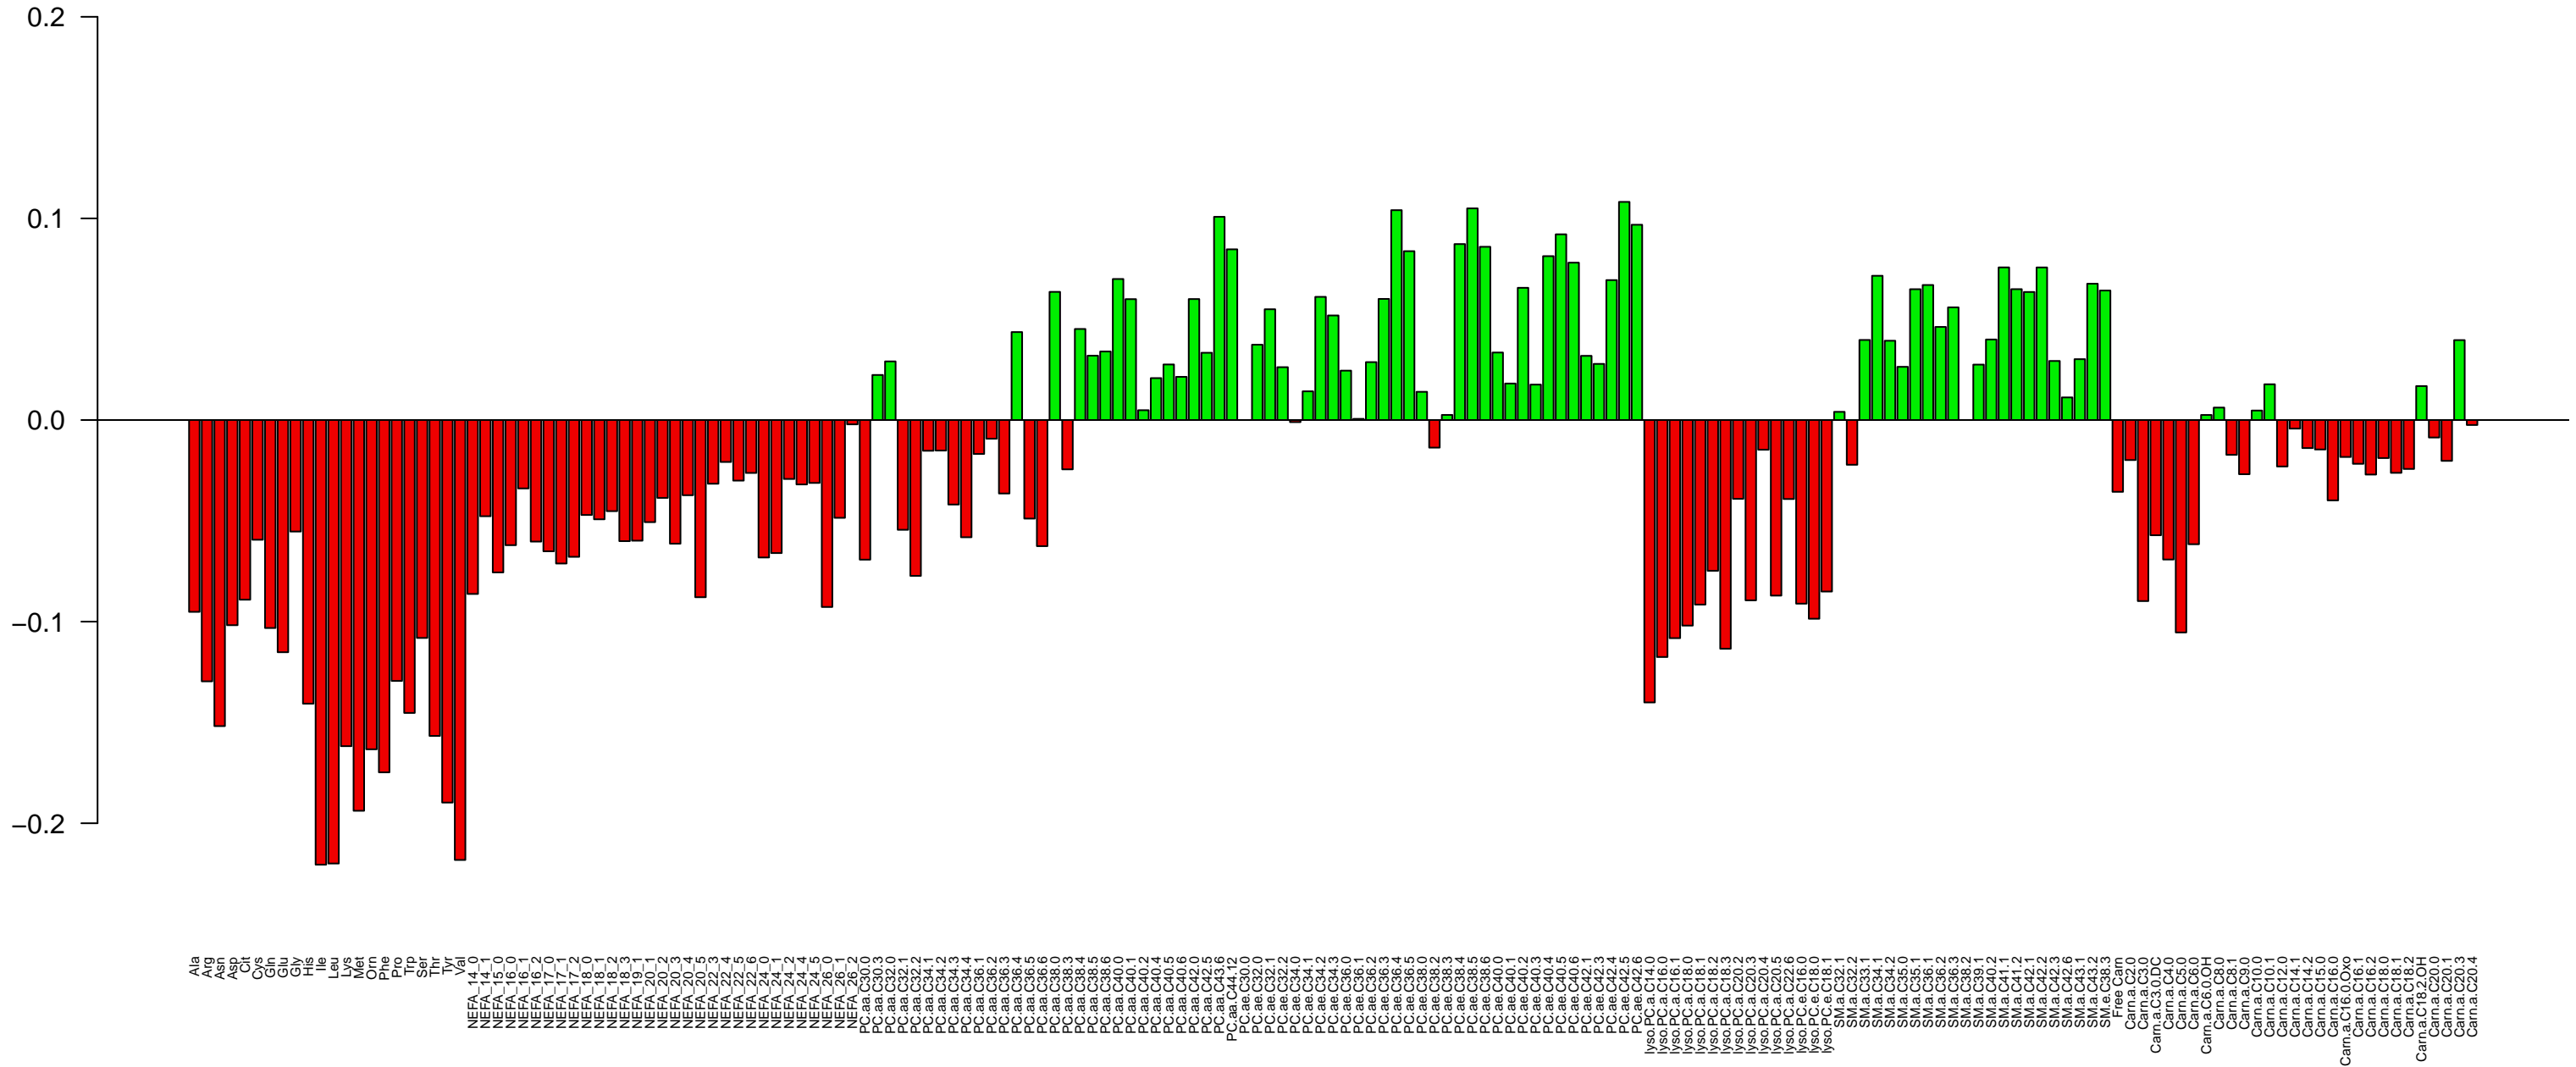

# Child age 10 – PC 4 Loadings

0.2  
0.1  
0.0  
-0.1  
-0.2

Ala  
Arg  
Asn  
Asp  
Cit  
Cis  
Cln  
Civ  
His  
Ile  
Leu  
Lys  
Met  
Orn  
Phe  
Pro  
Trp  
Thr  
Val  
NEFA\_14\_0  
NEFA\_14\_1  
NEFA\_15\_0  
NEFA\_16\_0  
NEFA\_16\_1  
NEFA\_16\_2  
NEFA\_17\_0  
NEFA\_17\_1  
NEFA\_17\_2  
NEFA\_18\_0  
NEFA\_18\_1  
NEFA\_18\_2  
NEFA\_18\_3  
NEFA\_19\_1  
NEFA\_20\_1  
NEFA\_20\_2  
NEFA\_20\_3  
NEFA\_20\_4  
NEFA\_20\_5  
NEFA\_22\_3  
NEFA\_22\_4  
NEFA\_22\_5  
NEFA\_22\_6  
NEFA\_24\_0  
NEFA\_24\_1  
NEFA\_24\_2  
NEFA\_24\_4  
NEFA\_24\_5  
NEFA\_26\_0  
NEFA\_26\_1  
NEFA\_26\_2  
PC\_aa\_C30\_0  
PC\_aa\_C30\_3  
PC\_aa\_C32\_0  
PC\_aa\_C32\_1  
PC\_aa\_C32\_2  
PC\_aa\_C34\_1  
PC\_aa\_C34\_2  
PC\_aa\_C34\_3  
PC\_aa\_C34\_4  
PC\_aa\_C36\_1  
PC\_aa\_C36\_2  
PC\_aa\_C36\_3  
PC\_aa\_C36\_4  
PC\_aa\_C38\_0  
PC\_aa\_C38\_2  
PC\_aa\_C38\_3  
PC\_aa\_C38\_4  
PC\_aa\_C38\_5  
PC\_aa\_C38\_6  
PC\_aa\_C40\_0  
PC\_aa\_C40\_1  
PC\_aa\_C40\_2  
PC\_aa\_C40\_4  
PC\_aa\_C40\_5  
PC\_aa\_C40\_6  
PC\_aa\_C42\_0  
PC\_aa\_C42\_5  
PC\_aa\_C42\_9  
PC\_ee\_C30\_0  
PC\_ee\_C32\_0  
PC\_ee\_C32\_1  
PC\_ee\_C32\_2  
PC\_ee\_C34\_0  
PC\_ee\_C34\_1  
PC\_ee\_C34\_2  
PC\_ee\_C34\_3  
PC\_ee\_C36\_0  
PC\_ee\_C36\_1  
PC\_ee\_C36\_2  
PC\_ee\_C36\_3  
PC\_ee\_C36\_4  
PC\_ee\_C38\_0  
PC\_ee\_C38\_2  
PC\_ee\_C38\_3  
PC\_ee\_C38\_4  
PC\_ee\_C38\_5  
PC\_ee\_C38\_6  
PC\_ee\_C40\_0  
PC\_ee\_C40\_1  
PC\_ee\_C40\_2  
PC\_ee\_C40\_3  
PC\_ee\_C40\_4  
PC\_ee\_C40\_5  
PC\_ee\_C40\_6  
PC\_ee\_C42\_1  
PC\_ee\_C42\_3  
PC\_ee\_C42\_4  
PC\_ee\_C42\_5  
Iyso\_PC\_a\_C14\_0  
Iyso\_PC\_a\_C16\_0  
Iyso\_PC\_a\_C16\_1  
Iyso\_PC\_a\_C18\_0  
Iyso\_PC\_a\_C18\_1  
Iyso\_PC\_a\_C18\_2  
Iyso\_PC\_a\_C18\_3  
Iyso\_PC\_a\_C20\_2  
Iyso\_PC\_a\_C20\_3  
Iyso\_PC\_a\_C20\_4  
Iyso\_PC\_a\_C20\_5  
Iyso\_PC\_a\_C22\_0  
Iyso\_PC\_a\_C22\_6  
Iyso\_PC\_e\_C18\_0  
Iyso\_PC\_e\_C18\_1  
Iyso\_PC\_e\_C18\_2  
SM\_a\_C32\_1  
SM\_a\_C32\_2  
SM\_a\_C33\_1  
SM\_a\_C34\_1  
SM\_a\_C34\_2  
SM\_a\_C35\_0  
SM\_a\_C35\_1  
SM\_a\_C36\_1  
SM\_a\_C36\_2  
SM\_a\_C36\_3  
SM\_a\_C38\_2  
SM\_a\_C40\_1  
SM\_a\_C40\_2  
SM\_a\_C41\_1  
SM\_a\_C41\_2  
SM\_a\_C42\_1  
SM\_a\_C42\_2  
SM\_a\_C42\_3  
SM\_a\_C43\_1  
SM\_a\_C43\_2  
SM\_e\_C38\_3  
Free Carn  
Carn.a\_C20  
Carn.a\_C30  
Carn.a\_C30.DC  
Carn.a\_C40  
Carn.a\_C60  
Carn.a\_C80  
Carn.a\_C80.OH  
Carn.a\_C81  
Carn.a\_C81  
Carn.a\_C90  
Carn.a\_C100  
Carn.a\_C100.1  
Carn.a\_C101  
Carn.a\_C120  
Carn.a\_C14.1  
Carn.a\_C14.2  
Carn.a\_C15.0  
Carn.a\_C16.0  
Carn.a\_C16.OxO  
Carn.a\_C16.1  
Carn.a\_C18.1  
Carn.a\_C18.2  
Carn.a\_C18.2  
Carn.a\_C18.2.OH  
Carn.a\_C20.0  
Carn.a\_C20.1  
Carn.a\_C20.3  
Carn.a\_C20.4

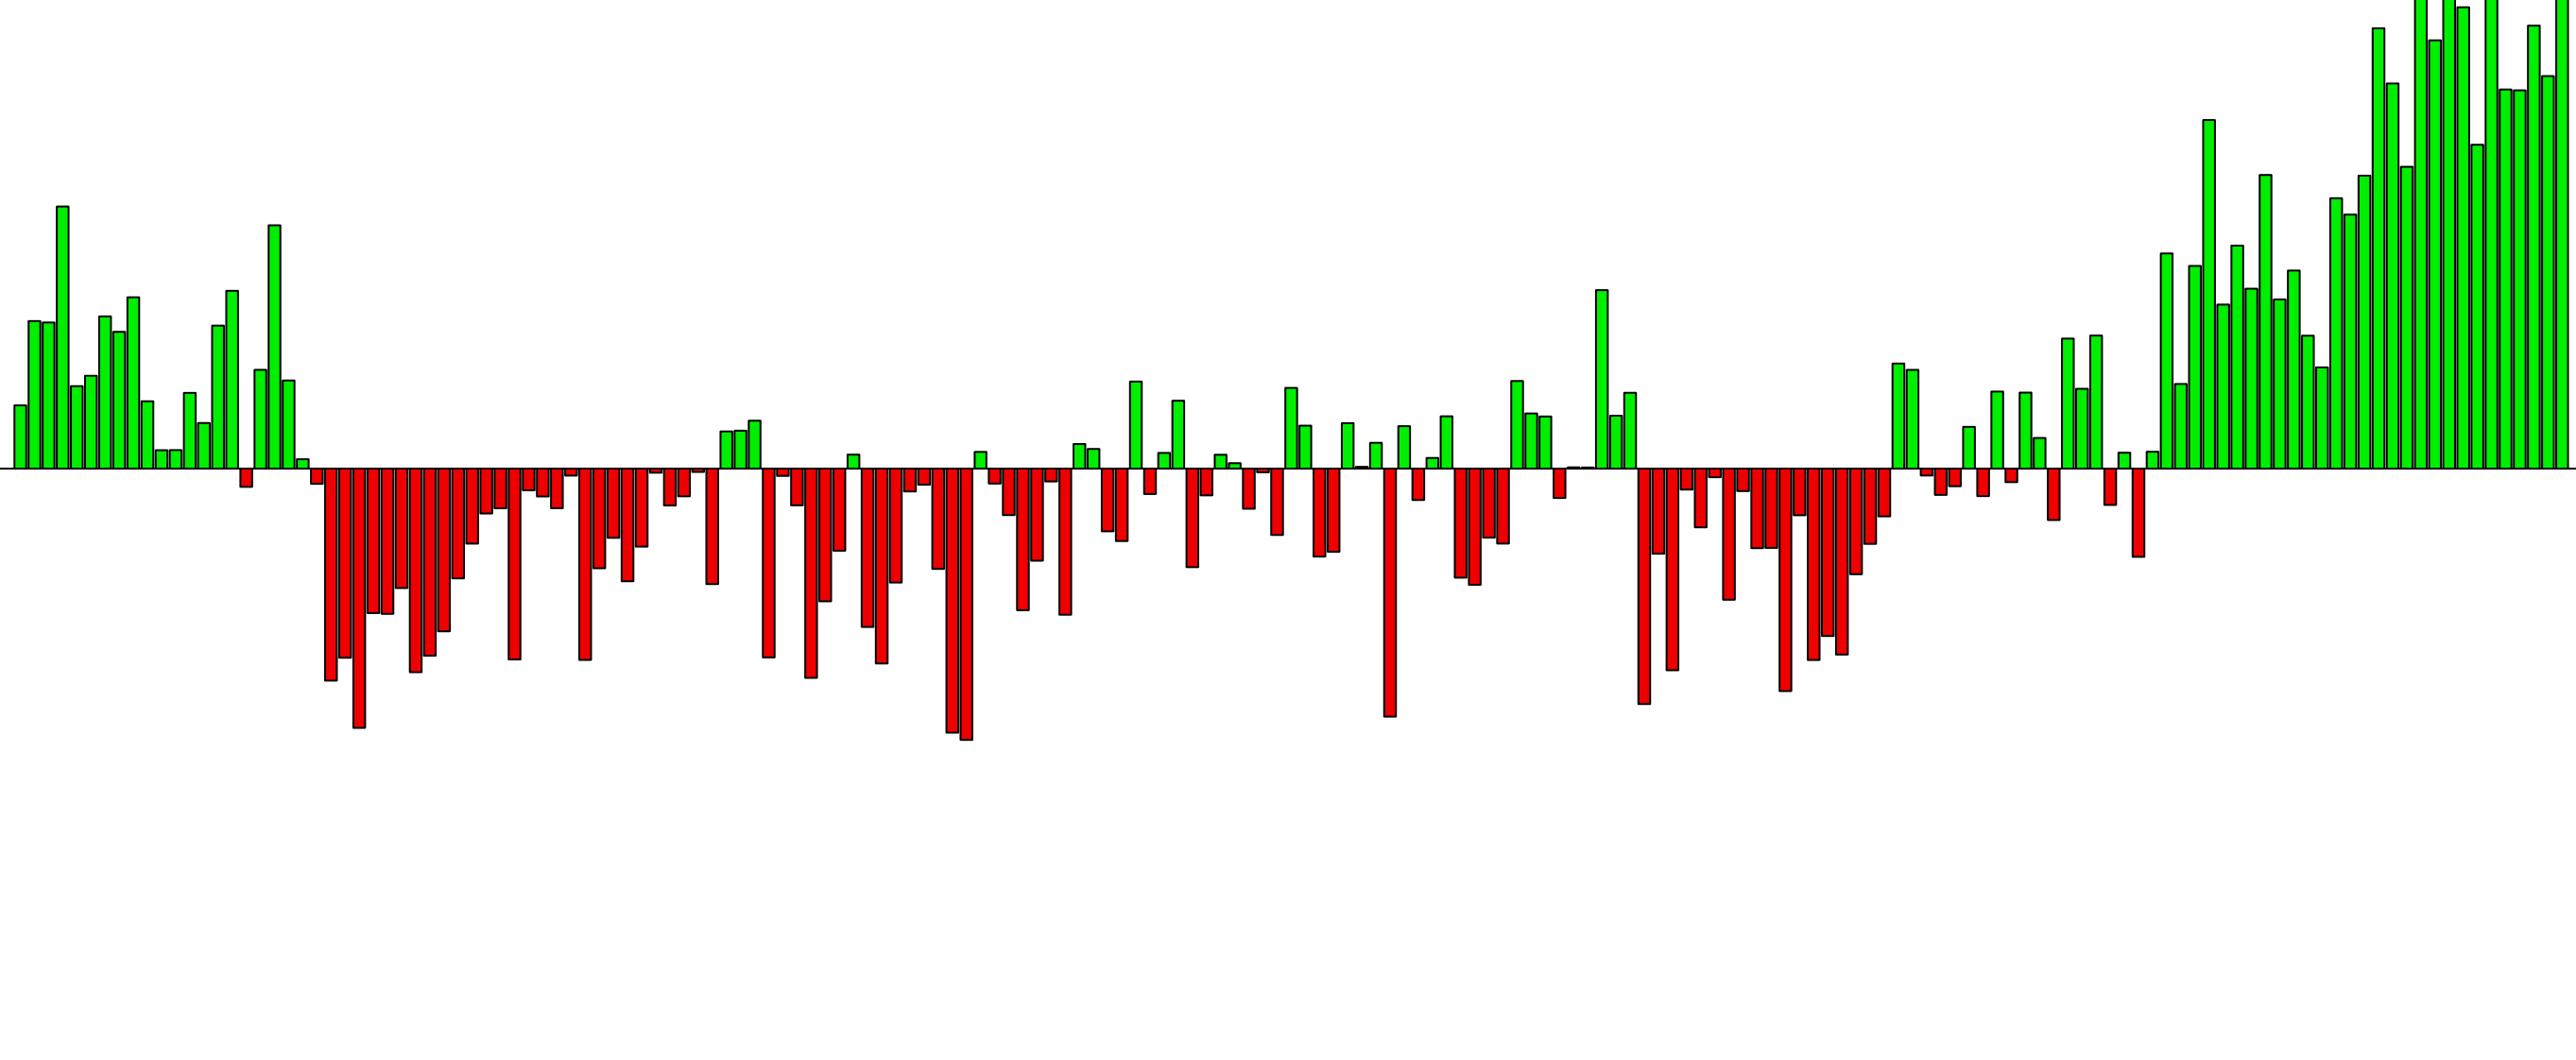

# Child age 10 – PC 5 Loadings

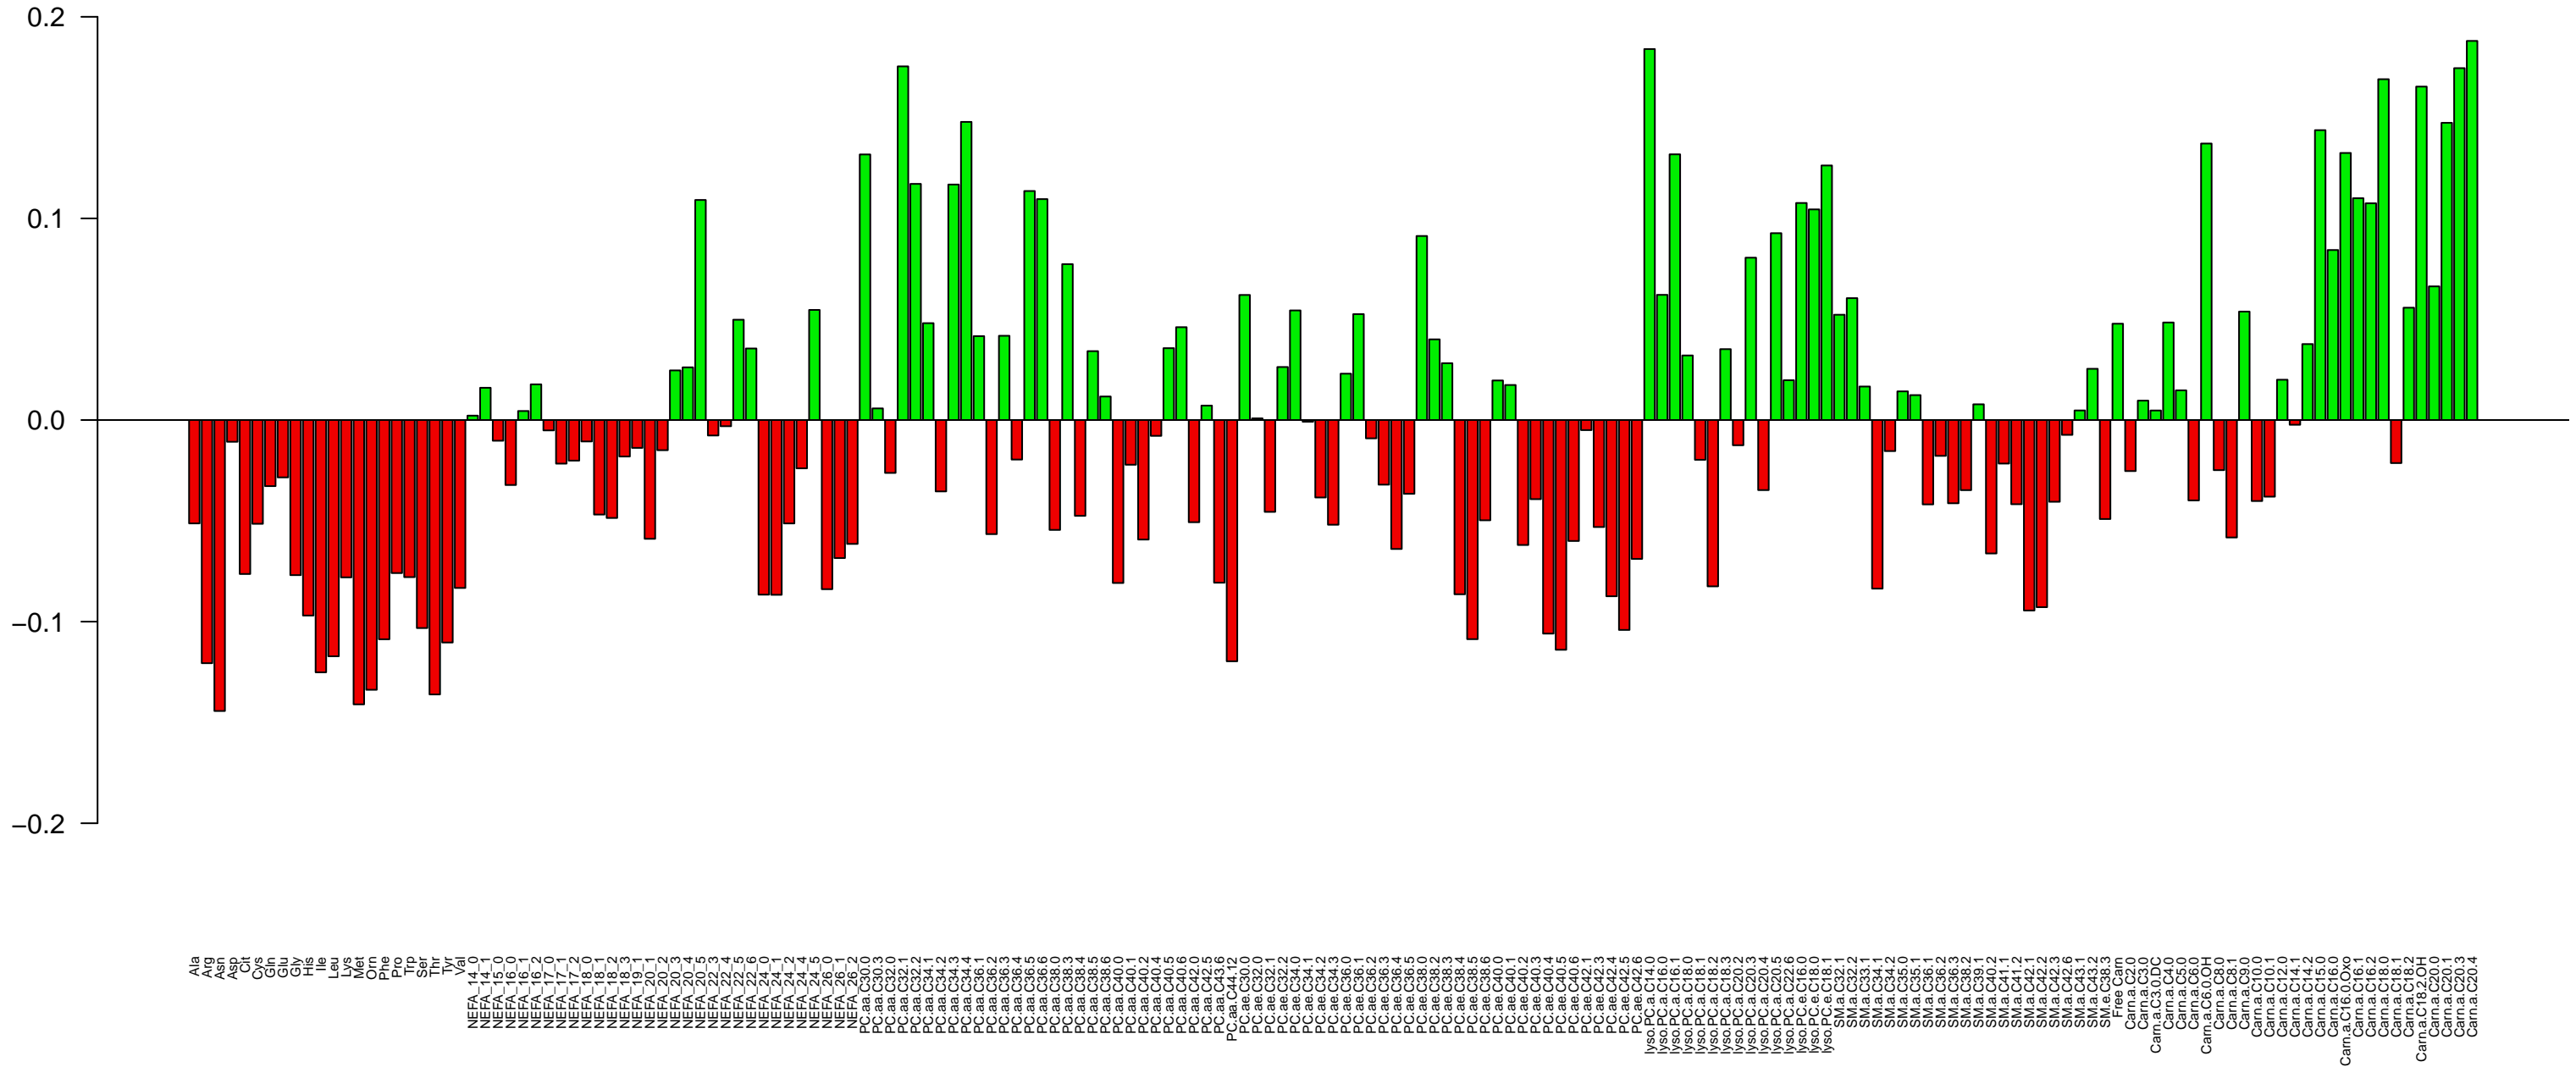

# Child age 10 – PC 6 Loadings

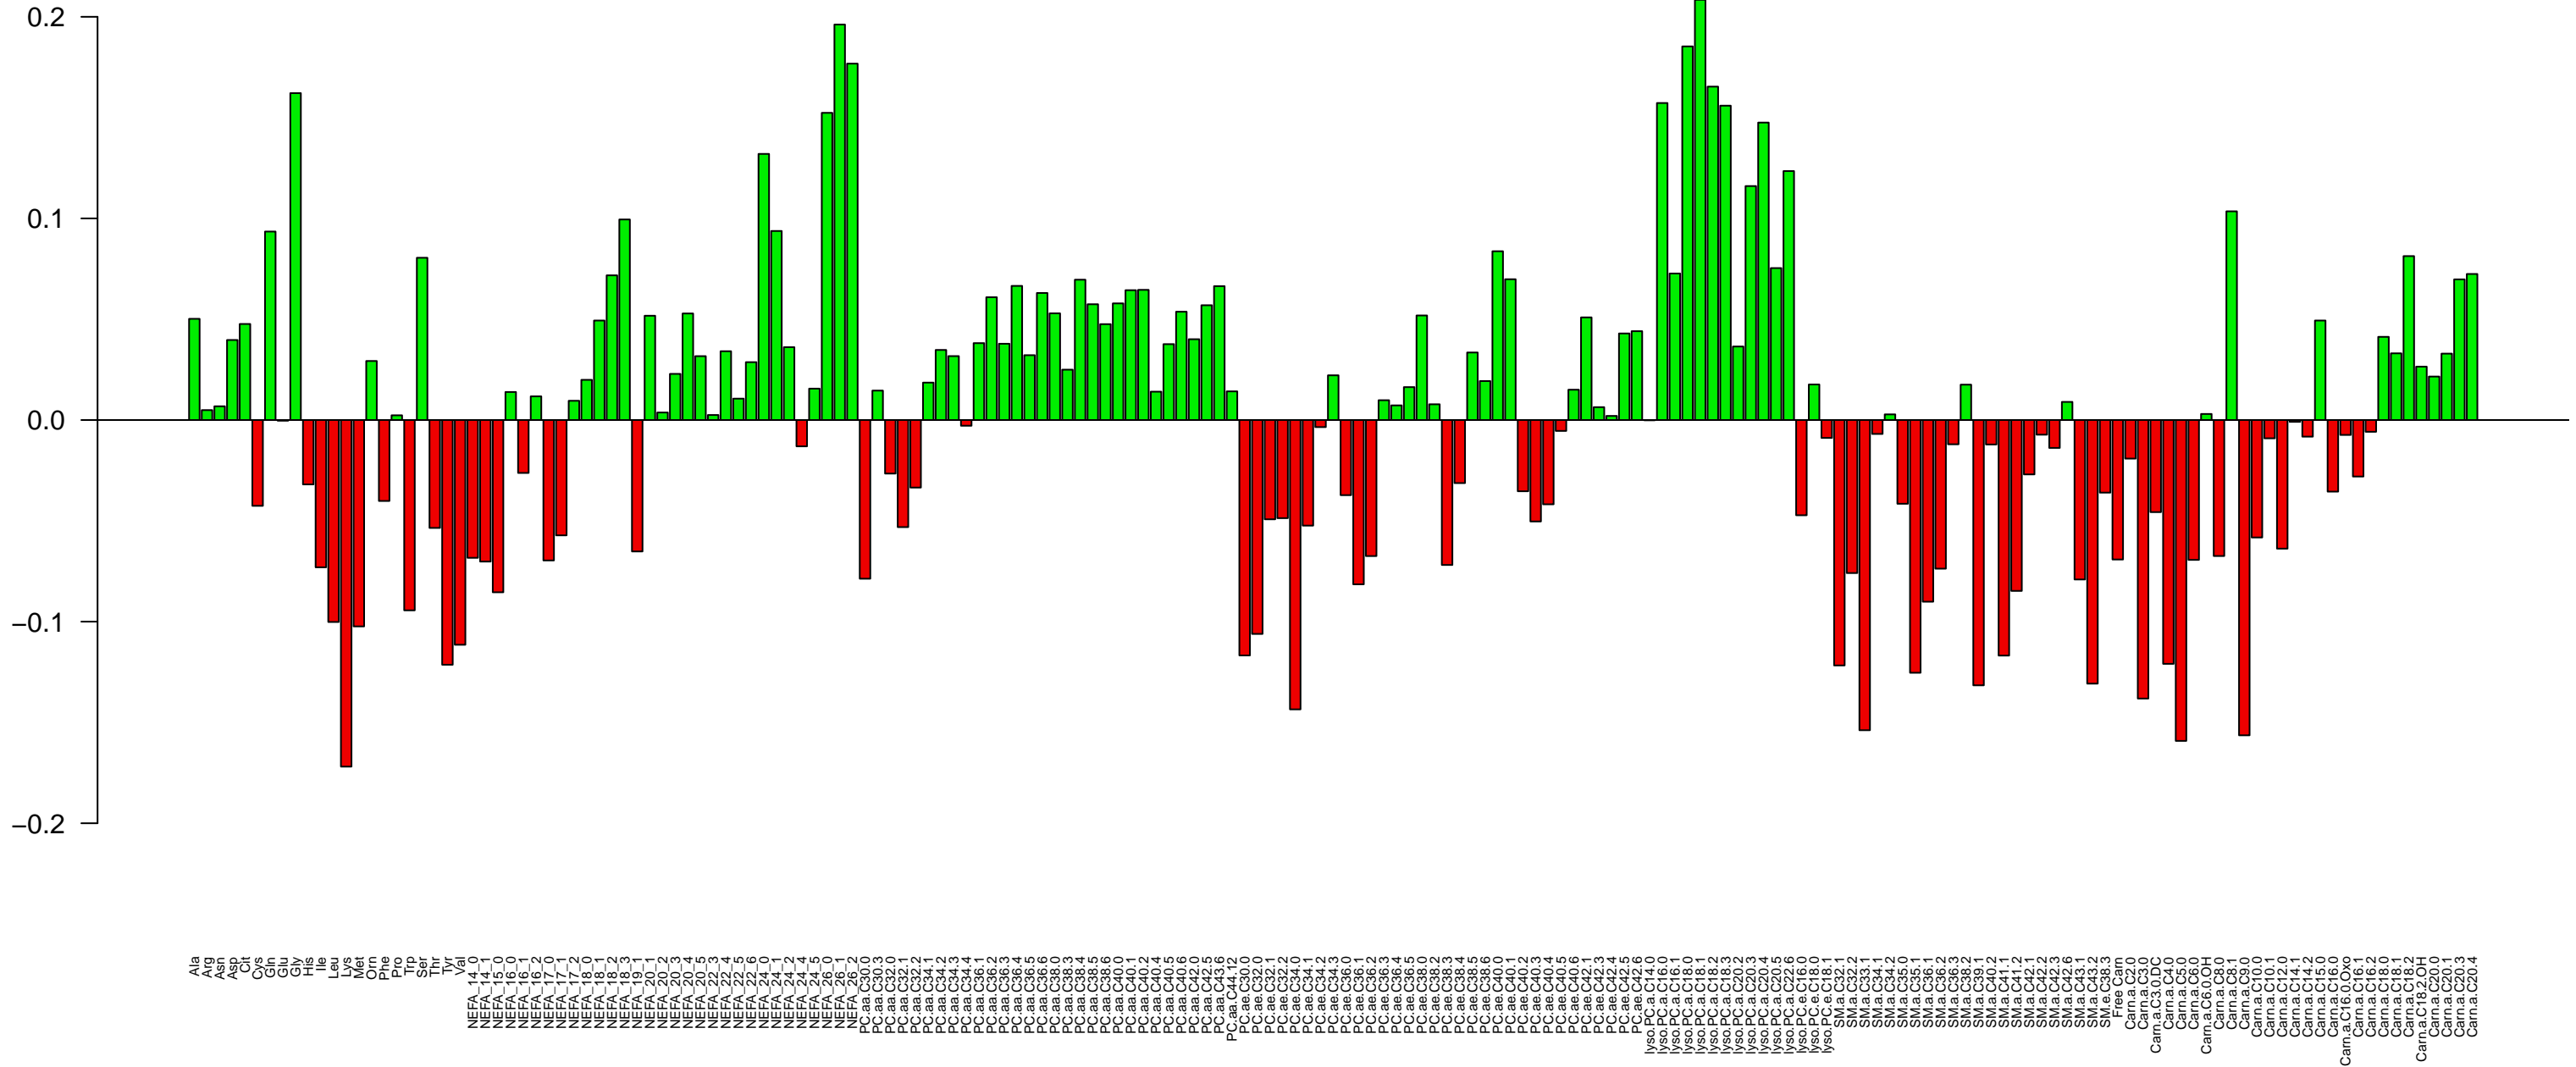

# Child age 10 – PC 7 Loadings

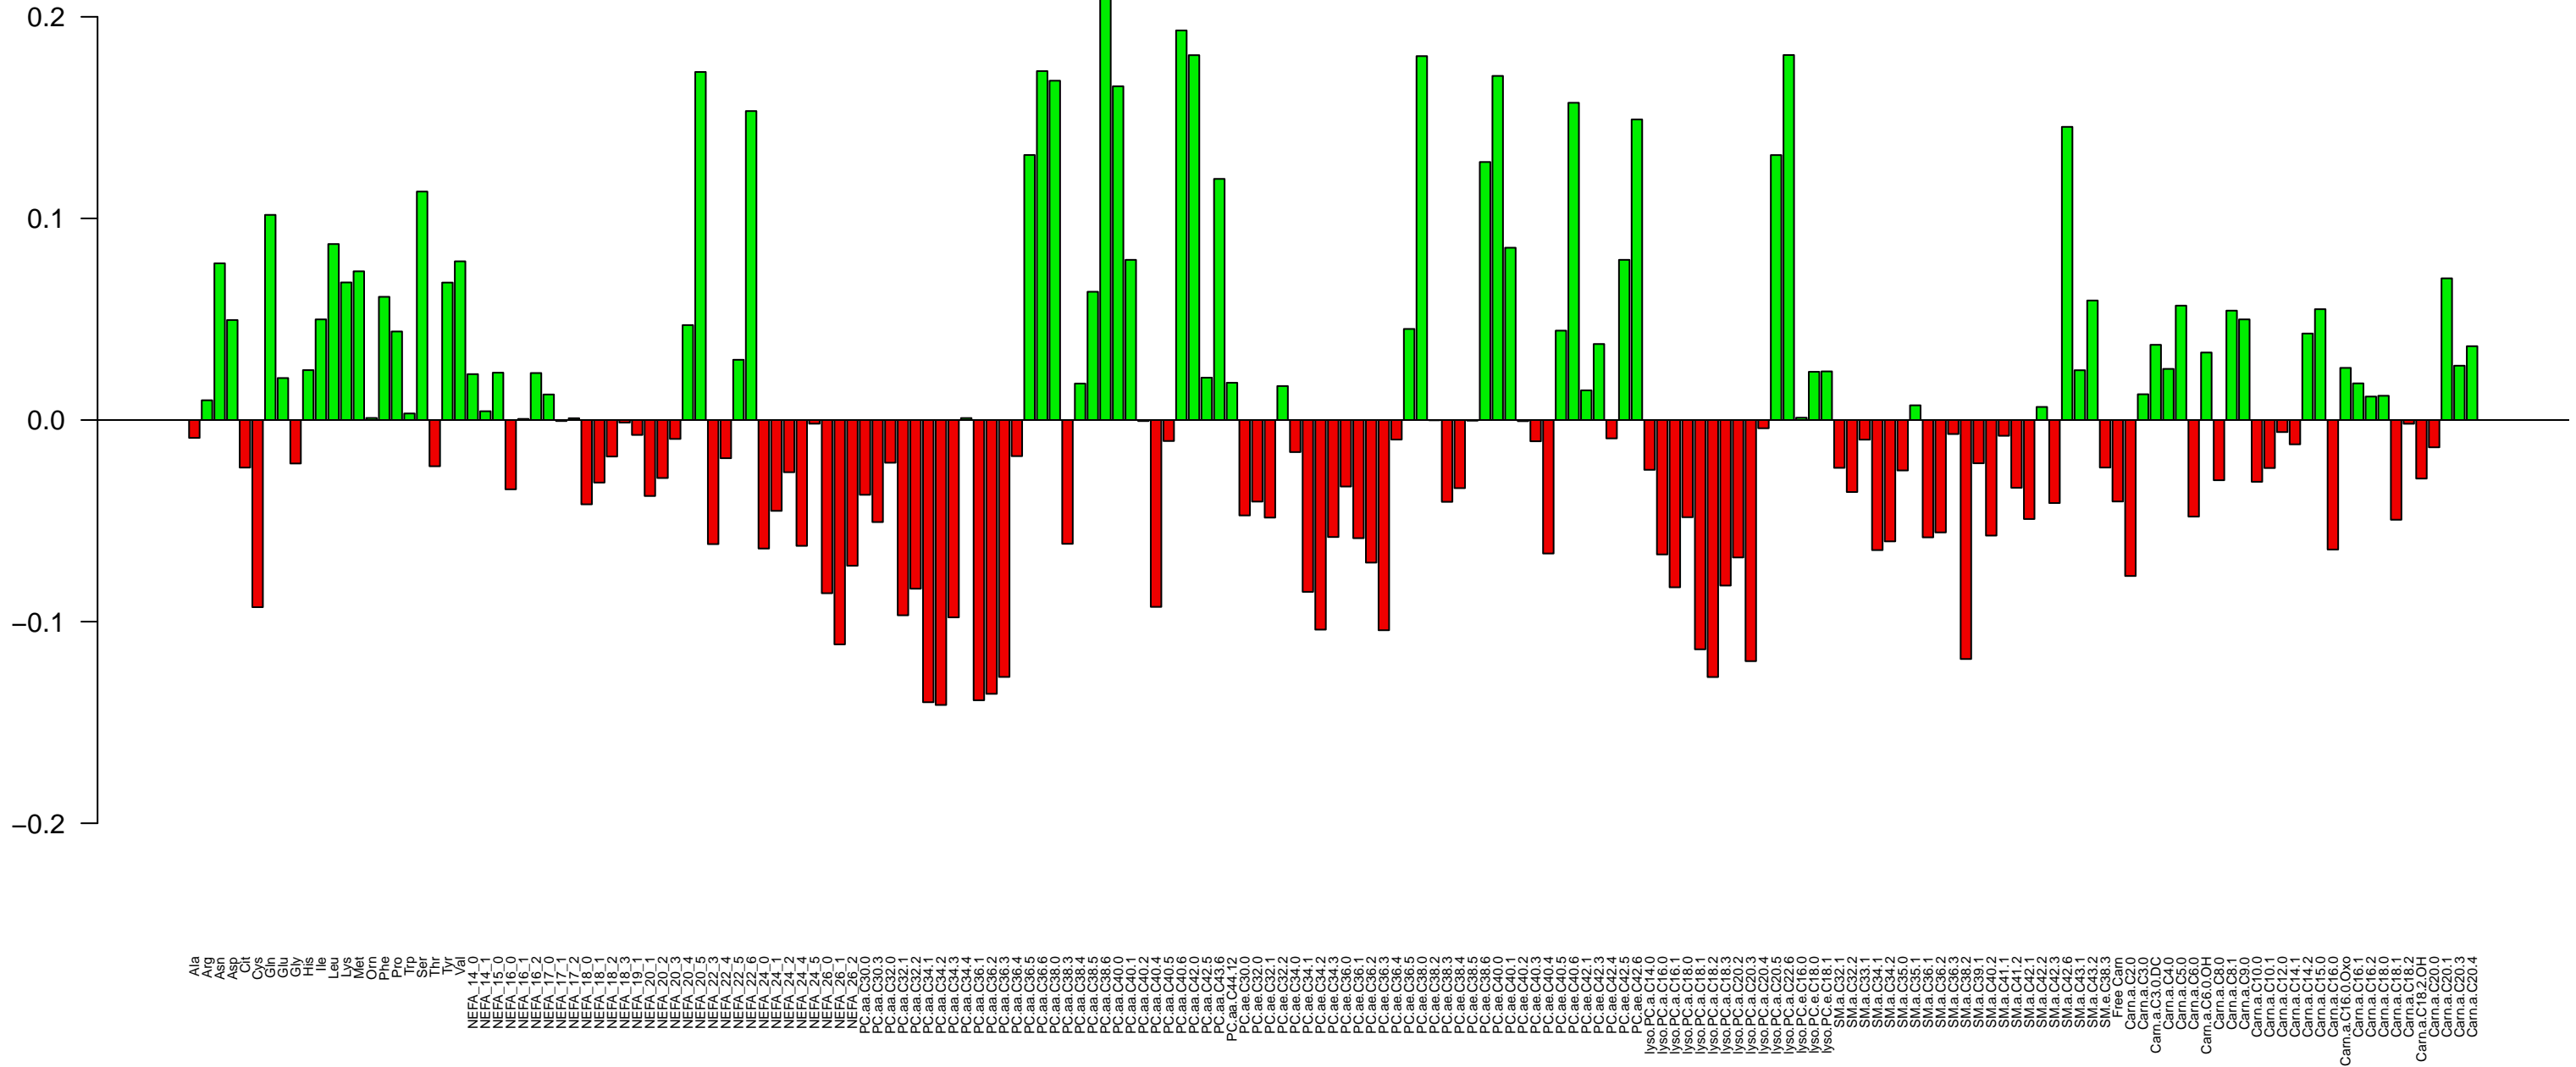

# Child age 10 - PC 8 Loadings

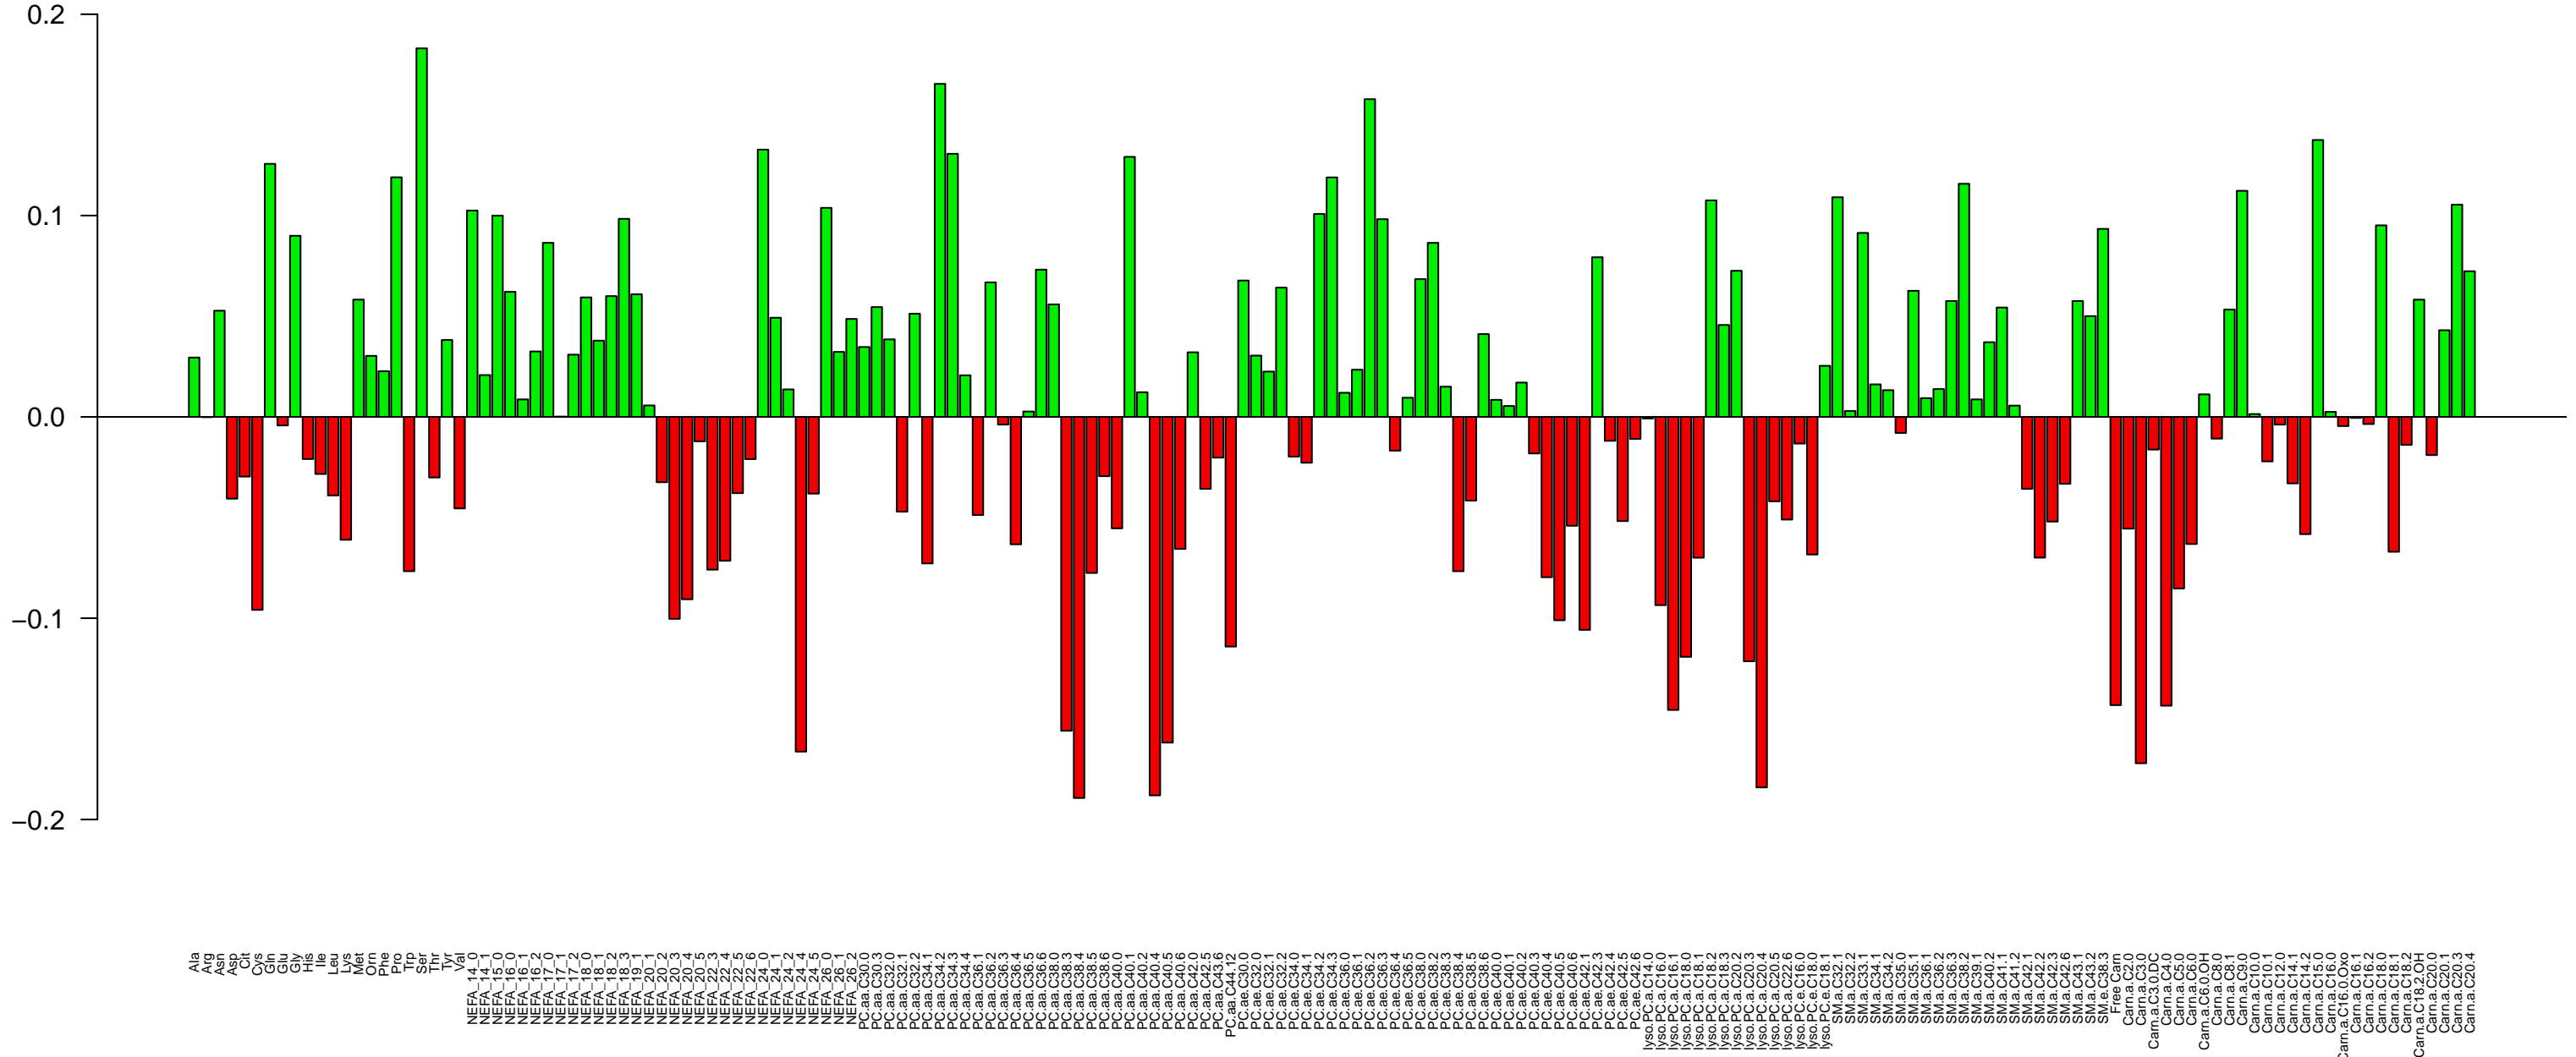



# Child age 10 – PC 9 Loadings

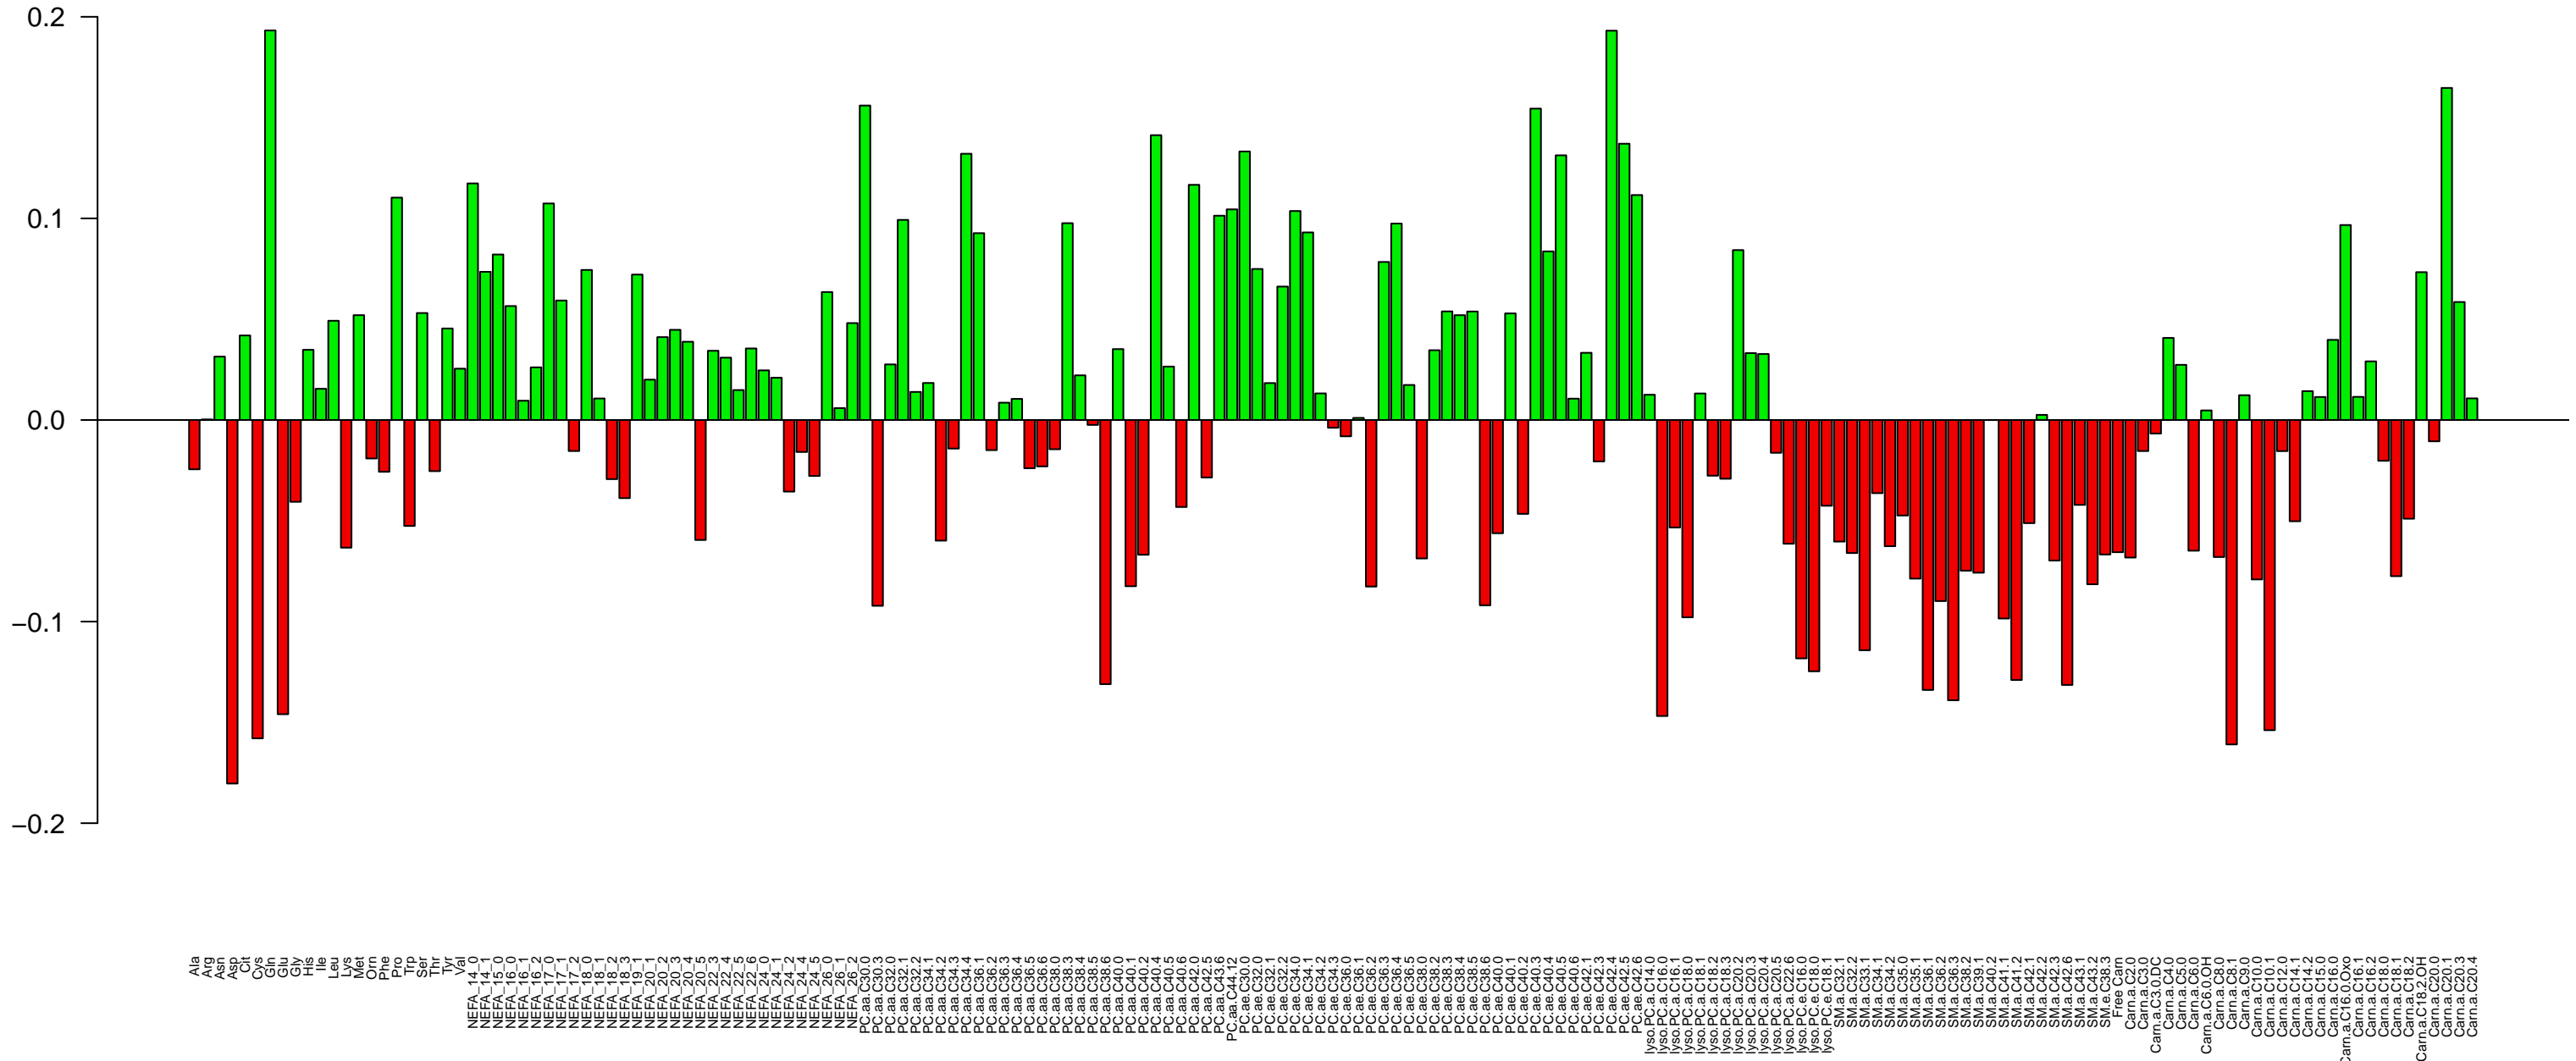

# Child age 10 – PC 10 Loadings

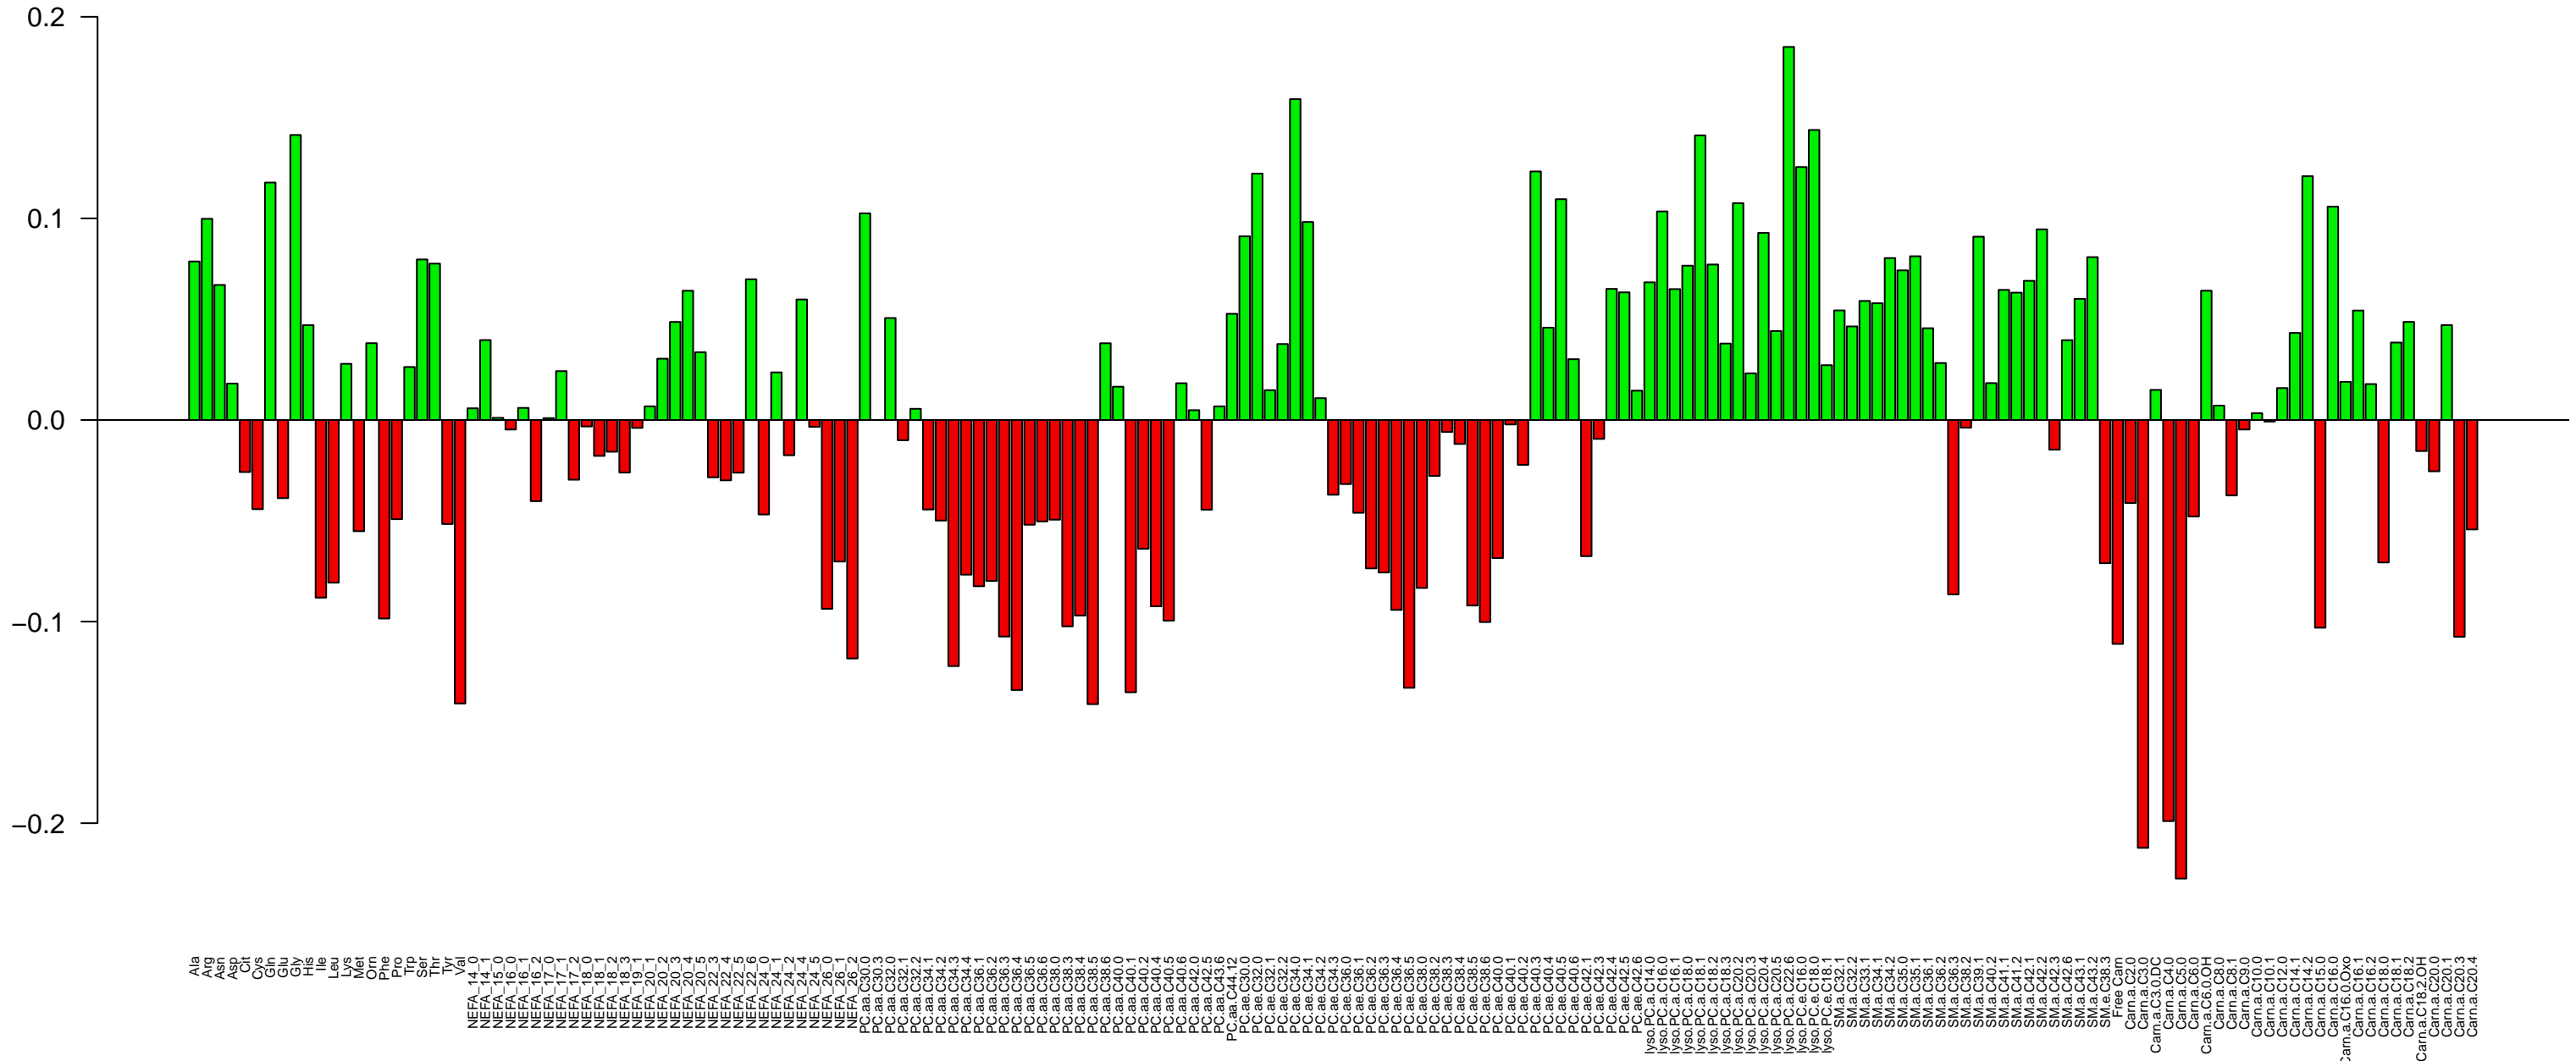

# Child age 10 – PC 11 Loadings

0.2  
0.1  
0.0  
-0.1  
-0.2

Ala  
Arg  
Asn  
Asp  
Cit  
Cis  
Cln  
Civ  
His  
Ile  
Leu  
Lys  
Met  
Orn  
Phe  
Pro  
Trr  
Thr  
Val  
NEFA\_14\_0  
NEFA\_14\_1  
NEFA\_15\_0  
NEFA\_16\_0  
NEFA\_16\_1  
NEFA\_16\_2  
NEFA\_17\_0  
NEFA\_17\_1  
NEFA\_17\_2  
NEFA\_18\_0  
NEFA\_18\_1  
NEFA\_18\_2  
NEFA\_18\_3  
NEFA\_19\_1  
NEFA\_20\_1  
NEFA\_20\_2  
NEFA\_20\_3  
NEFA\_20\_4  
NEFA\_20\_5  
NEFA\_22\_3  
NEFA\_22\_4  
NEFA\_22\_5  
NEFA\_22\_6  
NEFA\_24\_0  
NEFA\_24\_1  
NEFA\_24\_2  
NEFA\_24\_4  
NEFA\_24\_5  
NEFA\_26\_0  
NEFA\_26\_1  
NEFA\_26\_2  
PC\_aa\_C30\_0  
PC\_aa\_C30\_3  
PC\_aa\_C32\_0  
PC\_aa\_C32\_1  
PC\_aa\_C32\_2  
PC\_aa\_C34\_1  
PC\_aa\_C34\_2  
PC\_aa\_C34\_3  
PC\_aa\_C34\_4  
PC\_aa\_C36\_1  
PC\_aa\_C36\_2  
PC\_aa\_C36\_3  
PC\_aa\_C36\_4  
PC\_aa\_C38\_0  
PC\_aa\_C38\_1  
PC\_aa\_C38\_2  
PC\_aa\_C38\_3  
PC\_aa\_C38\_4  
PC\_aa\_C38\_5  
PC\_aa\_C38\_6  
PC\_aa\_C40\_0  
PC\_aa\_C40\_1  
PC\_aa\_C40\_2  
PC\_aa\_C40\_4  
PC\_aa\_C40\_5  
PC\_aa\_C40\_6  
PC\_aa\_C42\_0  
PC\_aa\_C42\_5  
PC\_aa\_C42\_9  
PC\_aa\_C44\_0  
PC\_aa\_C30\_0  
PC\_aa\_C32\_0  
PC\_aa\_C32\_1  
PC\_aa\_C32\_2  
PC\_aa\_C34\_0  
PC\_aa\_C34\_1  
PC\_aa\_C34\_2  
PC\_aa\_C34\_3  
PC\_aa\_C36\_0  
PC\_aa\_C36\_1  
PC\_aa\_C36\_2  
PC\_aa\_C36\_3  
PC\_aa\_C36\_4  
PC\_aa\_C38\_0  
PC\_aa\_C38\_2  
PC\_aa\_C38\_3  
PC\_aa\_C38\_4  
PC\_aa\_C38\_5  
PC\_aa\_C38\_6  
PC\_aa\_C40\_0  
PC\_aa\_C40\_1  
PC\_aa\_C40\_2  
PC\_aa\_C40\_3  
PC\_aa\_C40\_4  
PC\_aa\_C40\_5  
PC\_aa\_C40\_6  
PC\_aa\_C42\_1  
PC\_aa\_C42\_3  
PC\_aa\_C42\_5  
PC\_aa\_C42\_9  
Iyso\_PC\_a\_C14\_0  
Iyso\_PC\_a\_C16\_0  
Iyso\_PC\_a\_C16\_1  
Iyso\_PC\_a\_C18\_0  
Iyso\_PC\_a\_C18\_1  
Iyso\_PC\_a\_C18\_2  
Iyso\_PC\_a\_C18\_3  
Iyso\_PC\_a\_C20\_2  
Iyso\_PC\_a\_C20\_3  
Iyso\_PC\_a\_C20\_4  
Iyso\_PC\_a\_C20\_5  
Iyso\_PC\_e\_C12\_0  
Iyso\_PC\_e\_C18\_0  
Iyso\_PC\_e\_C18\_1  
SM\_a\_C32\_1  
SM\_a\_C32\_2  
SM\_a\_C33\_1  
SM\_a\_C34\_1  
SM\_a\_C34\_2  
SM\_a\_C35\_0  
SM\_a\_C35\_1  
SM\_a\_C36\_1  
SM\_a\_C36\_2  
SM\_a\_C36\_3  
SM\_a\_C38\_2  
SM\_a\_C40\_1  
SM\_a\_C41\_1  
SM\_a\_C41\_2  
SM\_a\_C42\_1  
SM\_a\_C42\_2  
SM\_a\_C42\_3  
SM\_a\_C42\_6  
SM\_a\_C43\_1  
SM\_a\_C43\_2  
SM\_e\_C38\_3  
Free Carn  
Carn.a\_C2\_0  
Carn.a\_C3\_0  
Carn.a\_C3\_0\_DC  
Carn.a\_C4\_0  
Carn.a\_C6\_0  
Carn.a\_C6\_0\_OH  
Carn.a\_C8\_0  
Carn.a\_C8\_1  
Carn.a\_C9\_0  
Carn.a\_C10\_0  
Carn.a\_C10\_1  
Carn.a\_C12\_0  
Carn.a\_C14\_1  
Carn.a\_C14\_2  
Carn.a\_C15\_0  
Carn.a\_C16\_0  
Carn.a\_C16\_0\_Ox  
Carn.a\_C16\_1  
Carn.a\_C18\_1  
Carn.a\_C18\_2  
Carn.a\_C18\_2\_OH  
Carn.a\_C20\_0  
Carn.a\_C20\_1  
Carn.a\_C20\_3  
Carn.a\_C20\_4

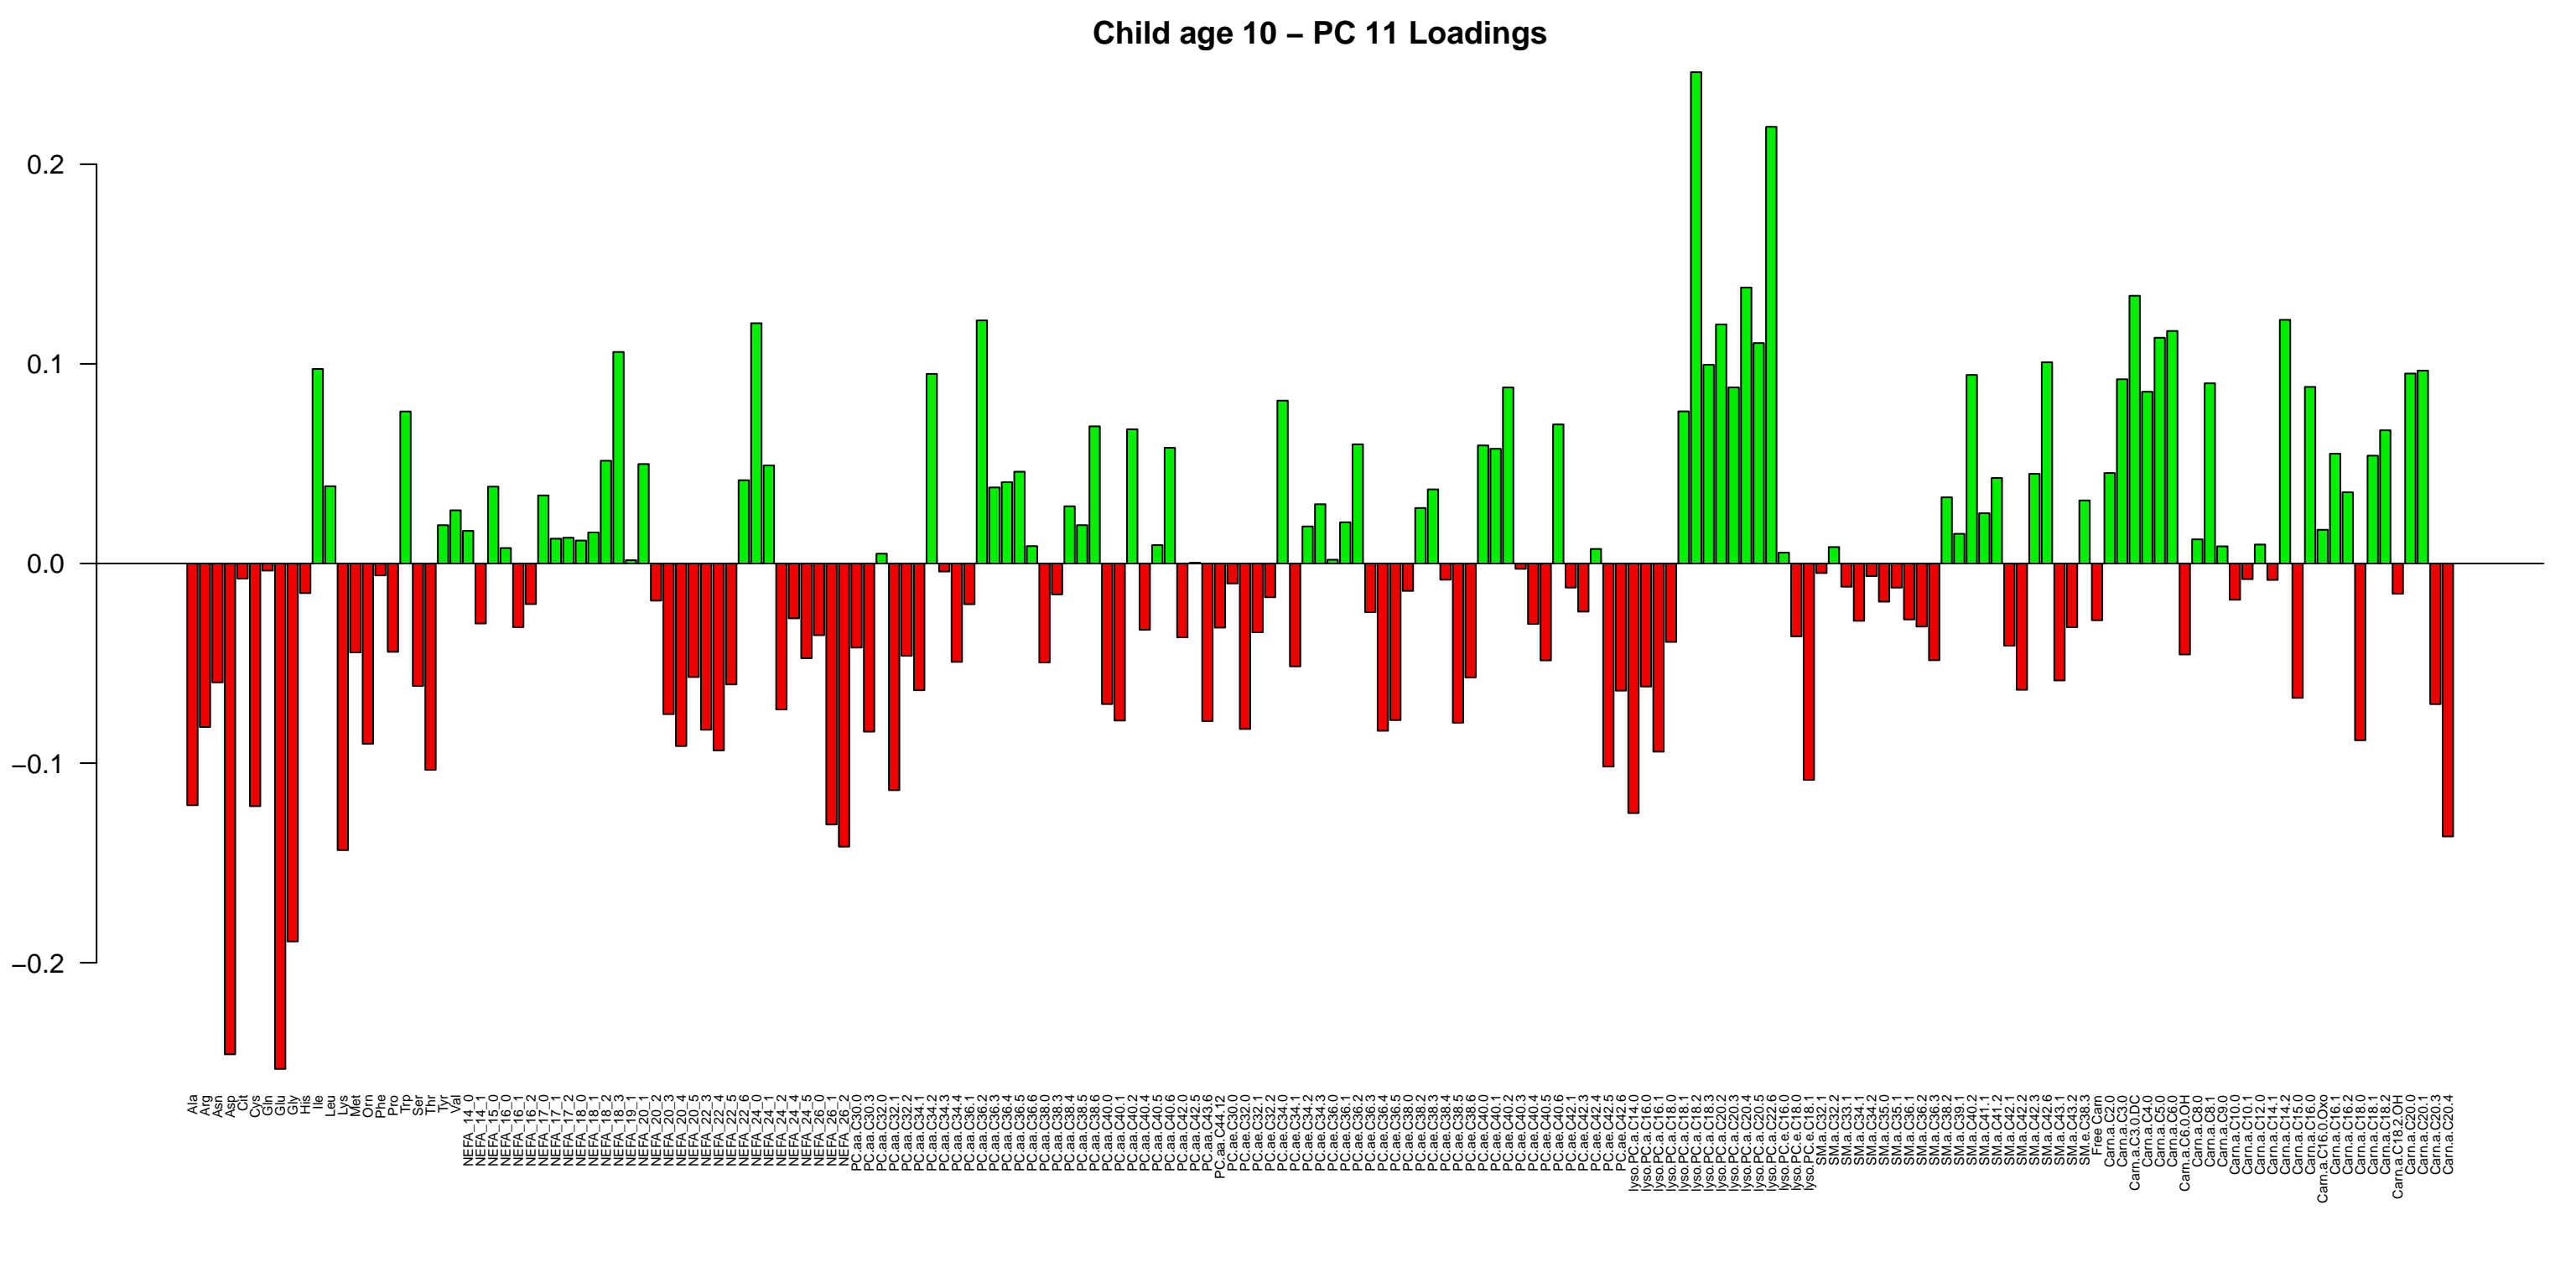

# Child age 10 – PC 12 Loadings

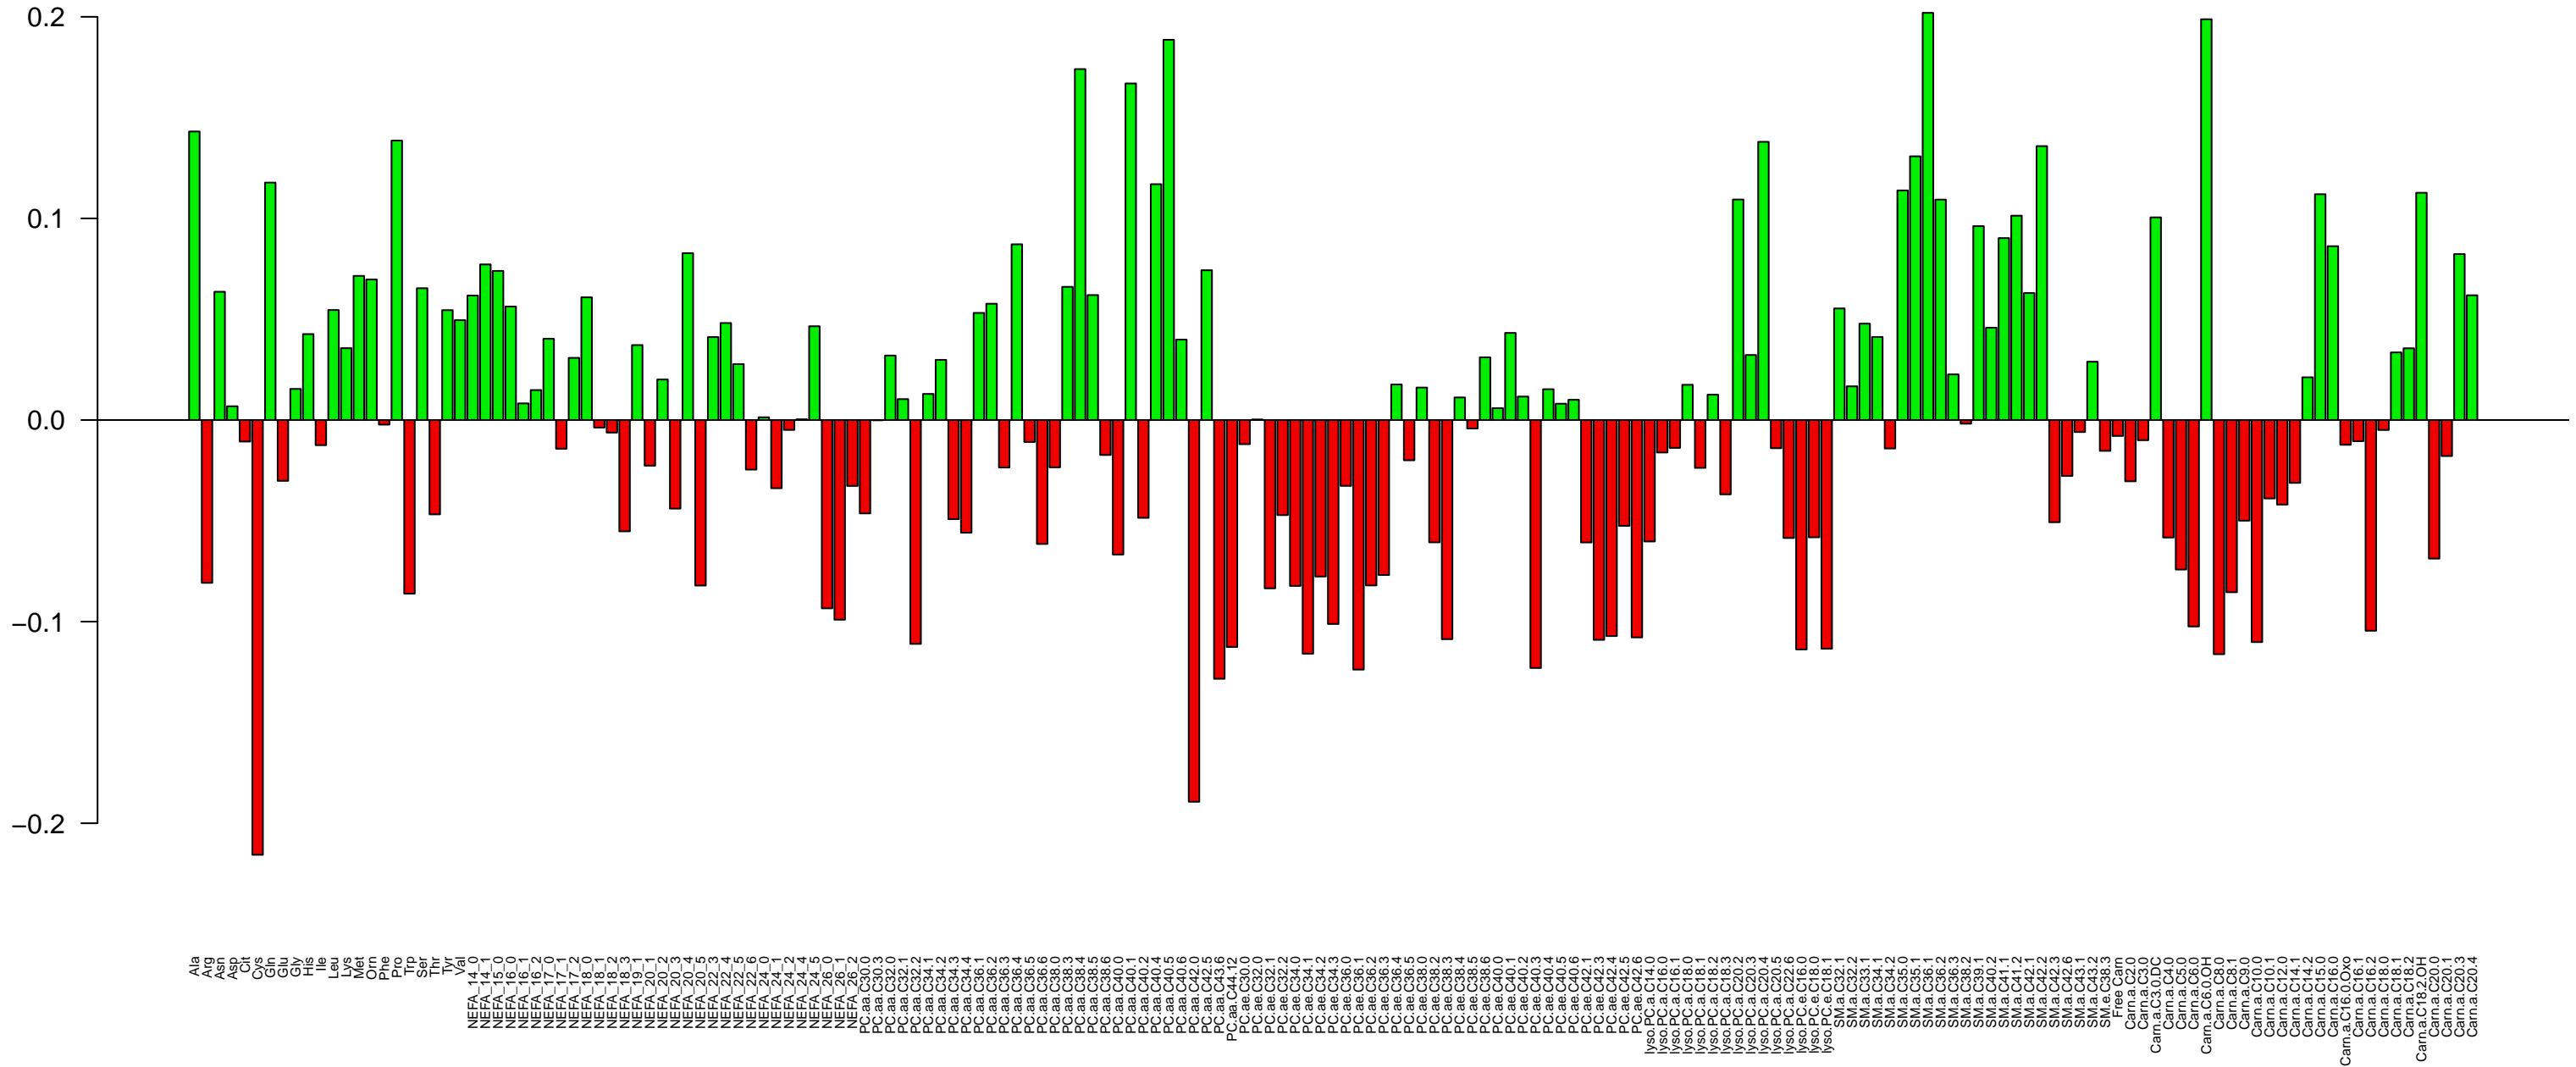

### Child age 10 - PC 13 Loadings

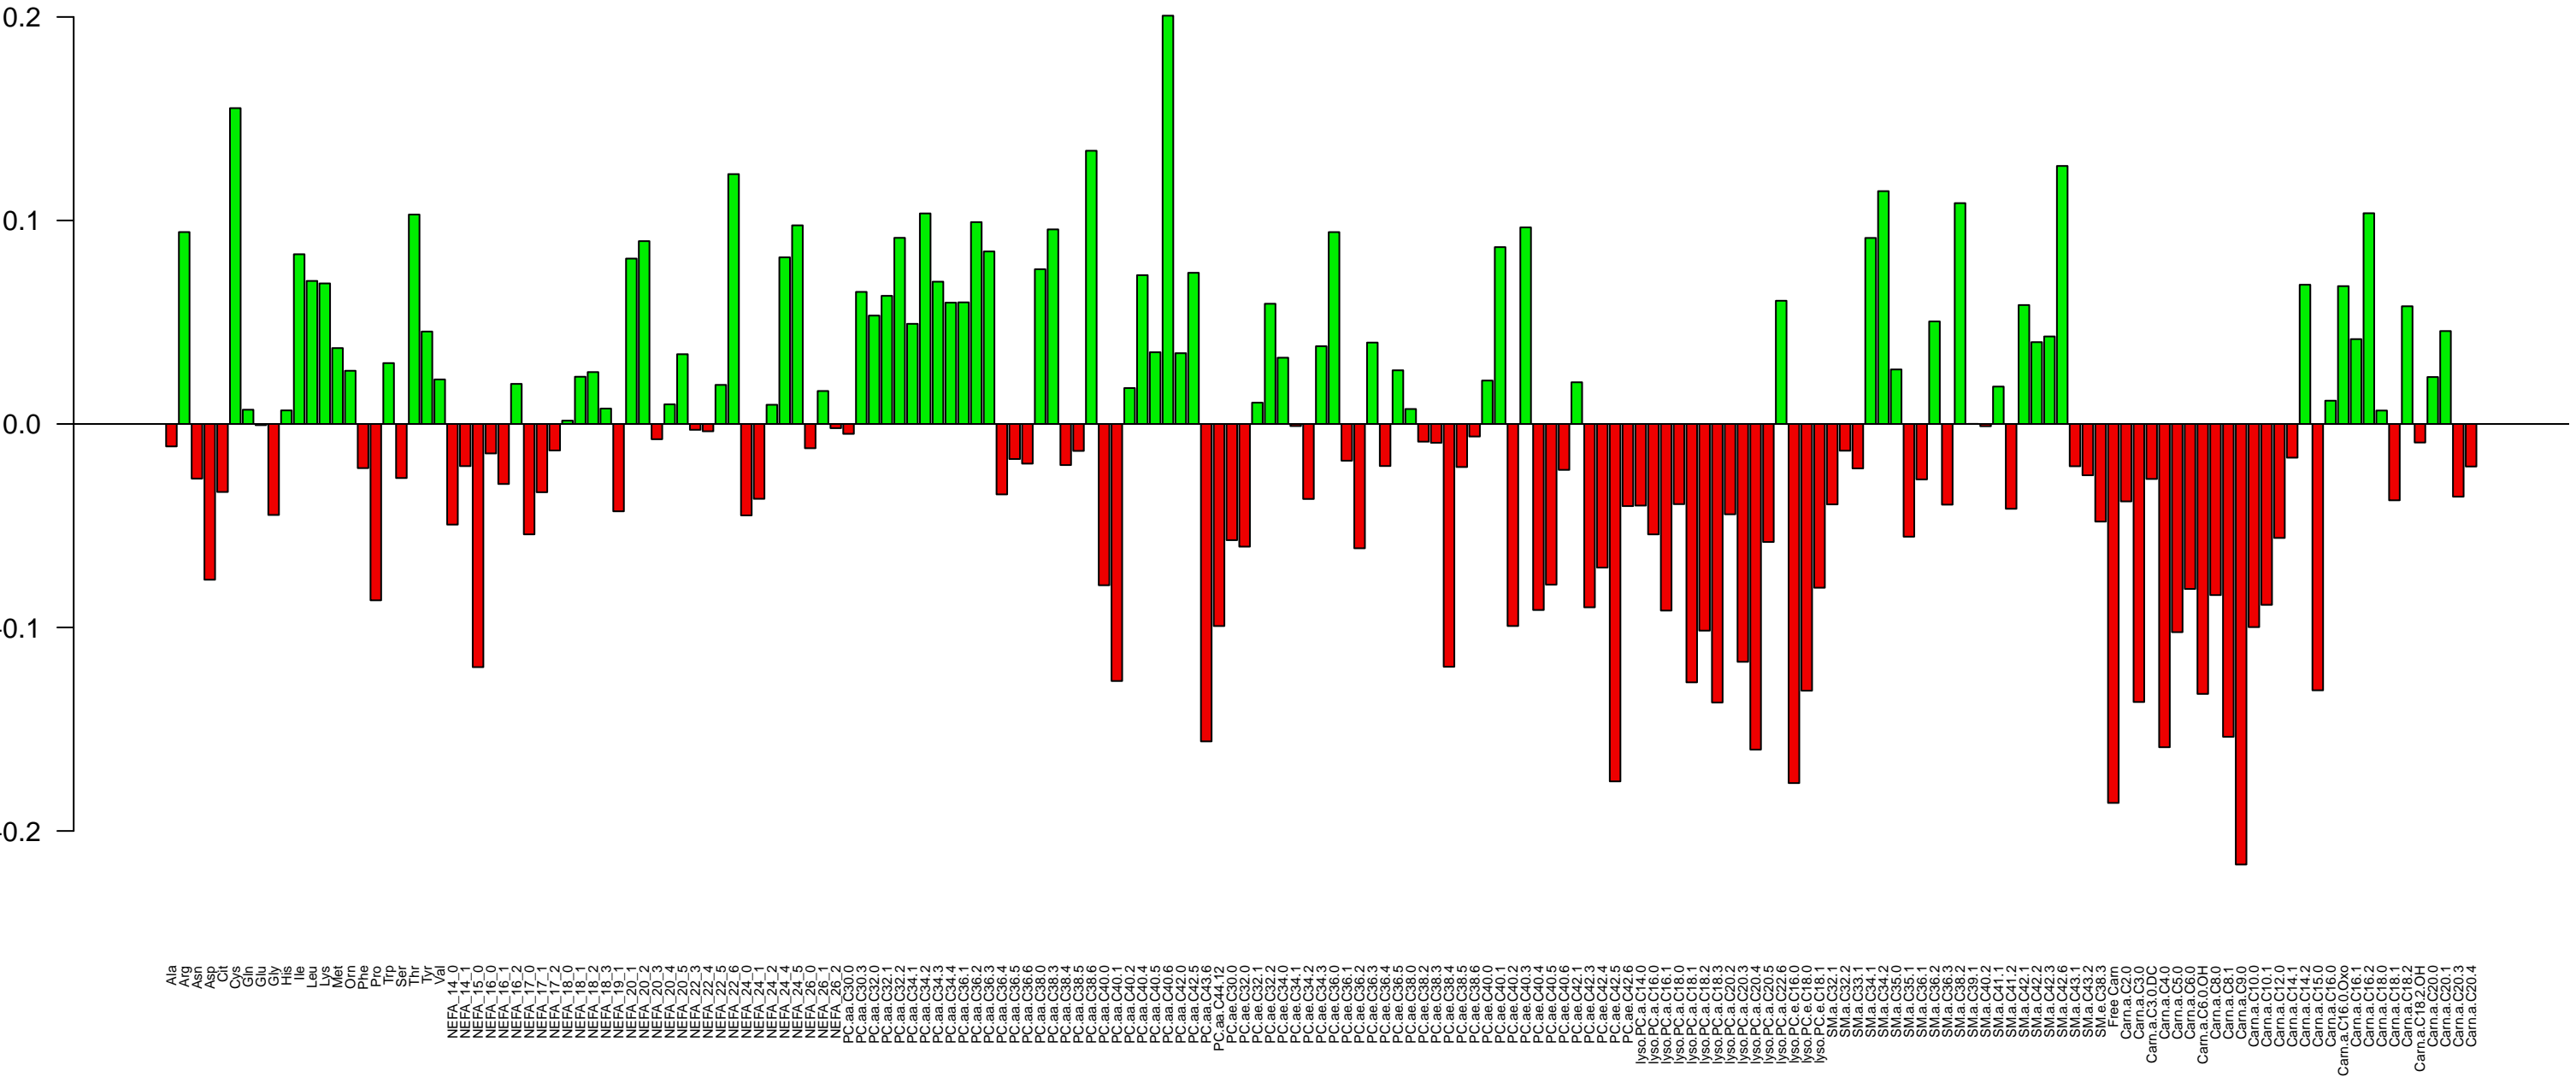

# Child age 10 – PC 14 Loadings

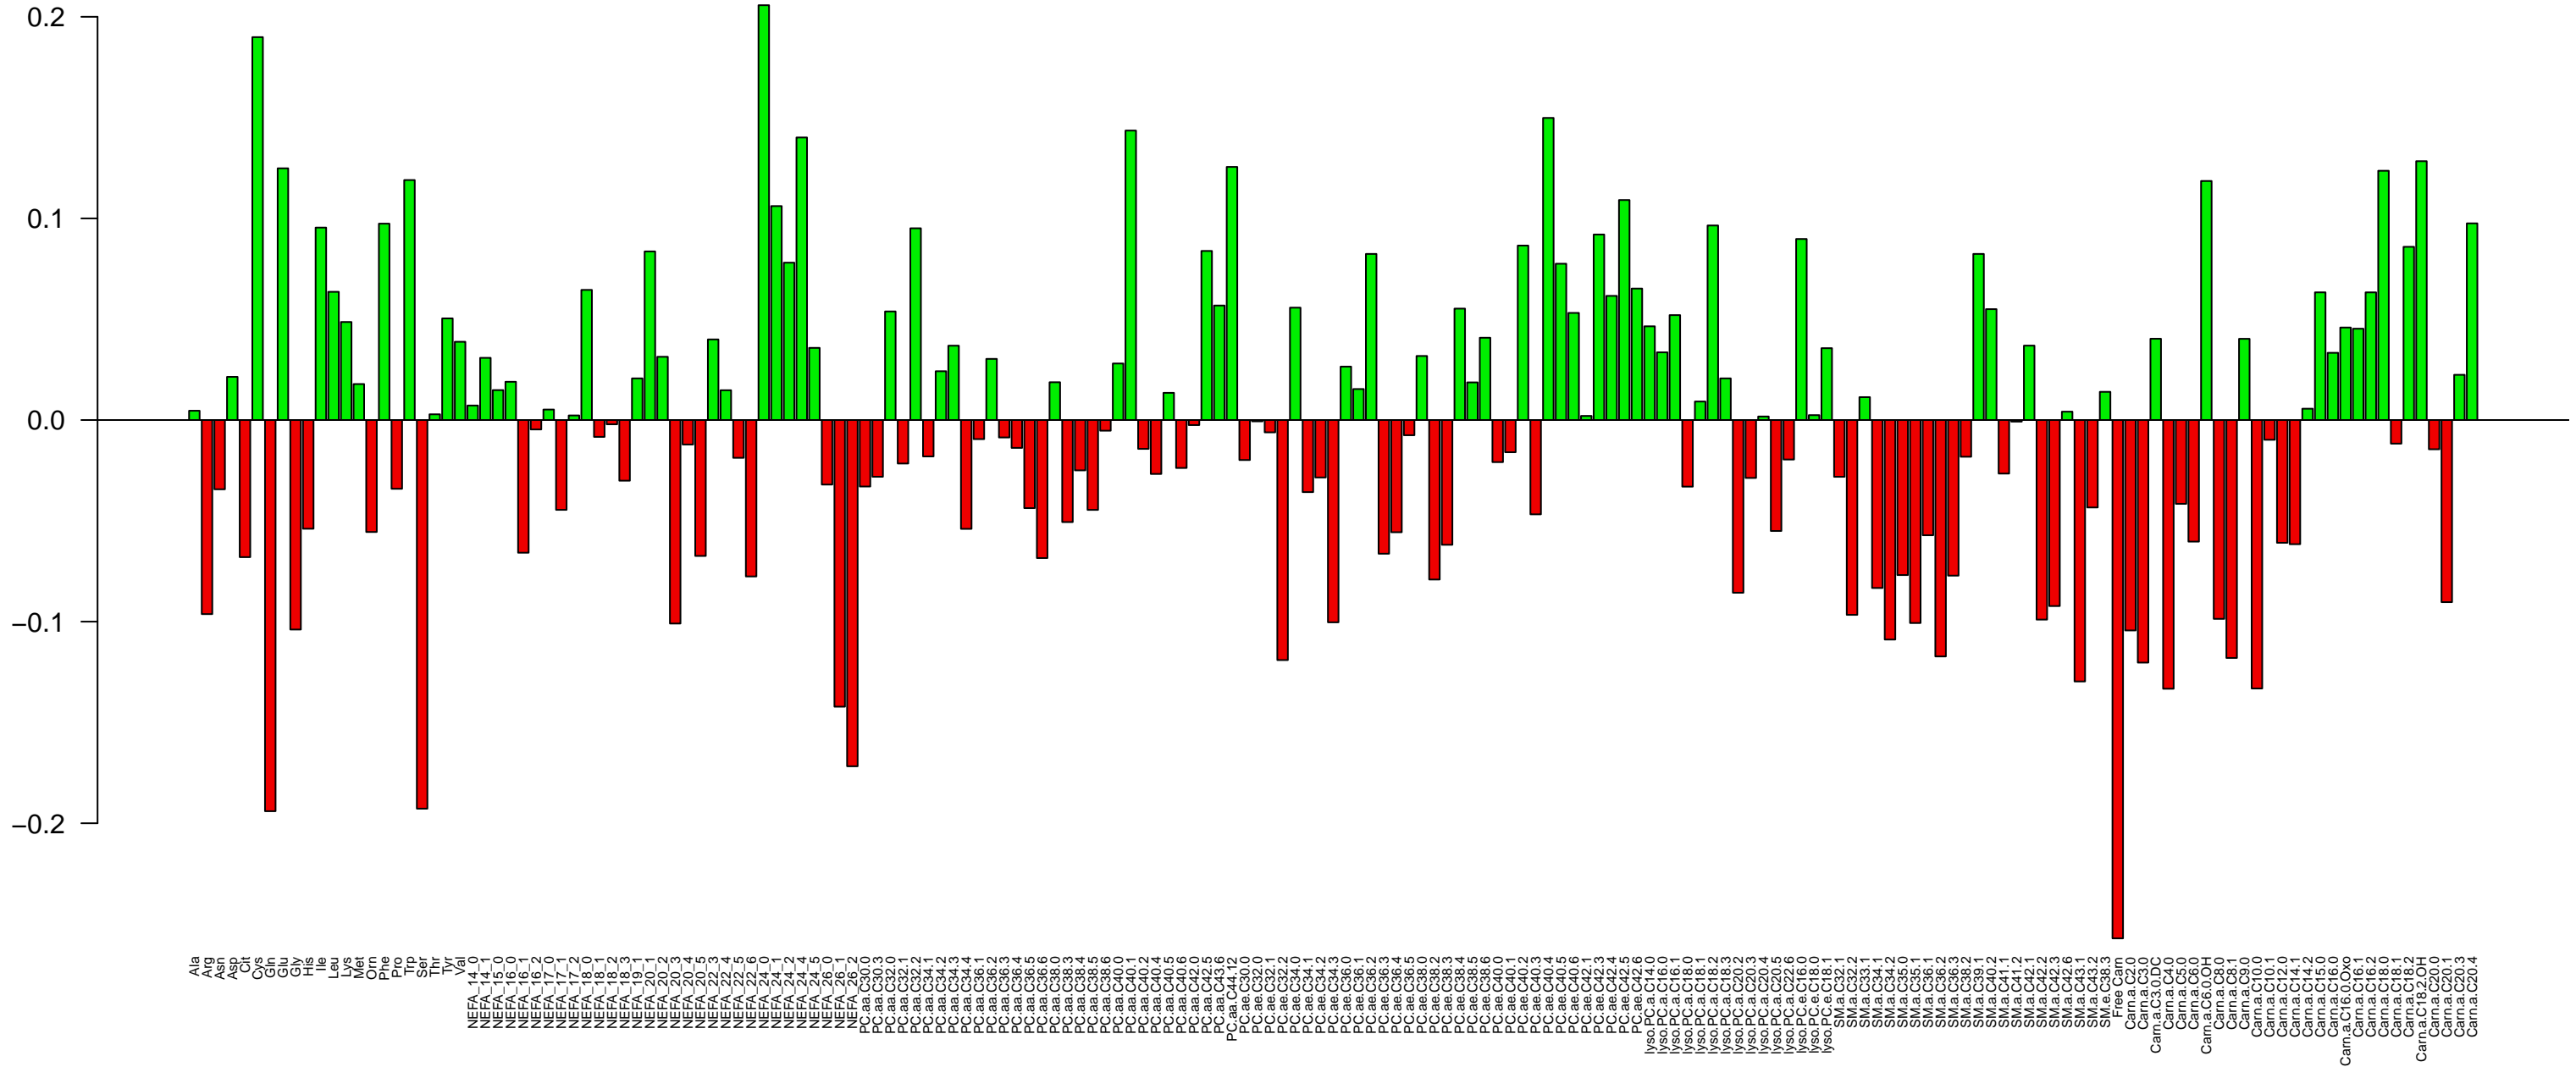

# Child age 10 – PC 15 Loadings

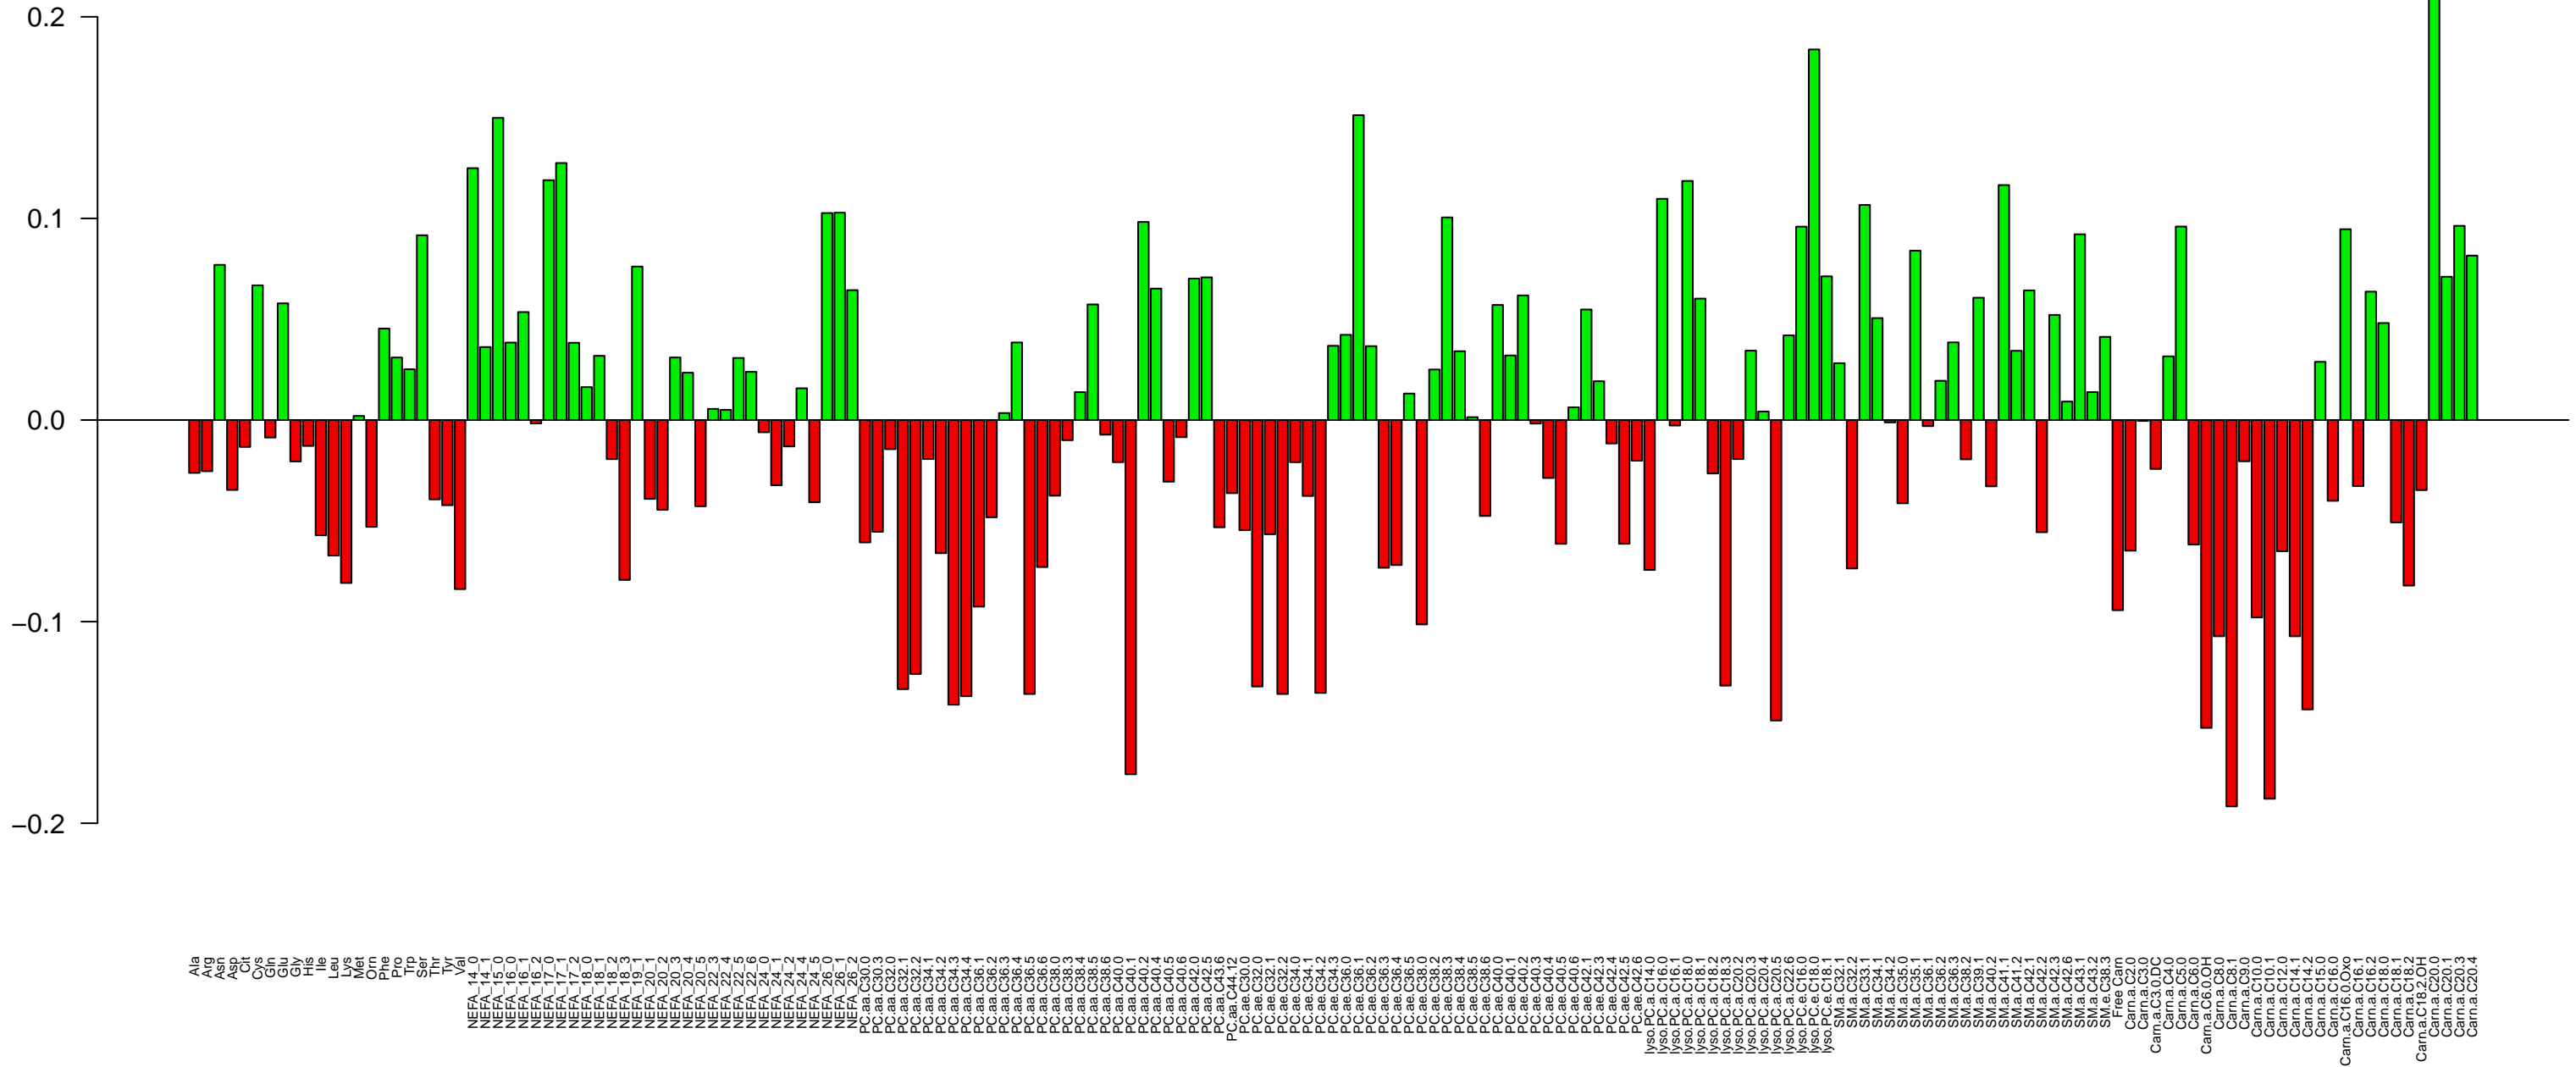

# Child age 10 – PC 16 Loadings

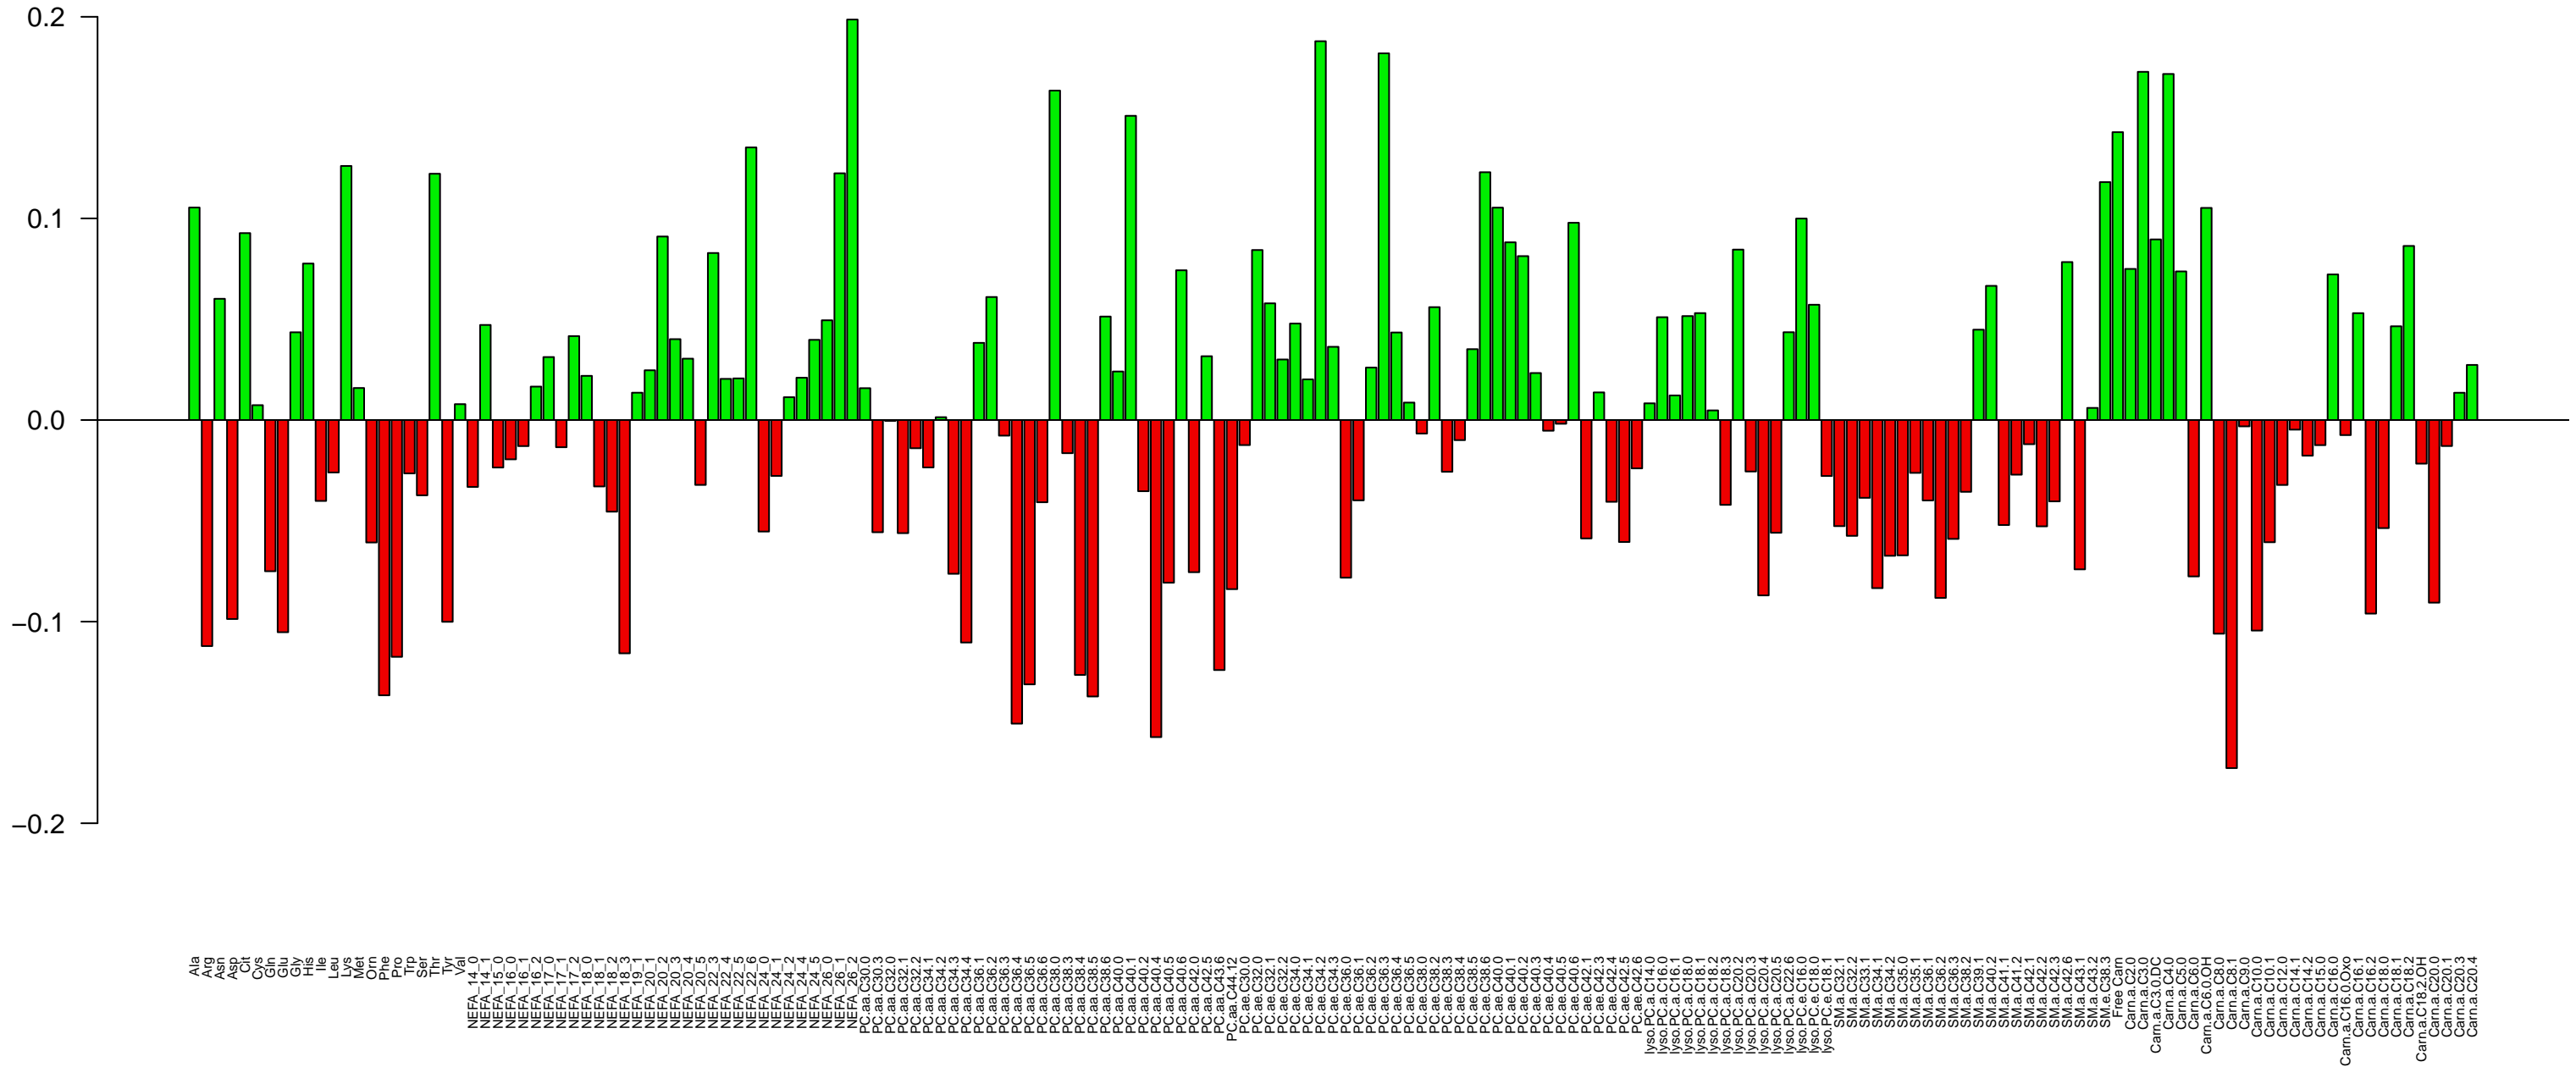



# Child age 10 – PC 17 Loadings

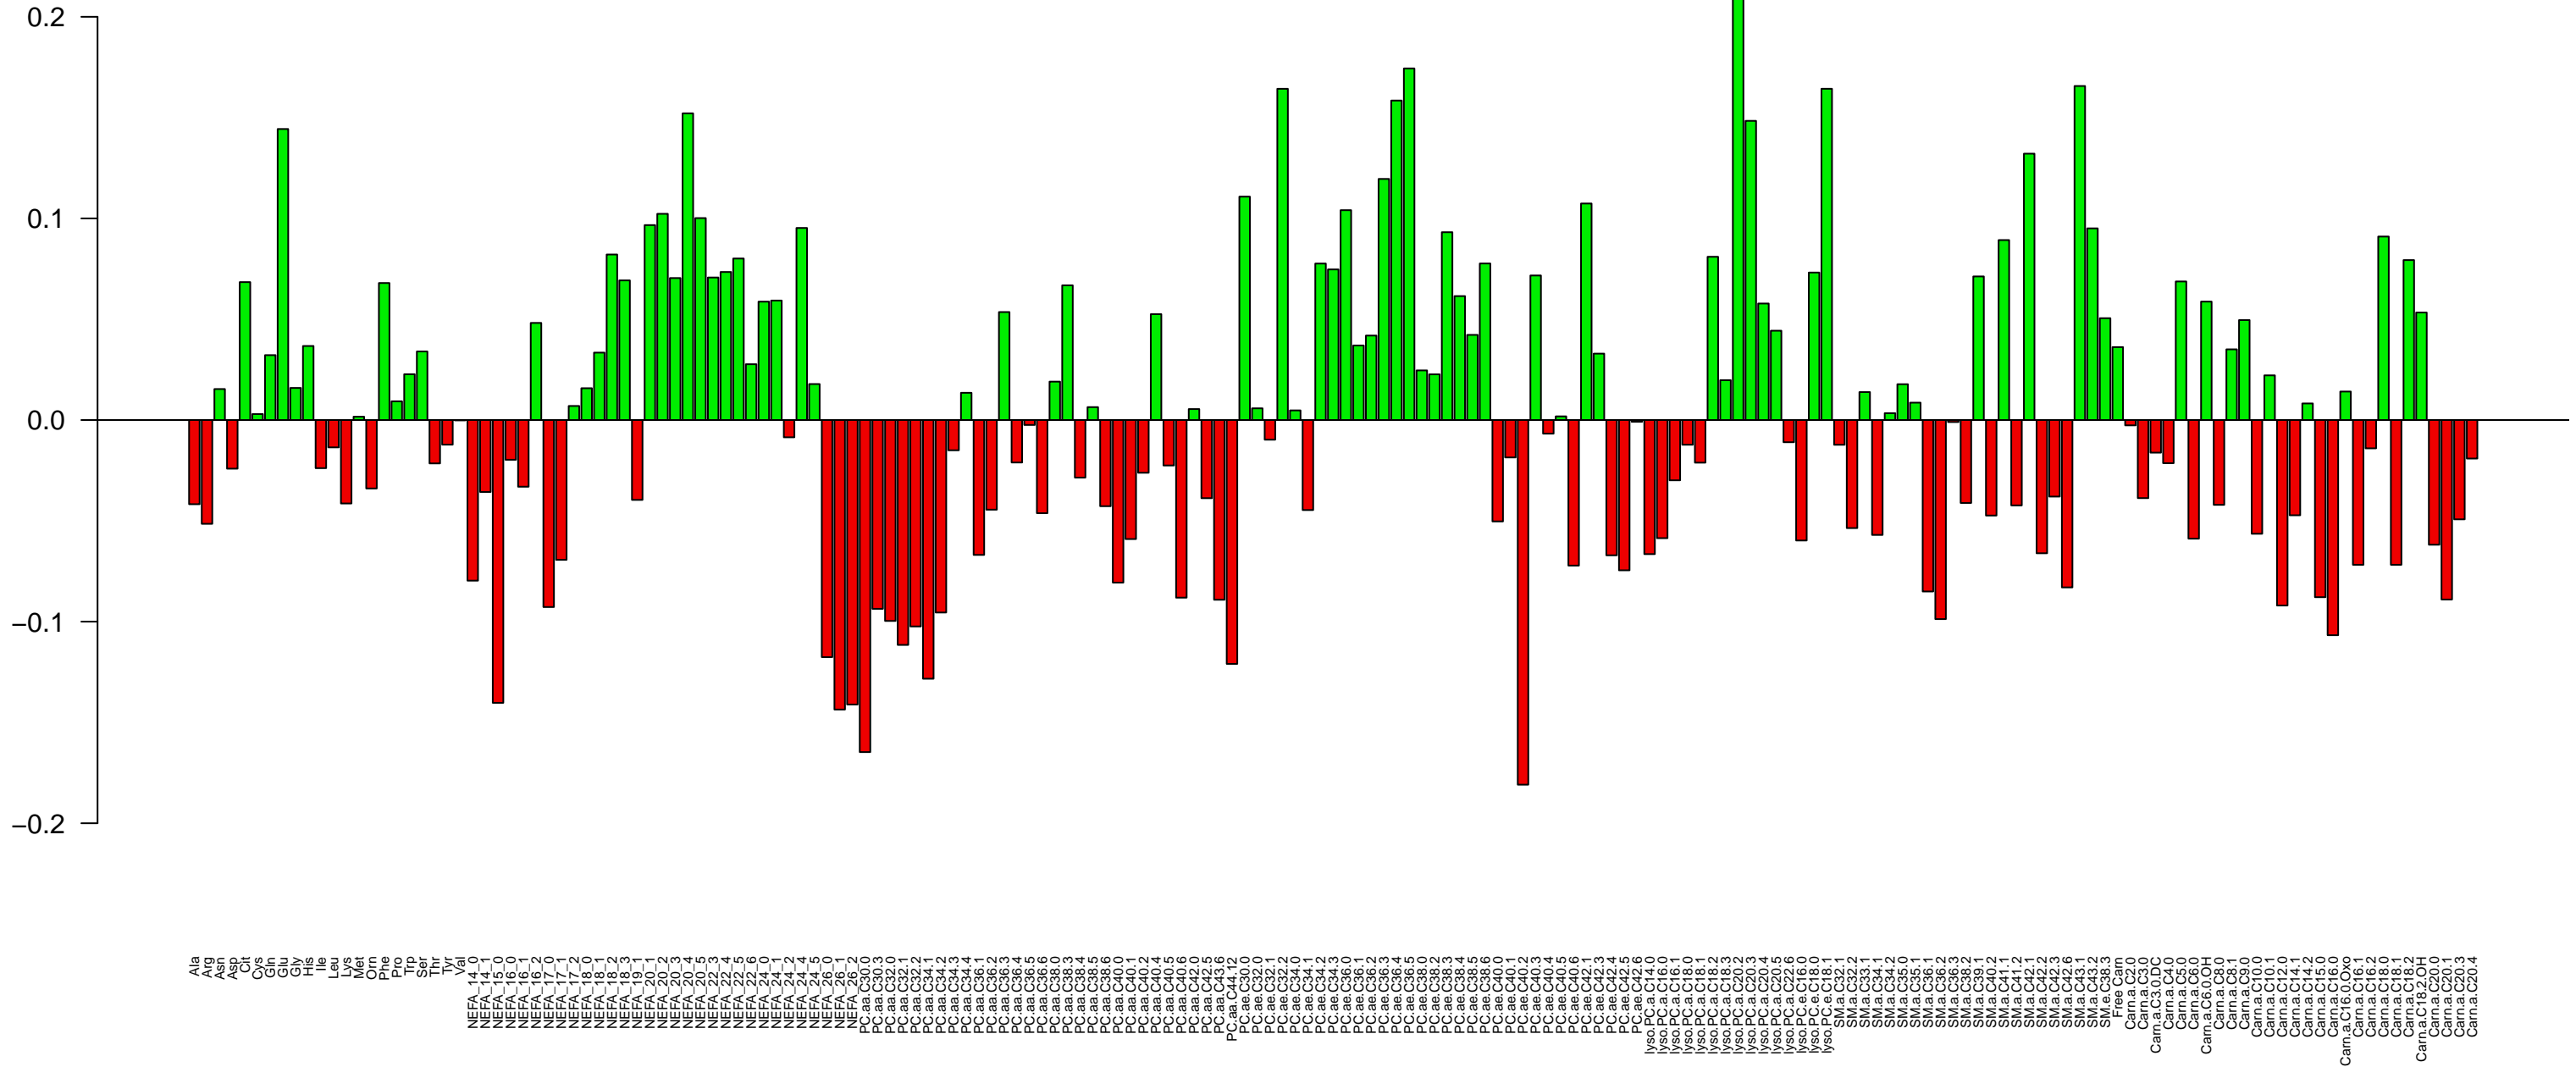

# Child age 10 – PC 18 Loadings

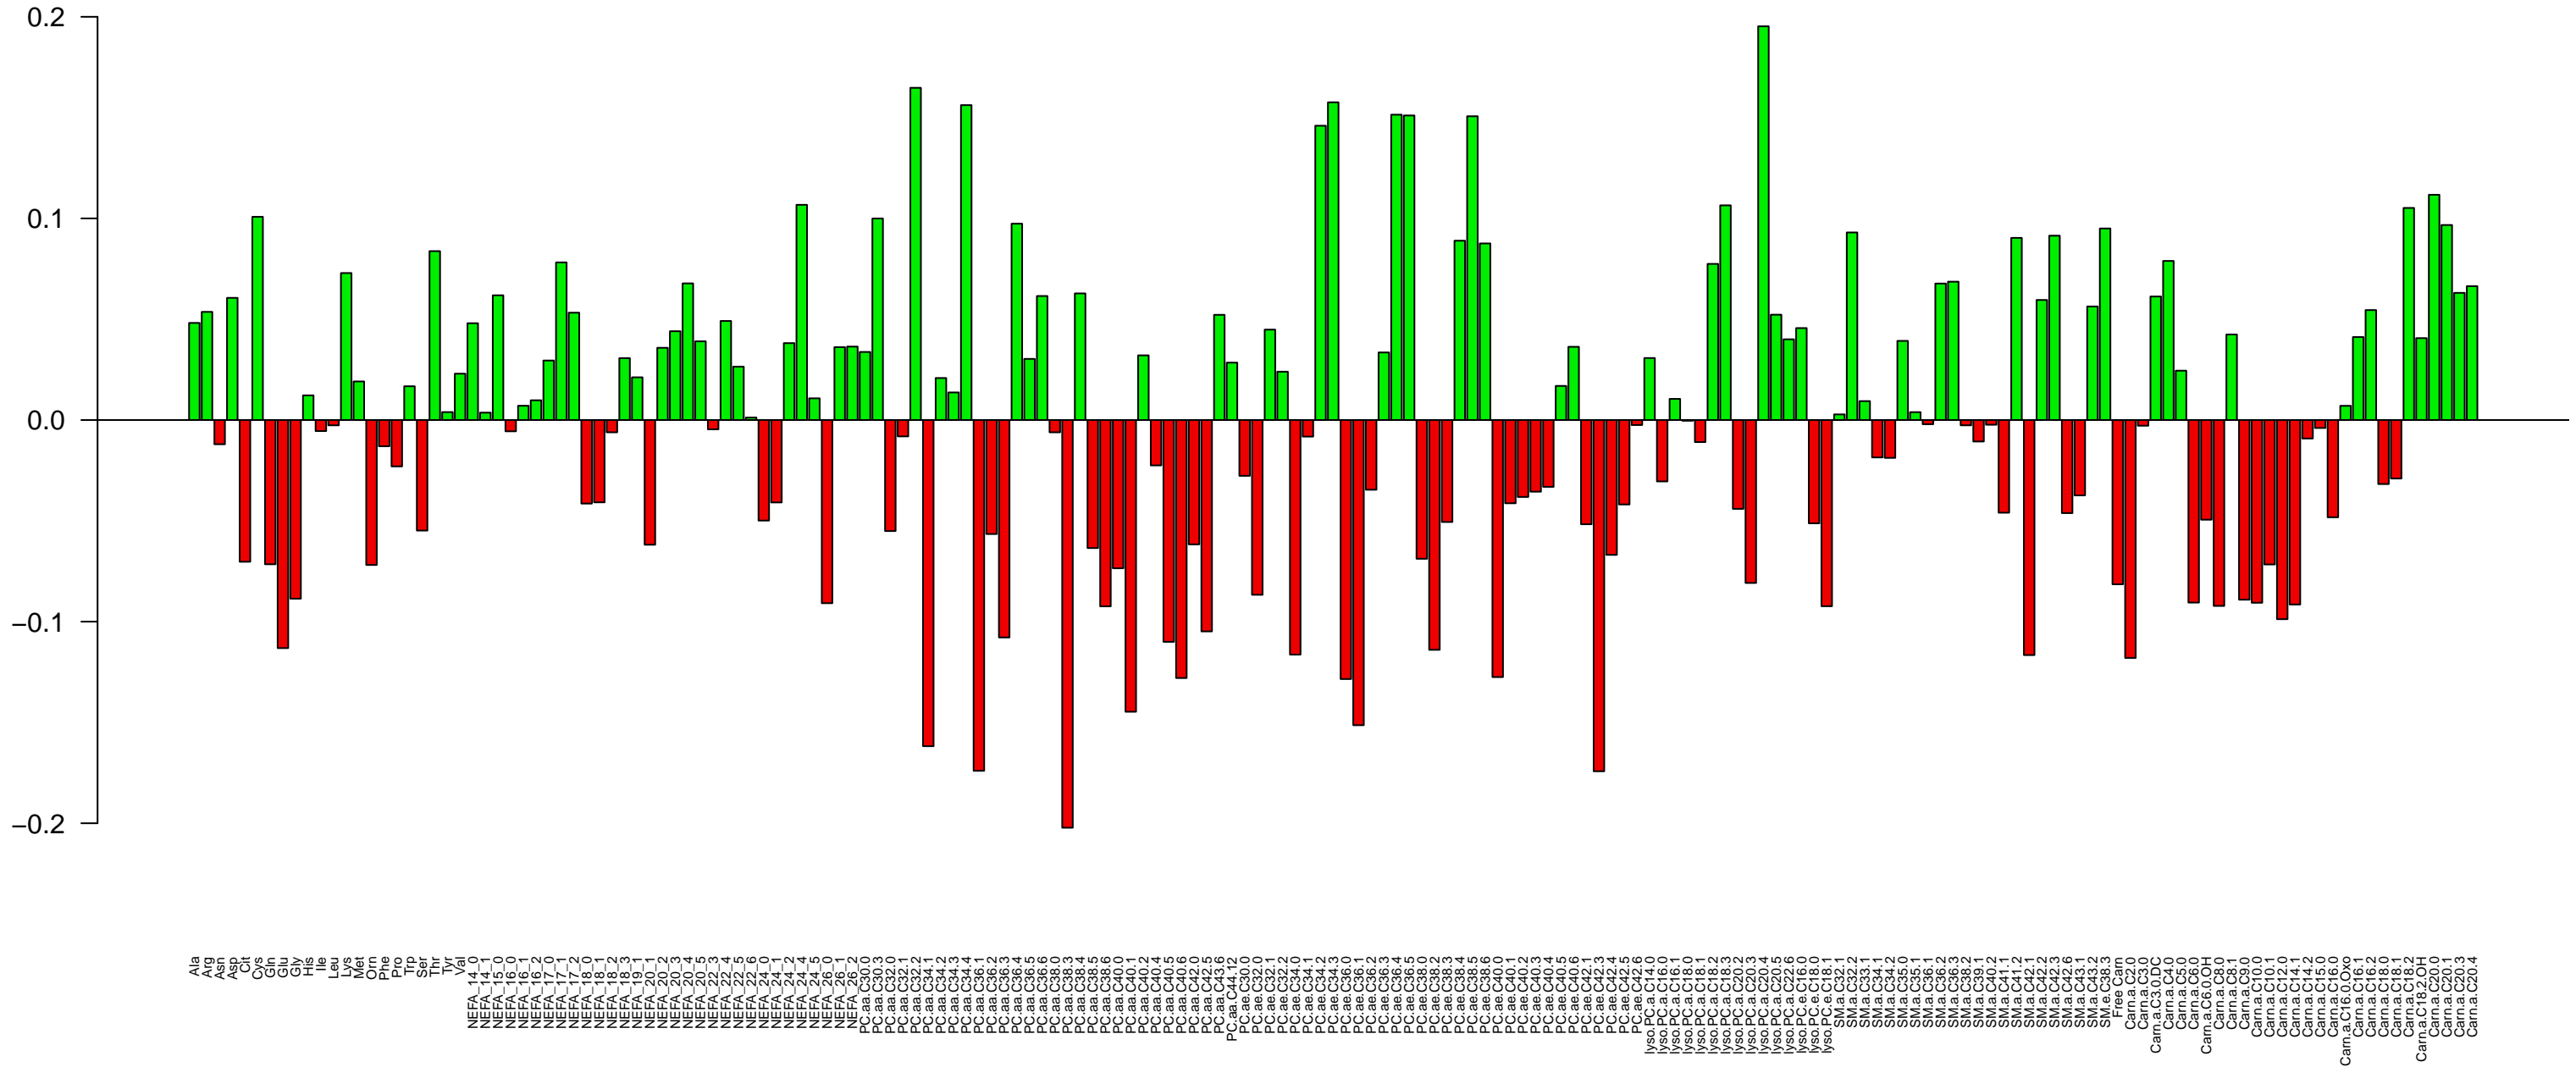

# Child age 10 – PC 19 Loadings

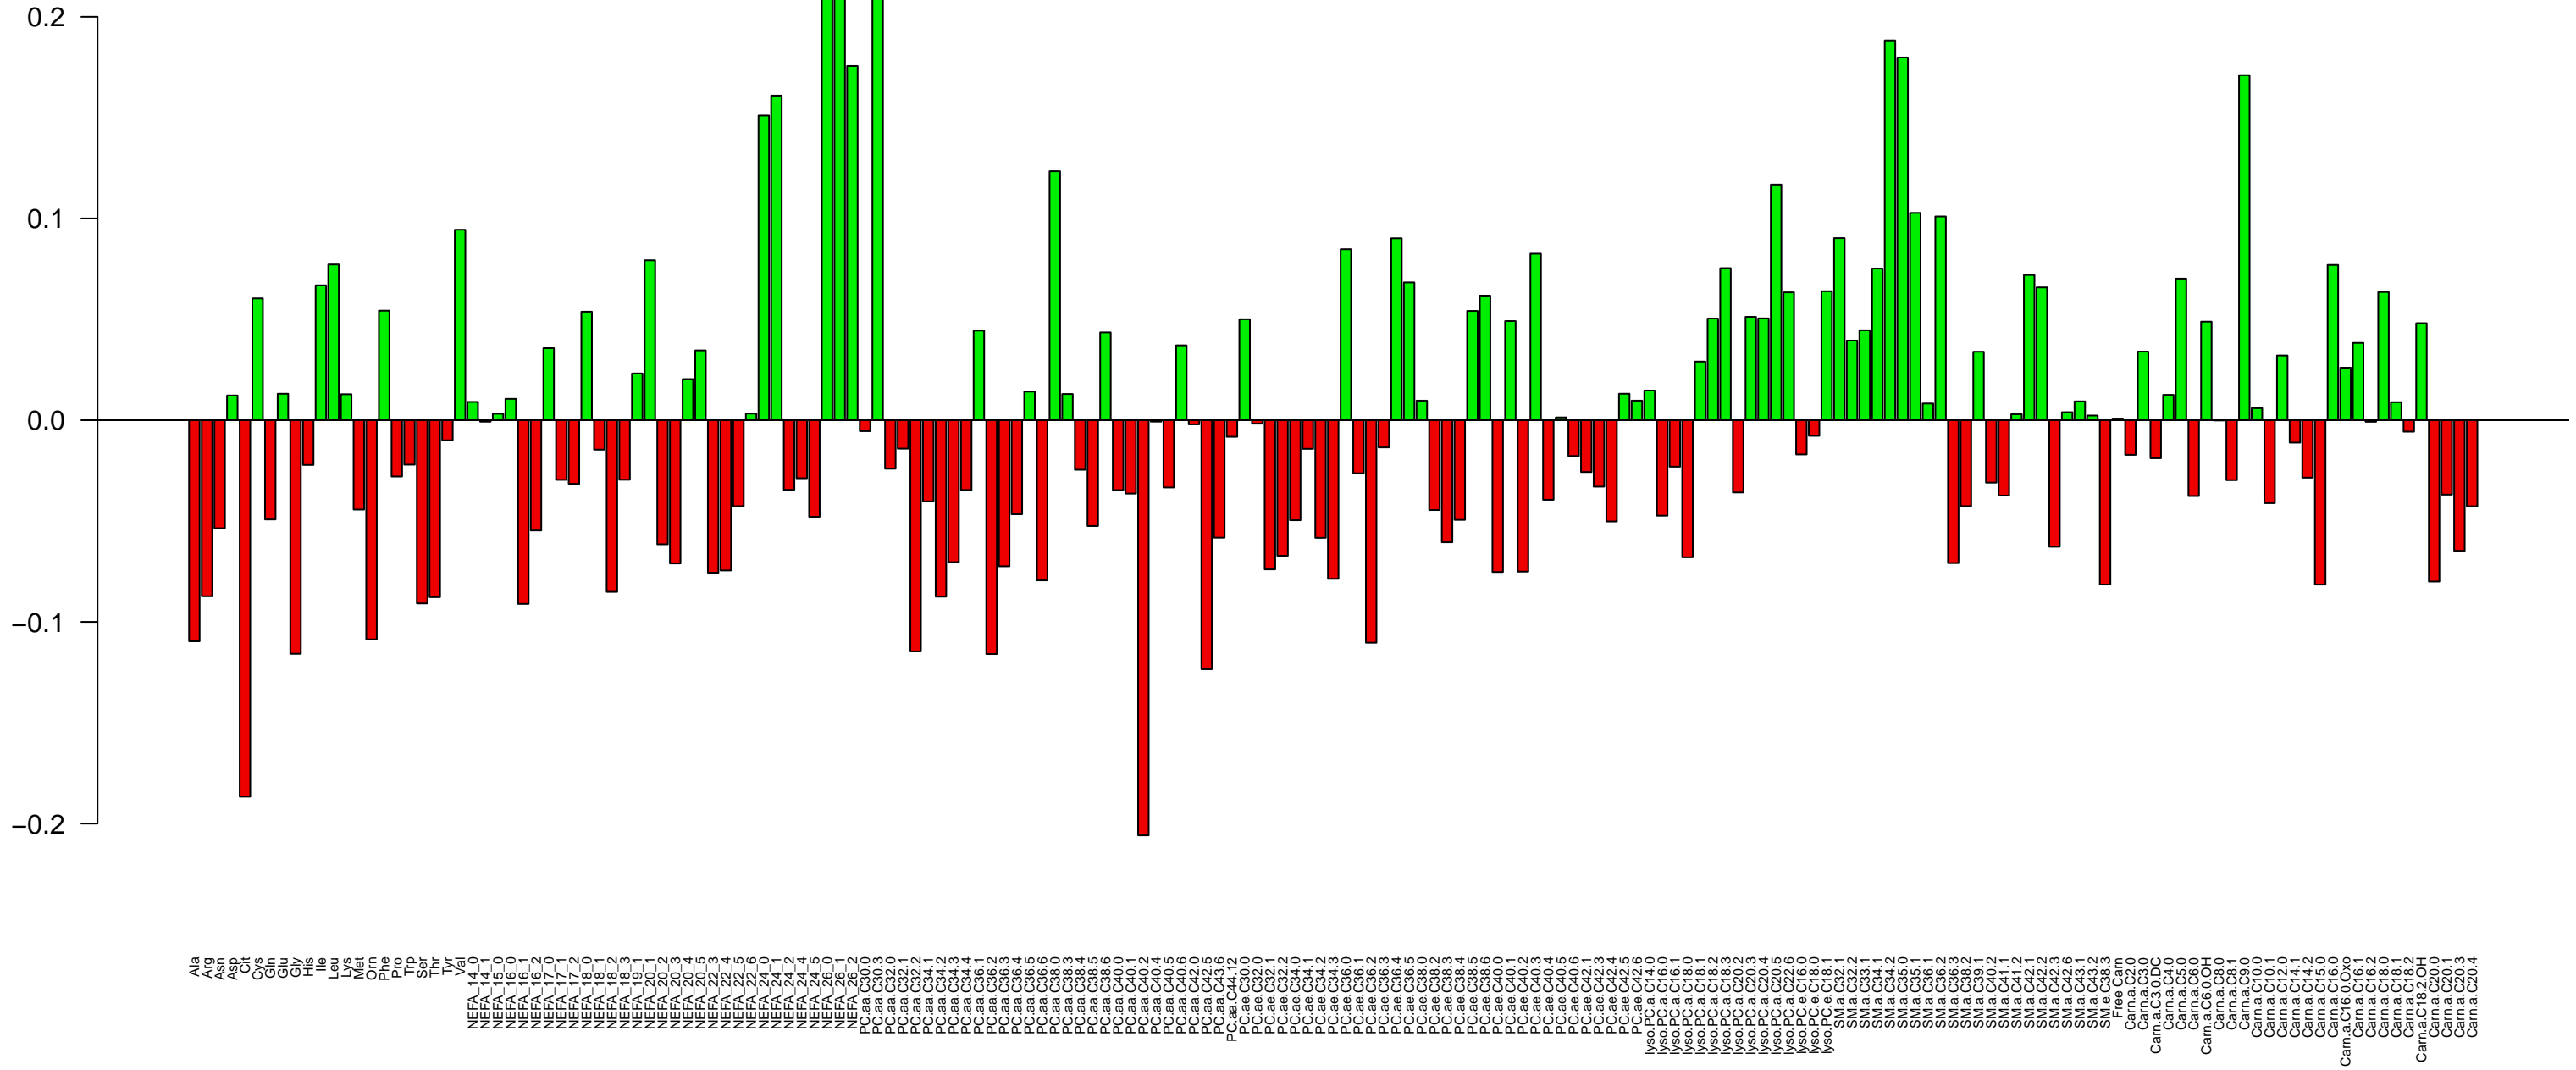

# Child age 10 – PC 20 Loadings

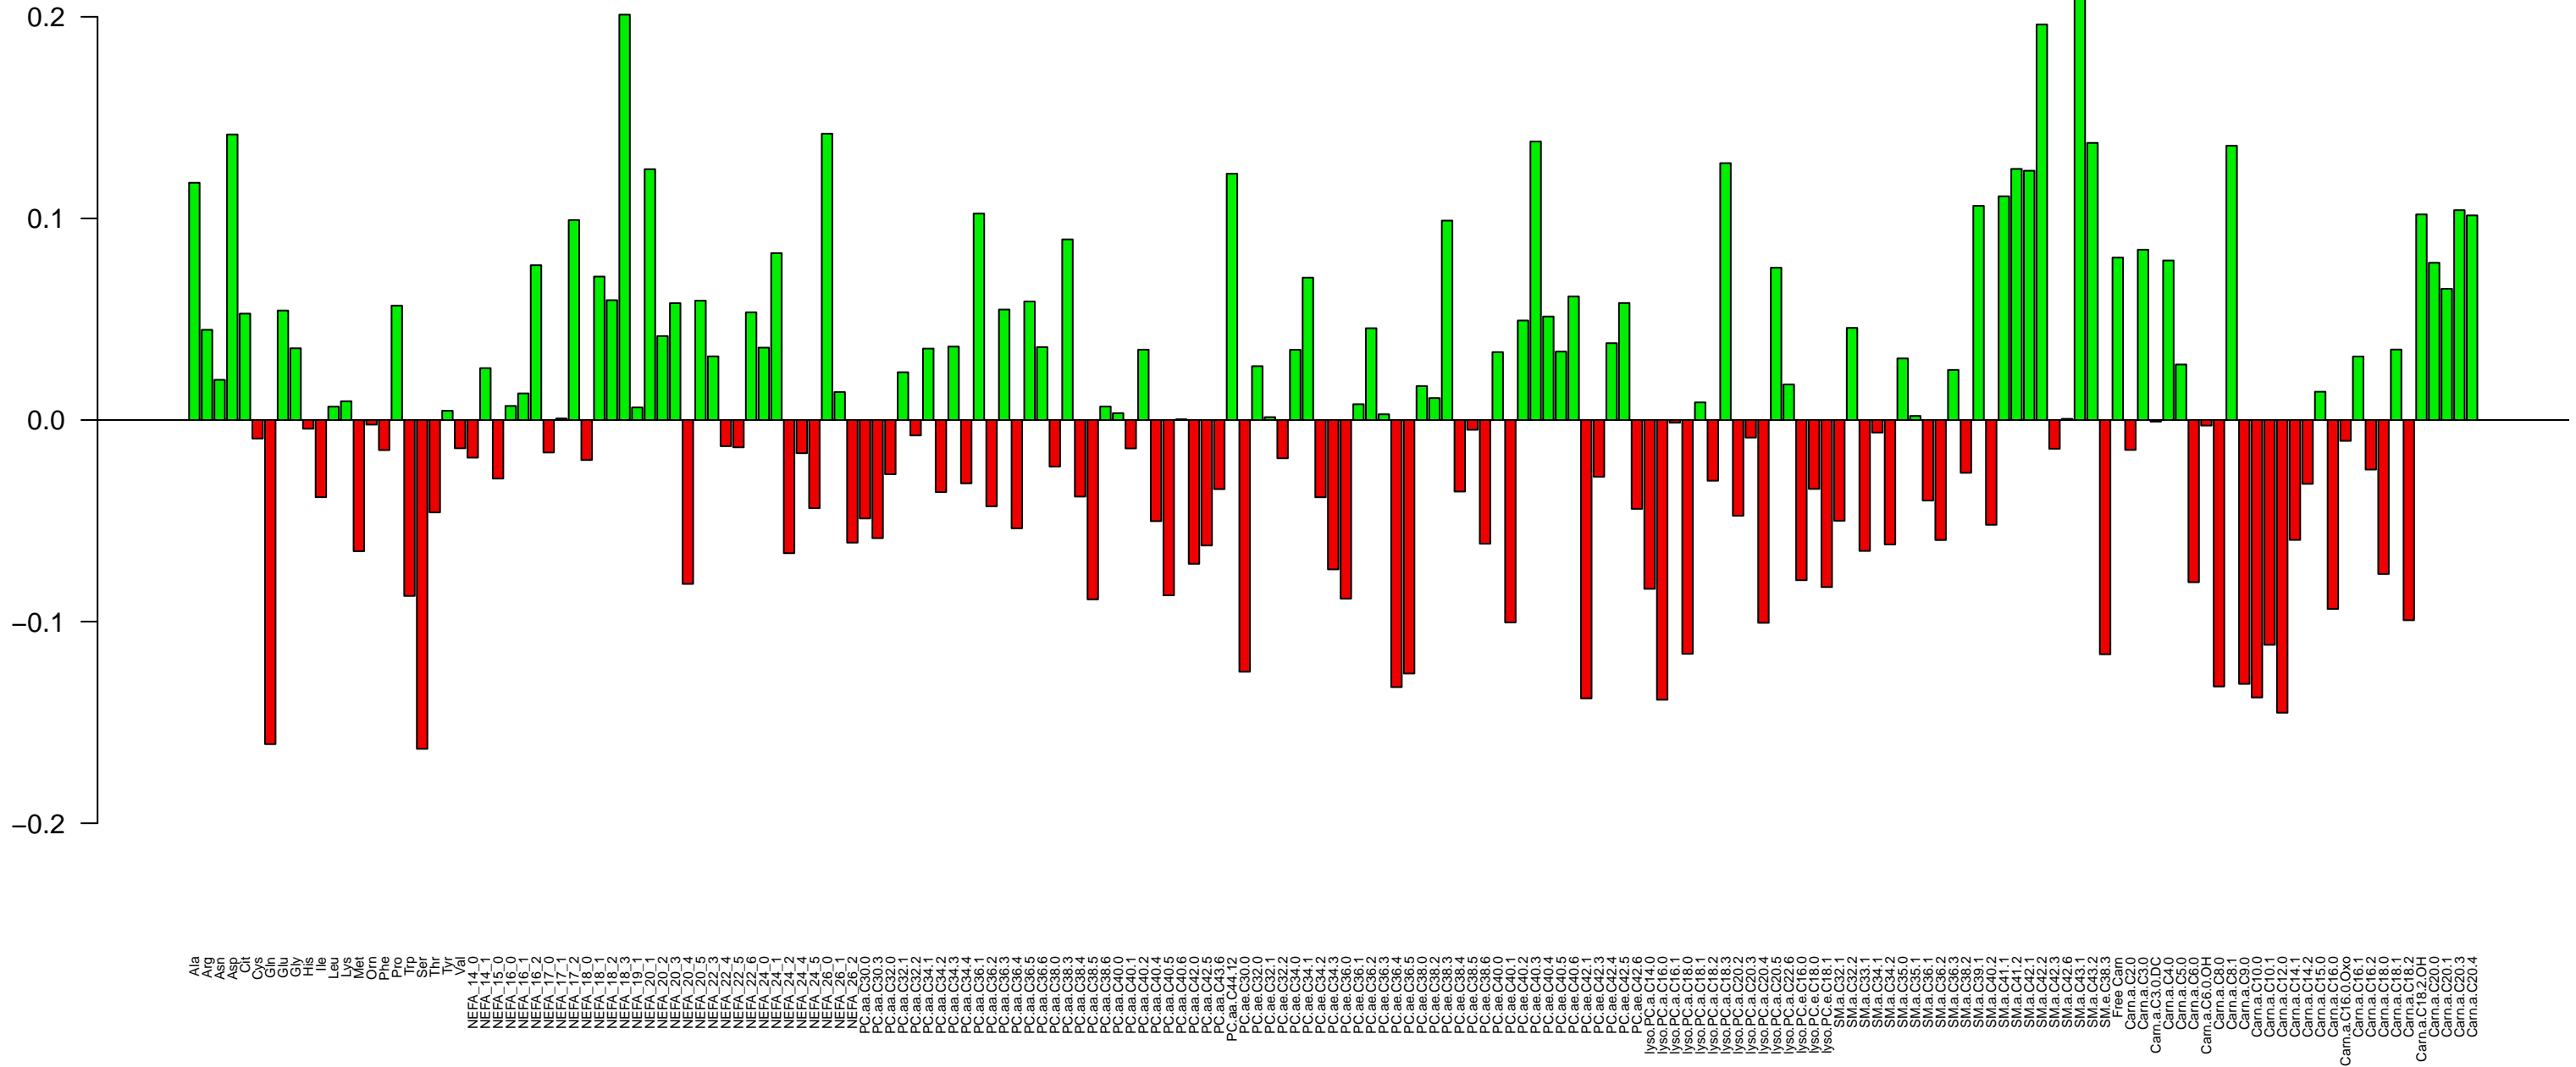

# Child age 10 – PC 21 Loadings

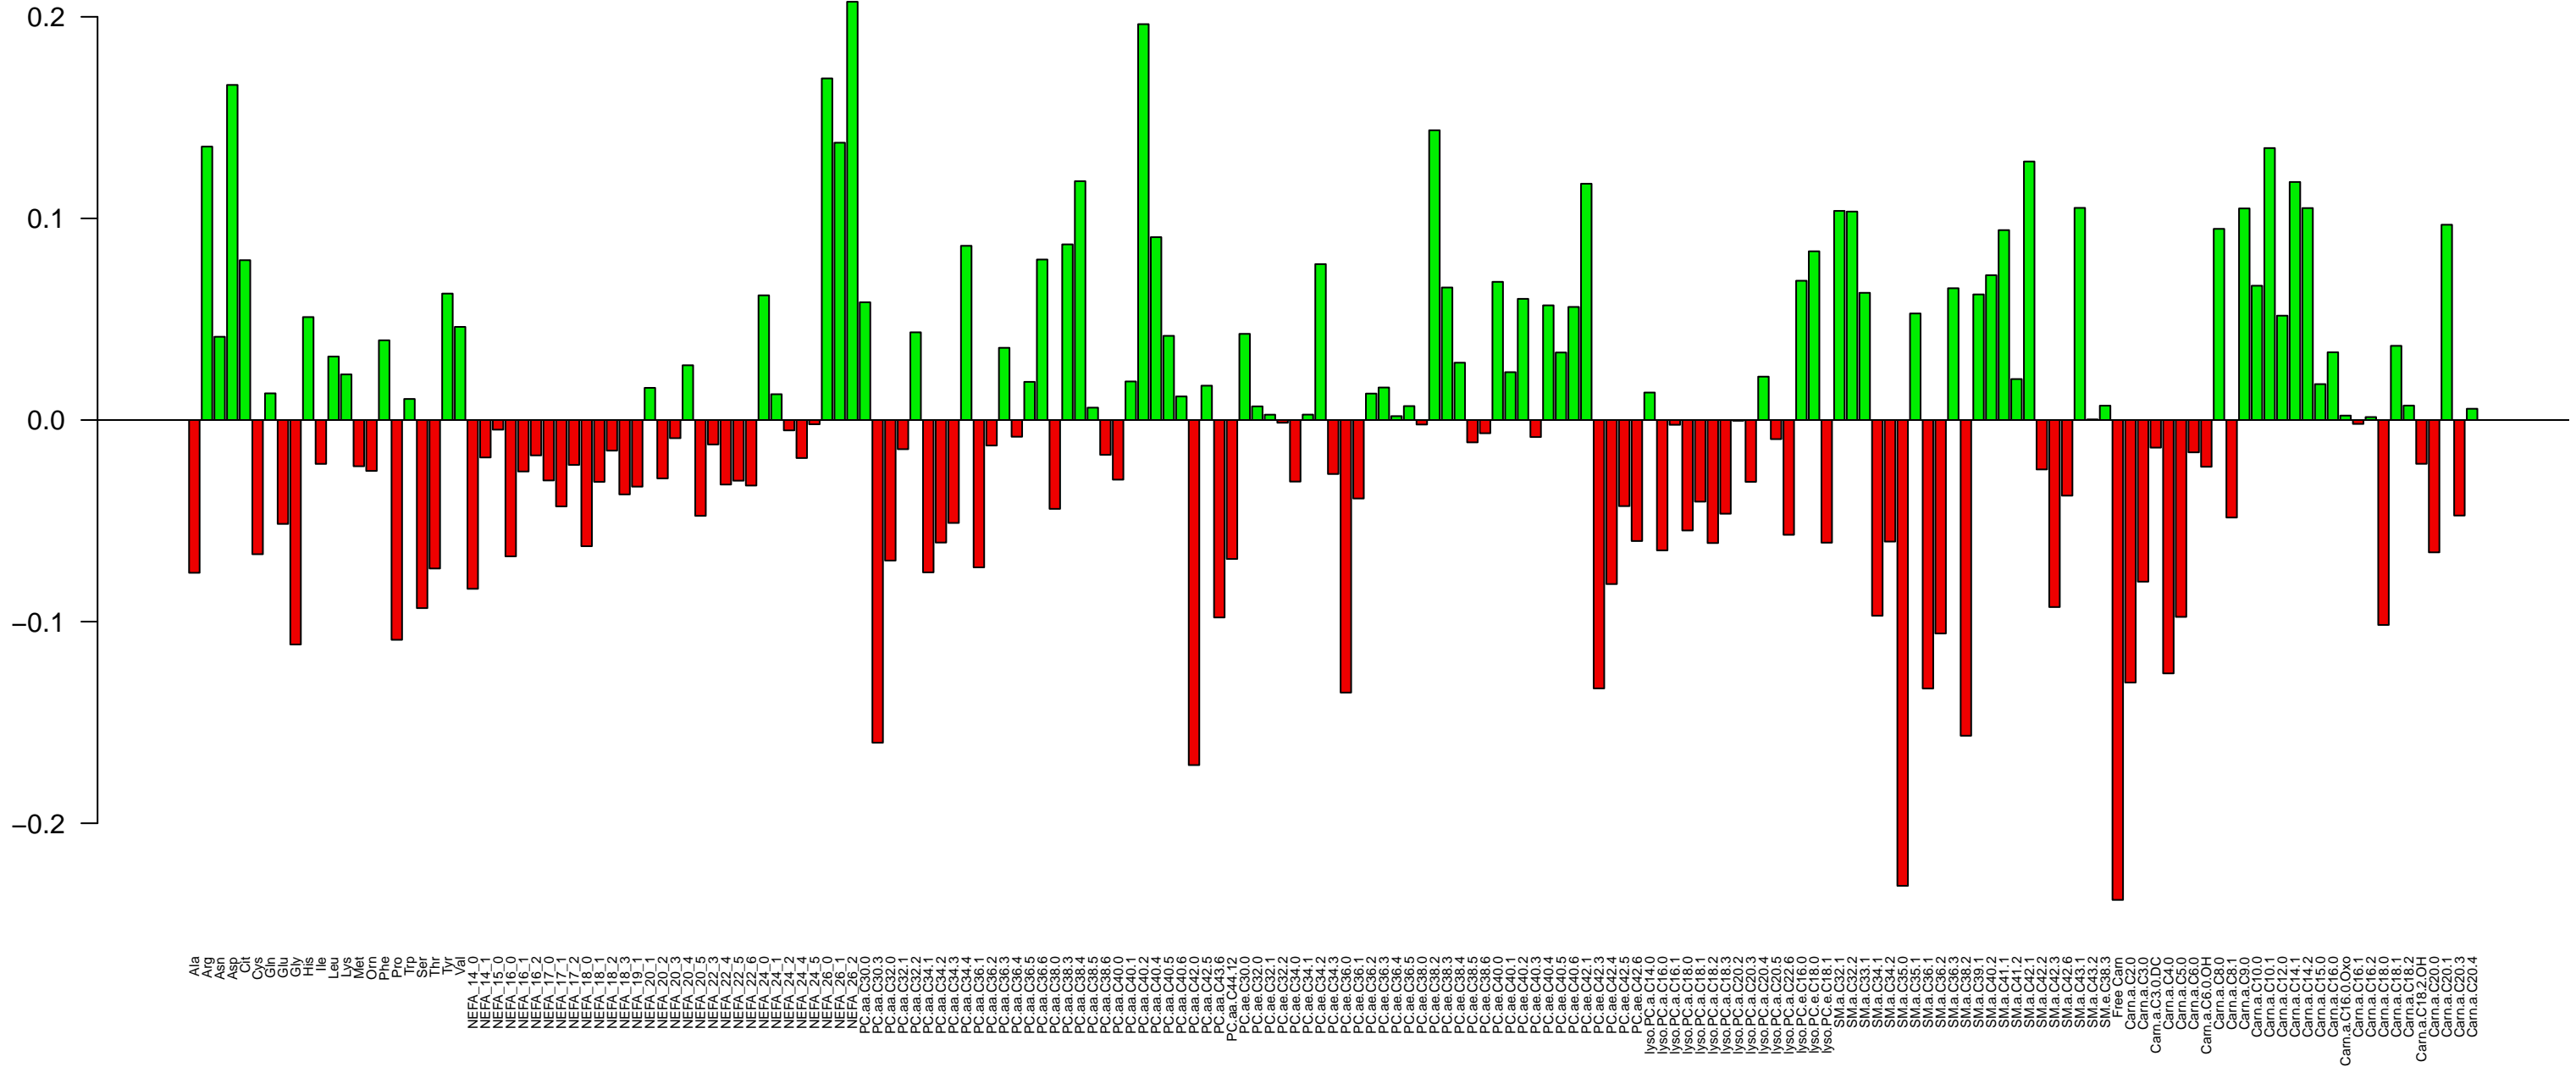

# Child age 10 – PC 22 Loadings

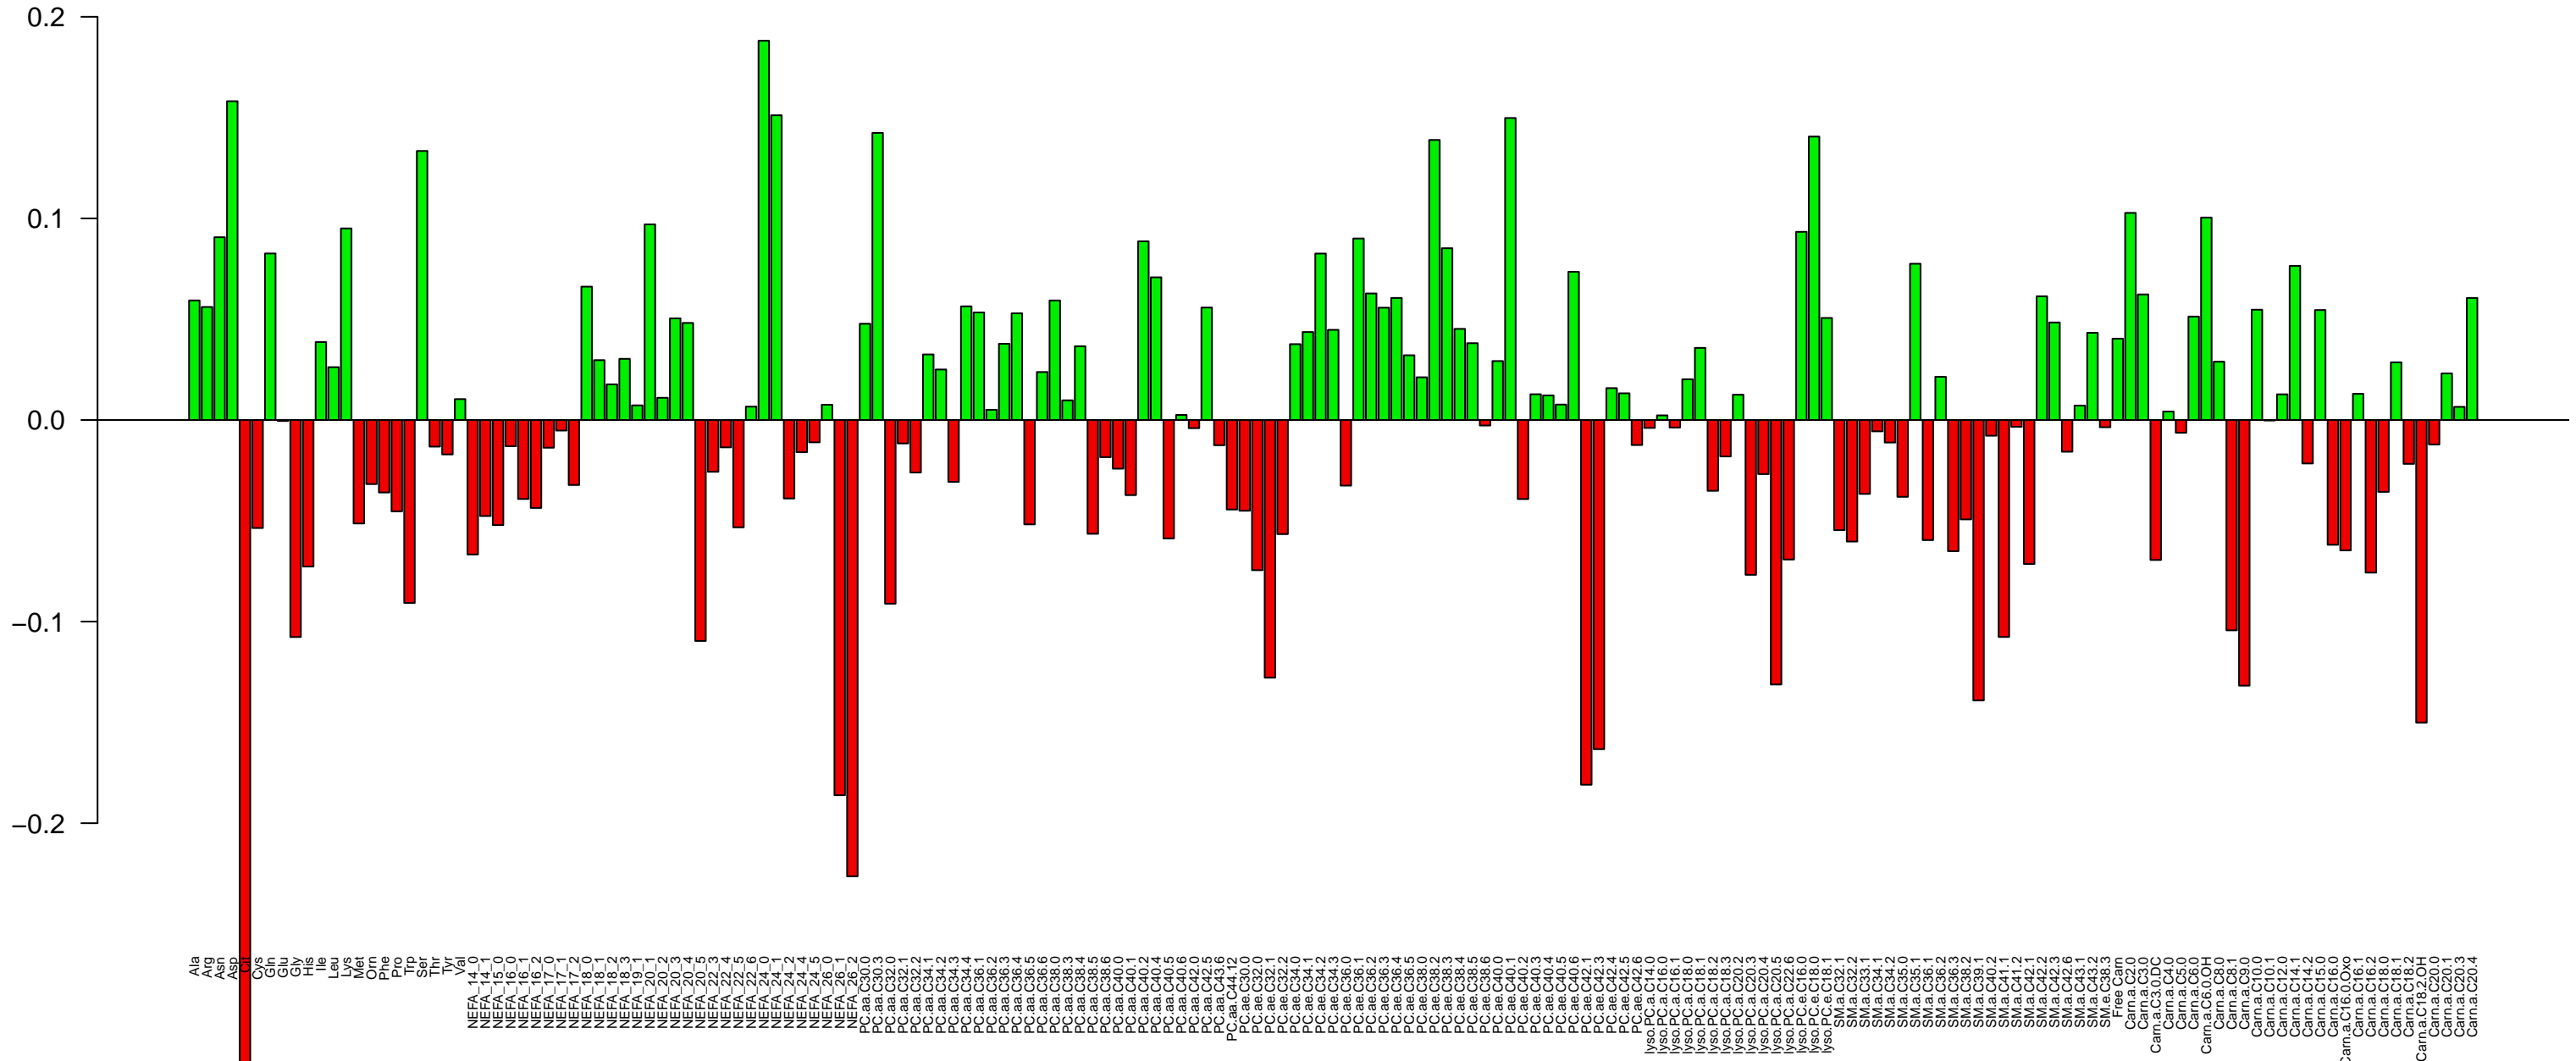

# Child age 10 – PC 23 Loadings

0.2  
0.1  
0.0  
-0.1  
-0.2

Ala  
Arg  
Asn  
Asp  
Cis  
Cln  
Cln  
Gly  
His  
Ile  
Leu  
Lys  
Met  
Orn  
Phe  
Pro  
Trp  
Ser  
Thr  
Val  
Val  
NEFA\_14.0  
NEFA\_14.1  
NEFA\_15.0  
NEFA\_16.0  
NEFA\_16.1  
NEFA\_16.2  
NEFA\_17.0  
NEFA\_17.1  
NEFA\_17.2  
NEFA\_18.0  
NEFA\_18.1  
NEFA\_18.2  
NEFA\_18.3  
NEFA\_19.1  
NEFA\_20.1  
NEFA\_20.2  
NEFA\_20.3  
NEFA\_20.4  
NEFA\_20.5  
NEFA\_22.3  
NEFA\_22.4  
NEFA\_22.5  
NEFA\_22.6  
NEFA\_24.0  
NEFA\_24.1  
NEFA\_24.2  
NEFA\_24.4  
NEFA\_24.5  
NEFA\_26.0  
NEFA\_26.1  
NEFA\_26.2  
PC.aa.C30.0  
PC.aa.C30.3  
PC.aa.C32.0  
PC.aa.C32.1  
PC.aa.C32.2  
PC.aa.C34.1  
PC.aa.C34.2  
PC.aa.C34.3  
PC.aa.C34.4  
PC.aa.C36.1  
PC.aa.C36.2  
PC.aa.C36.3  
PC.aa.C36.4  
PC.aa.C38.0  
PC.aa.C38.2  
PC.aa.C38.3  
PC.aa.C38.4  
PC.aa.C38.5  
PC.aa.C38.6  
PC.aa.C40.0  
PC.aa.C40.1  
PC.aa.C40.2  
PC.aa.C40.4  
PC.aa.C40.5  
PC.aa.C40.6  
PC.aa.C42.0  
PC.aa.C42.5  
PC.aa.C42.9  
PC.aa.C44.1  
PC.aa.C30.0  
PC.aa.C32.0  
PC.aa.C32.1  
PC.aa.C32.2  
PC.aa.C34.0  
PC.aa.C34.1  
PC.aa.C34.2  
PC.aa.C34.3  
PC.aa.C36.0  
PC.aa.C36.1  
PC.aa.C36.2  
PC.aa.C36.3  
PC.aa.C36.4  
PC.aa.C38.0  
PC.aa.C38.2  
PC.aa.C38.3  
PC.aa.C38.4  
PC.aa.C38.5  
PC.aa.C40.0  
PC.aa.C40.1  
PC.aa.C40.2  
PC.aa.C40.3  
PC.aa.C40.4  
PC.aa.C40.5  
PC.aa.C40.6  
PC.aa.C42.1  
PC.aa.C42.3  
PC.aa.C42.4  
PC.aa.C42.5  
PC.aa.C42.6  
Iyso.PC.a.C14.0  
Iyso.PC.a.C16.0  
Iyso.PC.a.C16.1  
Iyso.PC.a.C18.0  
Iyso.PC.a.C18.1  
Iyso.PC.a.C18.2  
Iyso.PC.a.C18.3  
Iyso.PC.a.C20.2  
Iyso.PC.a.C20.3  
Iyso.PC.a.C20.4  
Iyso.PC.a.C20.5  
Iyso.PC.a.C22.0  
Iyso.PC.a.C22.6  
Iyso.PC.e.C18.0  
Iyso.PC.e.C18.1  
SM.a.C32.1  
SM.a.C32.2  
SM.a.C33.1  
SM.a.C34.1  
SM.a.C34.2  
SM.a.C35.0  
SM.a.C36.1  
SM.a.C36.2  
SM.a.C36.3  
SM.a.C38.2  
SM.a.C40.1  
SM.a.C41.1  
SM.a.C41.2  
SM.a.C42.1  
SM.a.C42.2  
SM.a.C42.3  
SM.a.C43.1  
SM.a.C43.2  
SM.a.C43.3  
Free Carn  
Carn.a.C2.0  
Carn.a.C3.0  
Carn.a.C3.0.DC  
Carn.a.C4.0  
Carn.a.C6.0  
Carn.a.C6.0.OH  
Carn.a.C8.0  
Carn.a.C8.1  
Carn.a.C9.0  
Carn.a.C10.0  
Carn.a.C10.1  
Carn.a.C12.0  
Carn.a.C14.1  
Carn.a.C14.2  
Carn.a.C15.0  
Carn.a.C16.0  
Carn.a.C16.0.Ox  
Carn.a.C16.1  
Carn.a.C18.2  
Carn.a.C18.1  
Carn.a.C18.2  
Carn.a.C18.2.OH  
Carn.a.C20.0  
Carn.a.C20.1  
Carn.a.C20.3  
Carn.a.C20.4

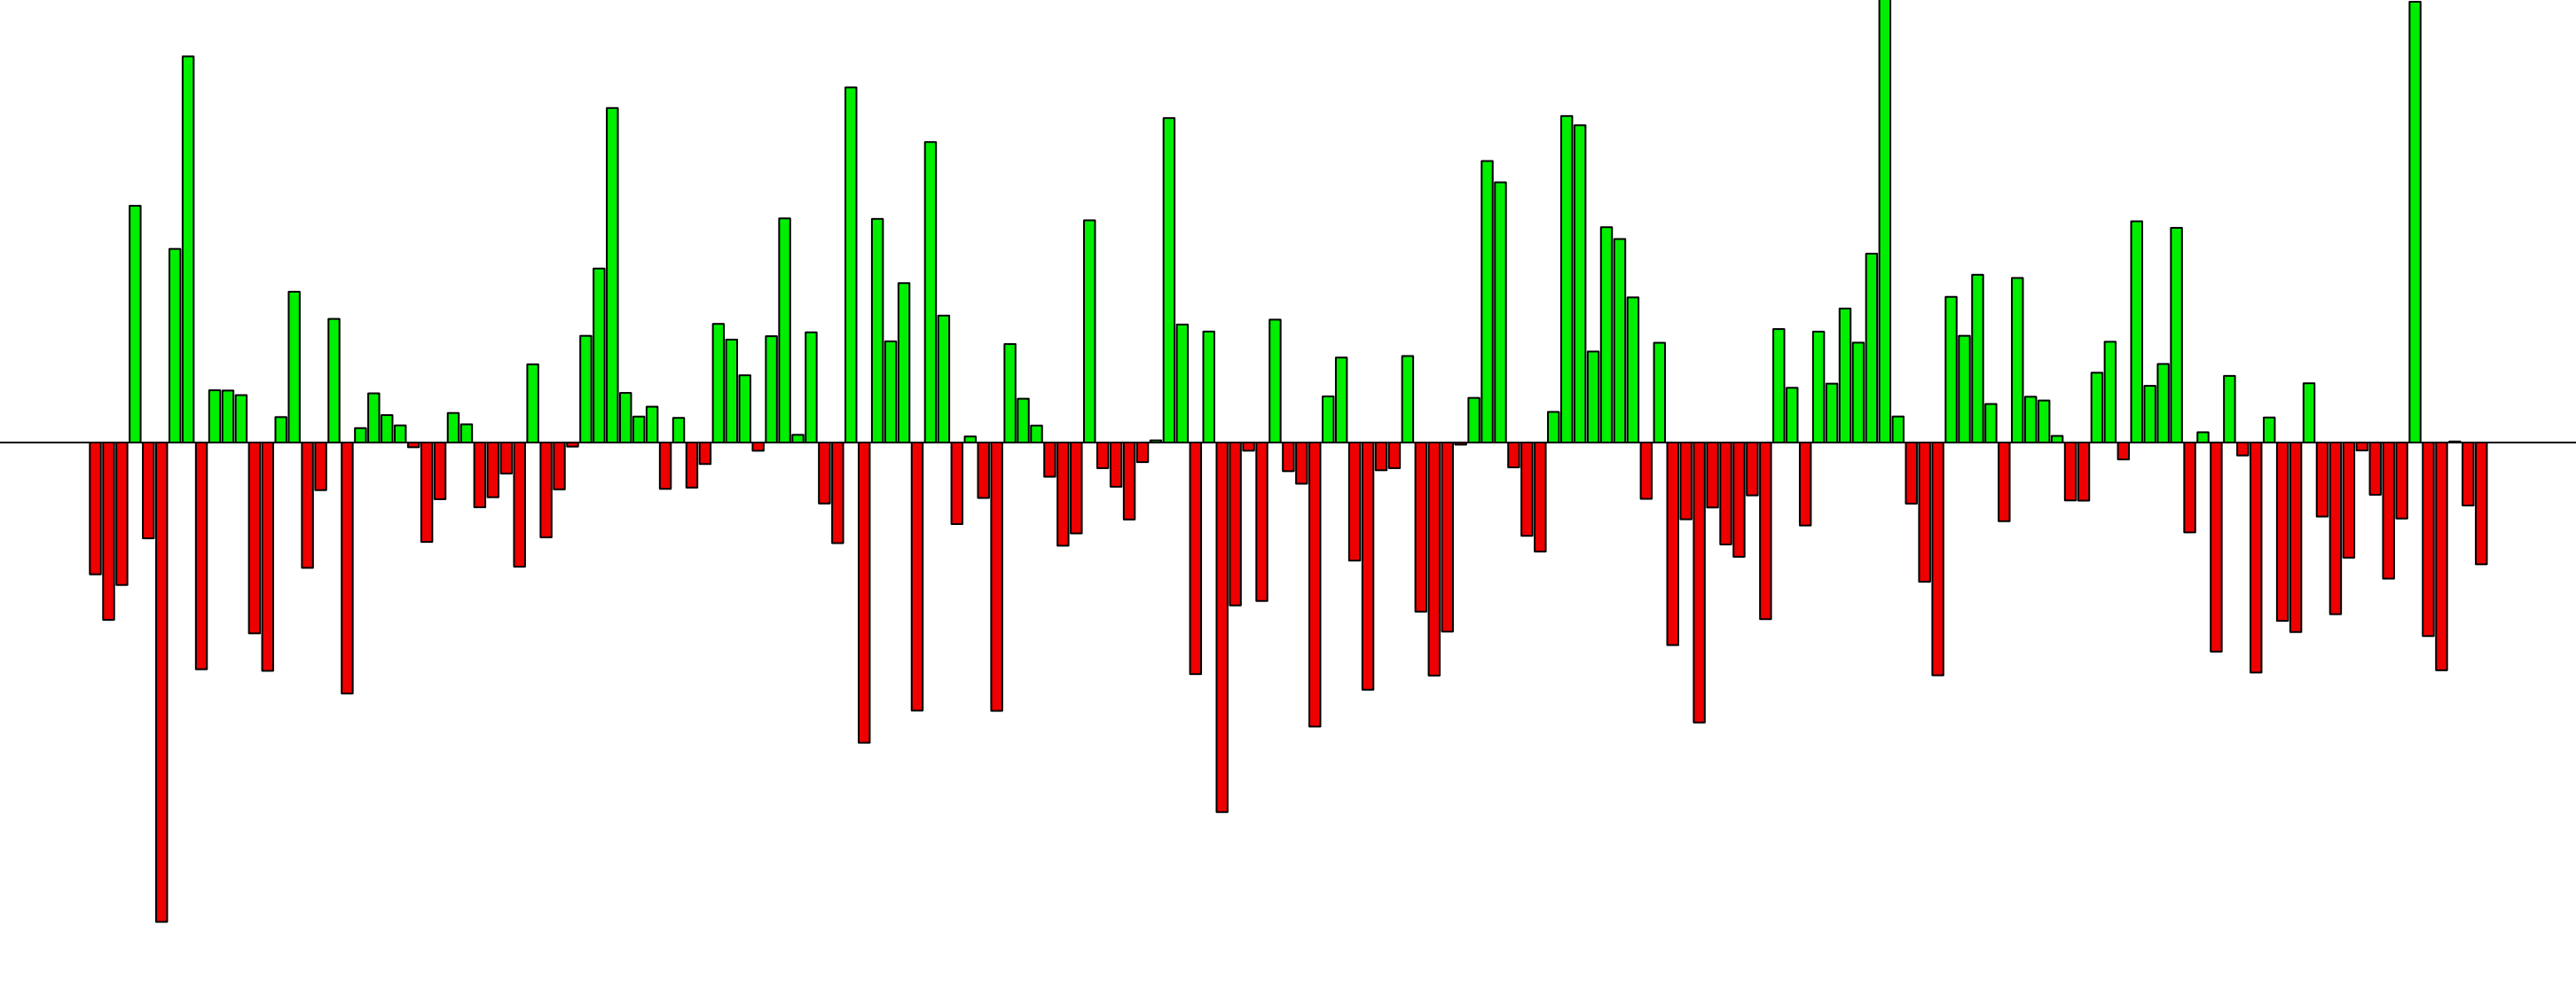

# Child age 10 – PC 24 Loadings

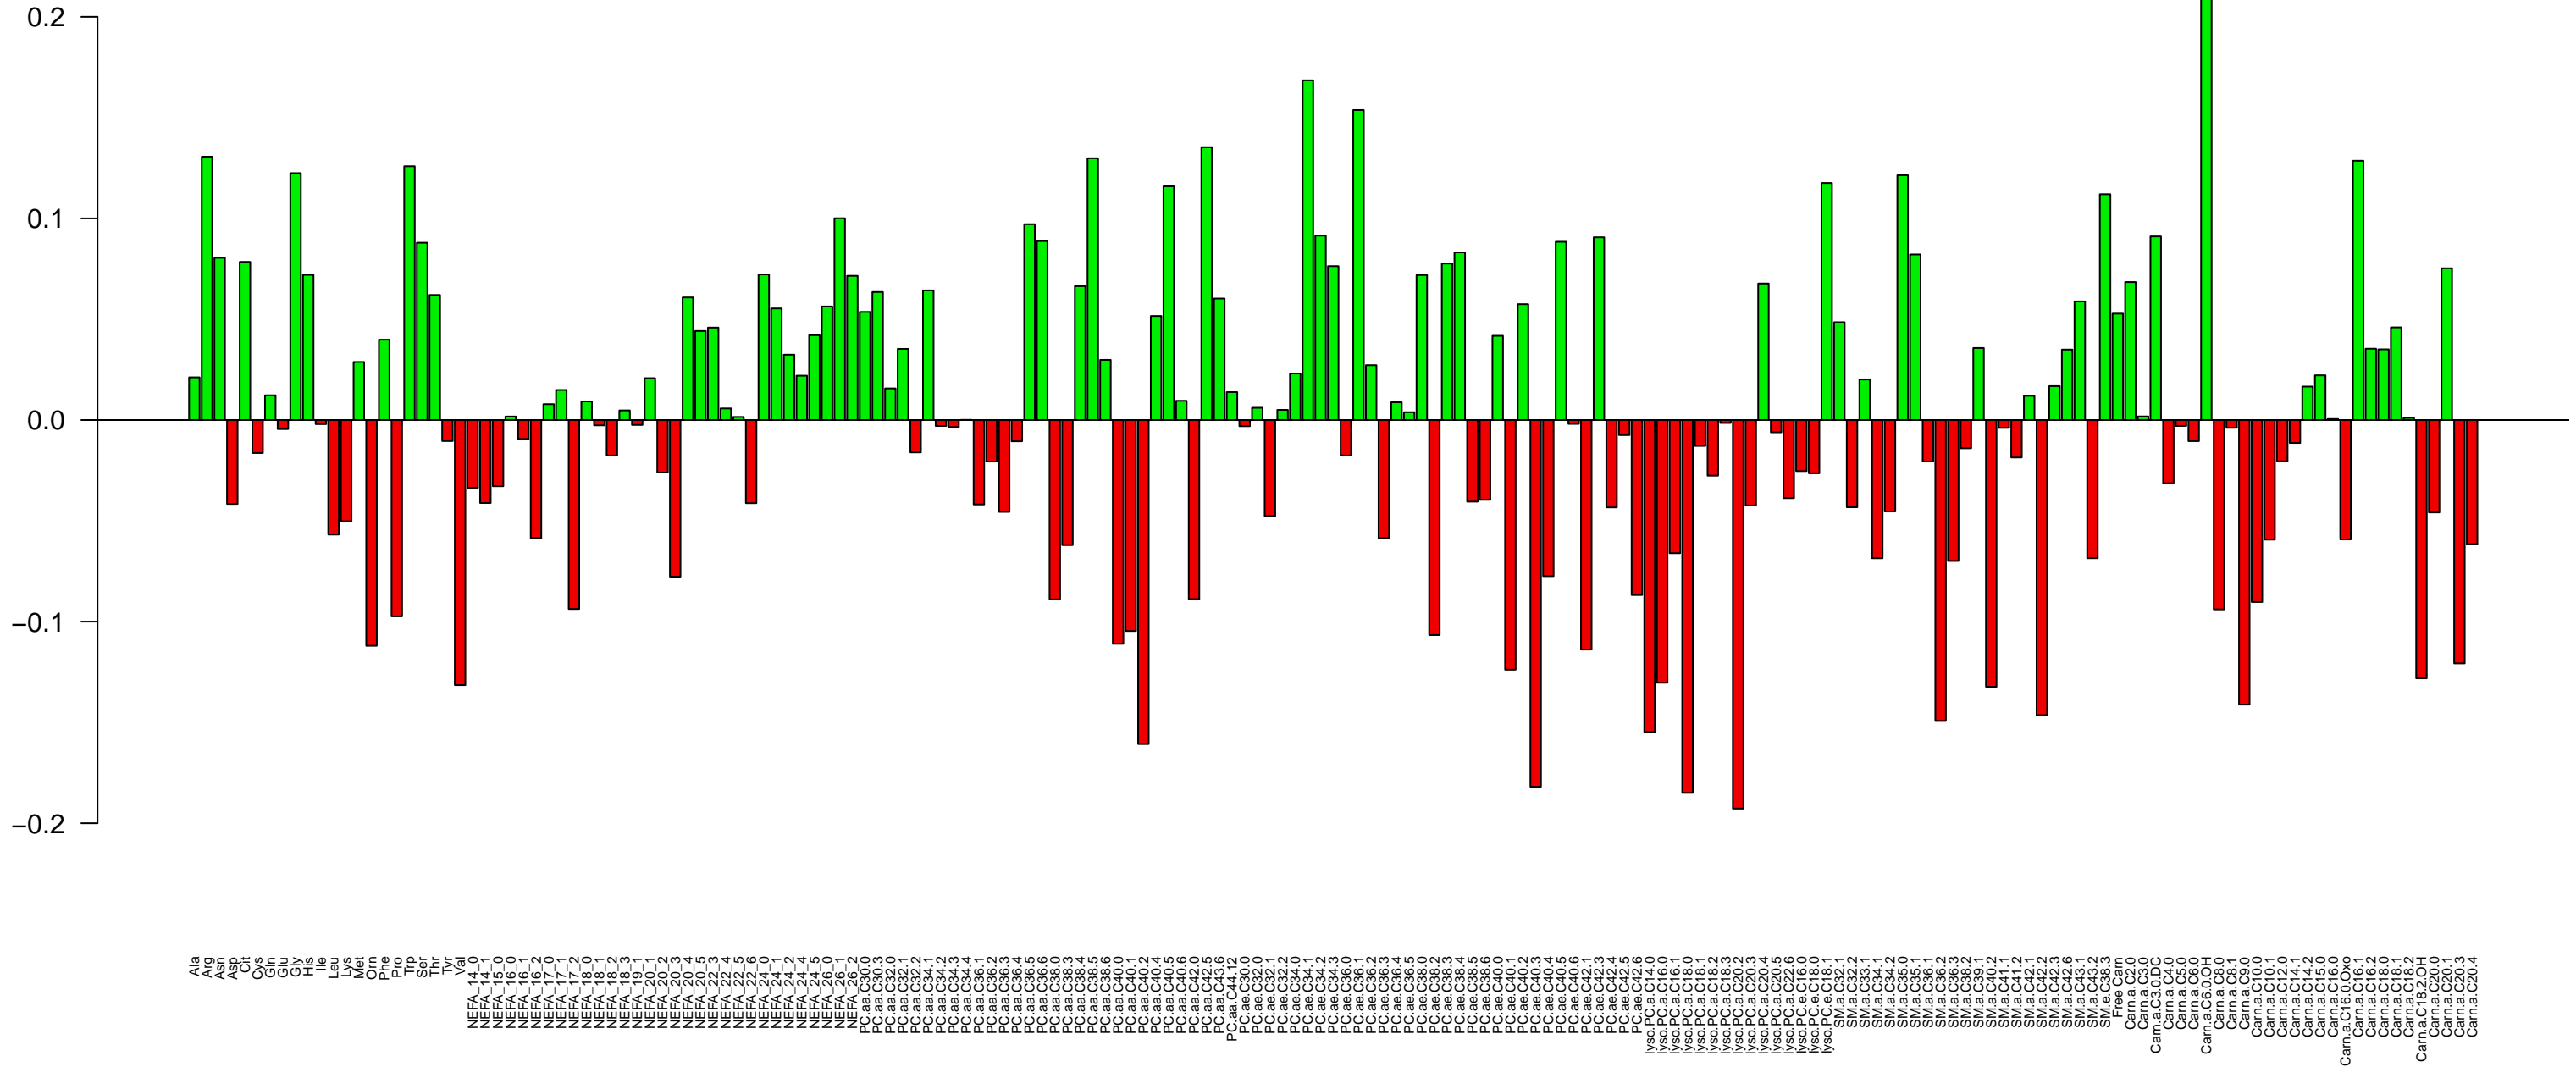



# Child age 10 – PC 25 Loadings

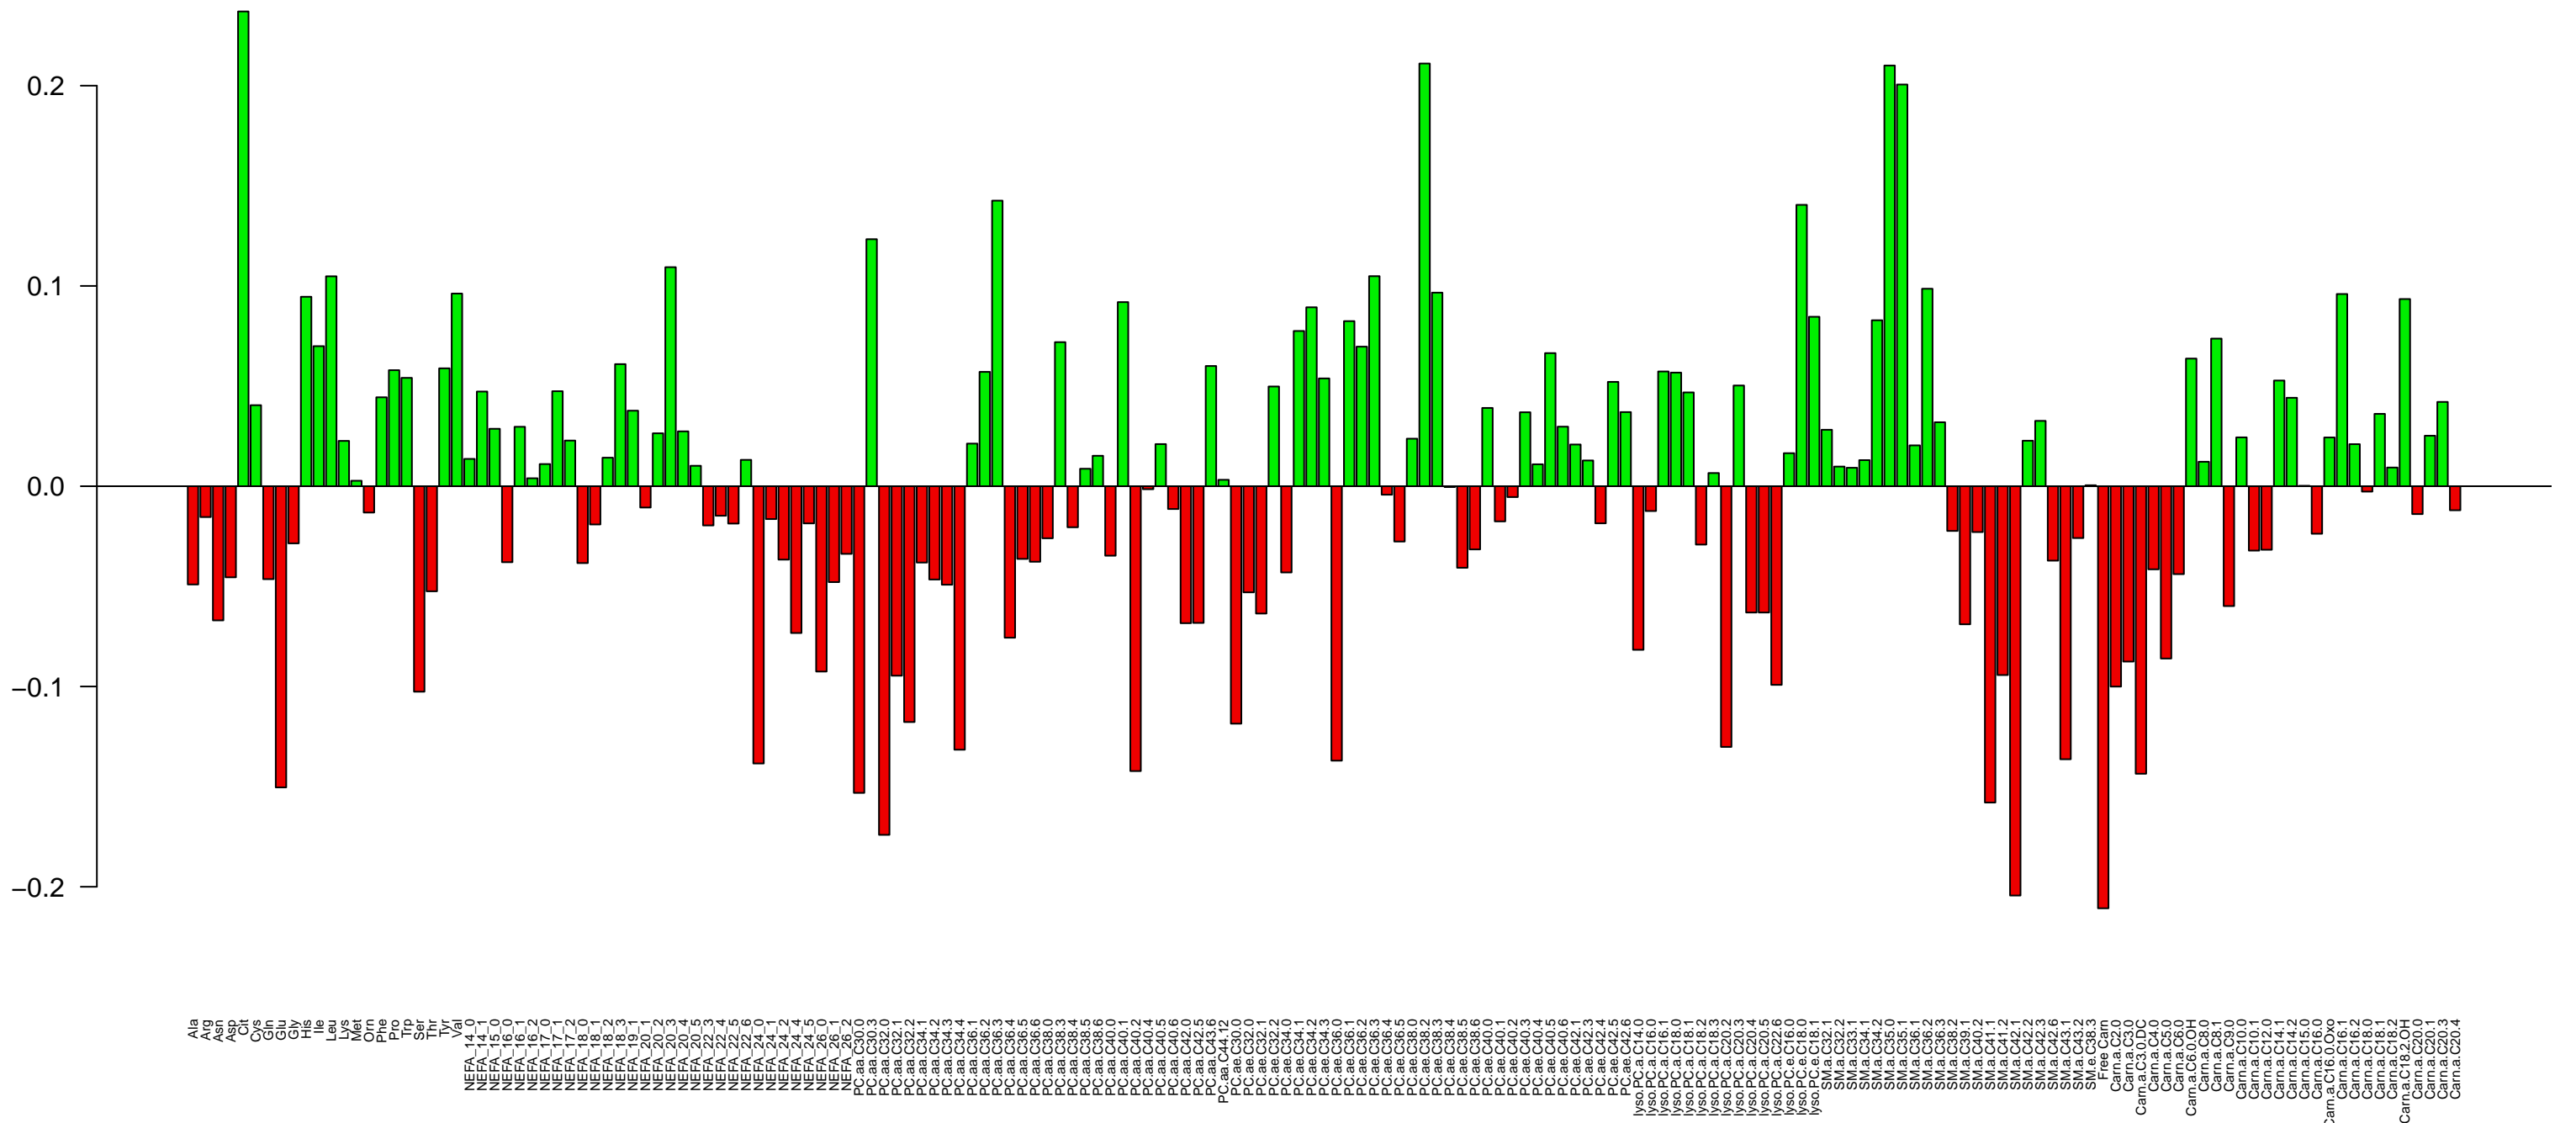

Supplement: 11306_2020_1667_MOESM8_ESM.pdf [file 11306_2020_1667_MOESM8_ESM.pdf]
