# Supplementary material for: A population-based resource for intergenerational metabolomics analyses in pregnant women and their children: the Generation R Study
Source: PubMed Central journal article supplement (PMC7089886; doi:10.1007/s11306-020-01667-1), 2020-03-23

# Child at birth – PC 4 Loadings

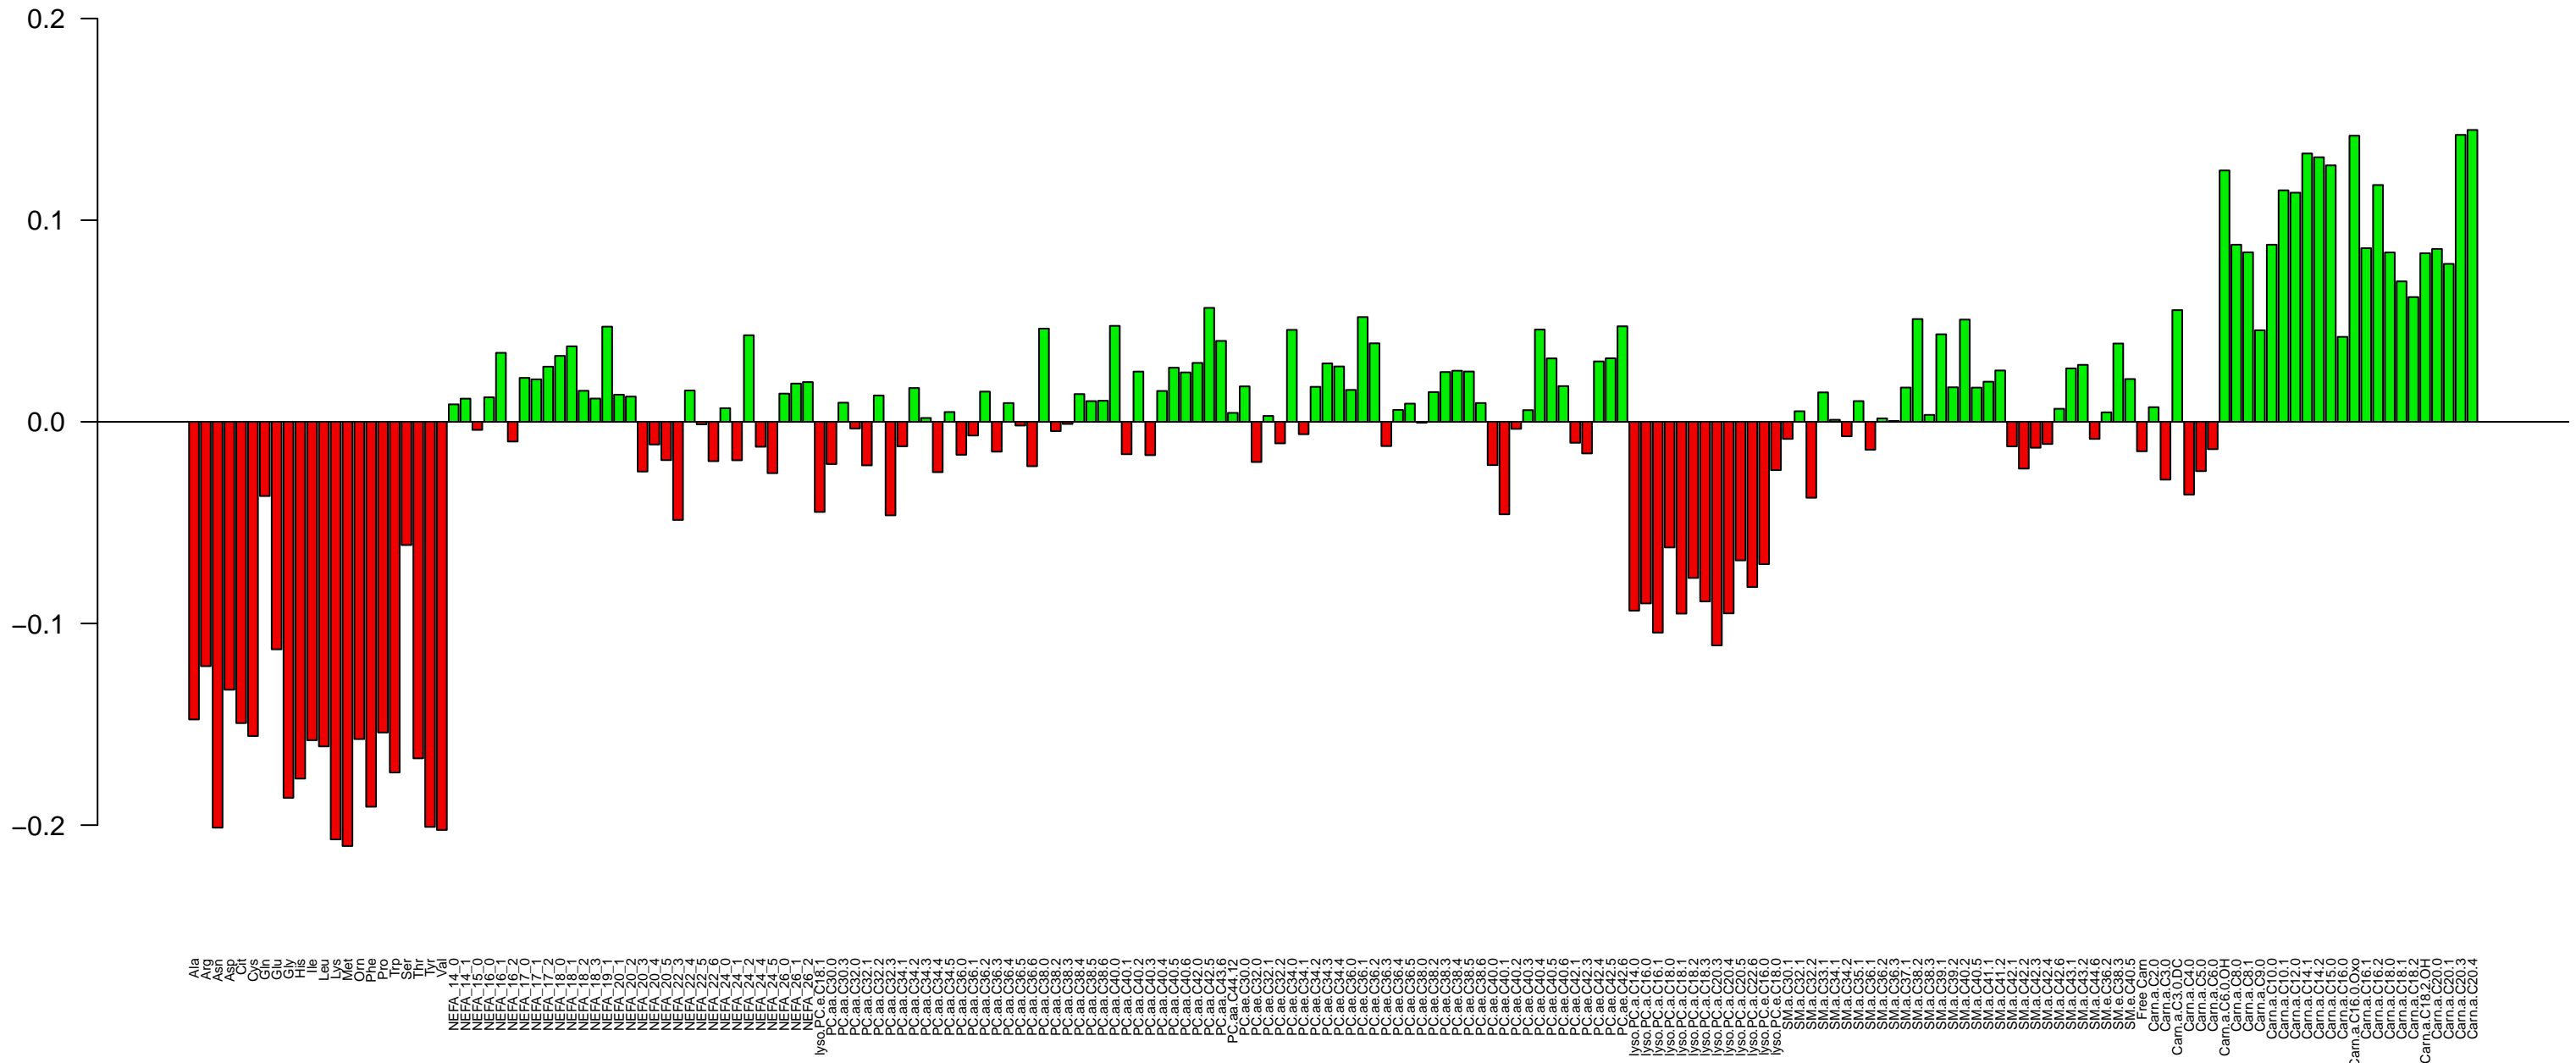













### Child at birth – PC 10 Loadings

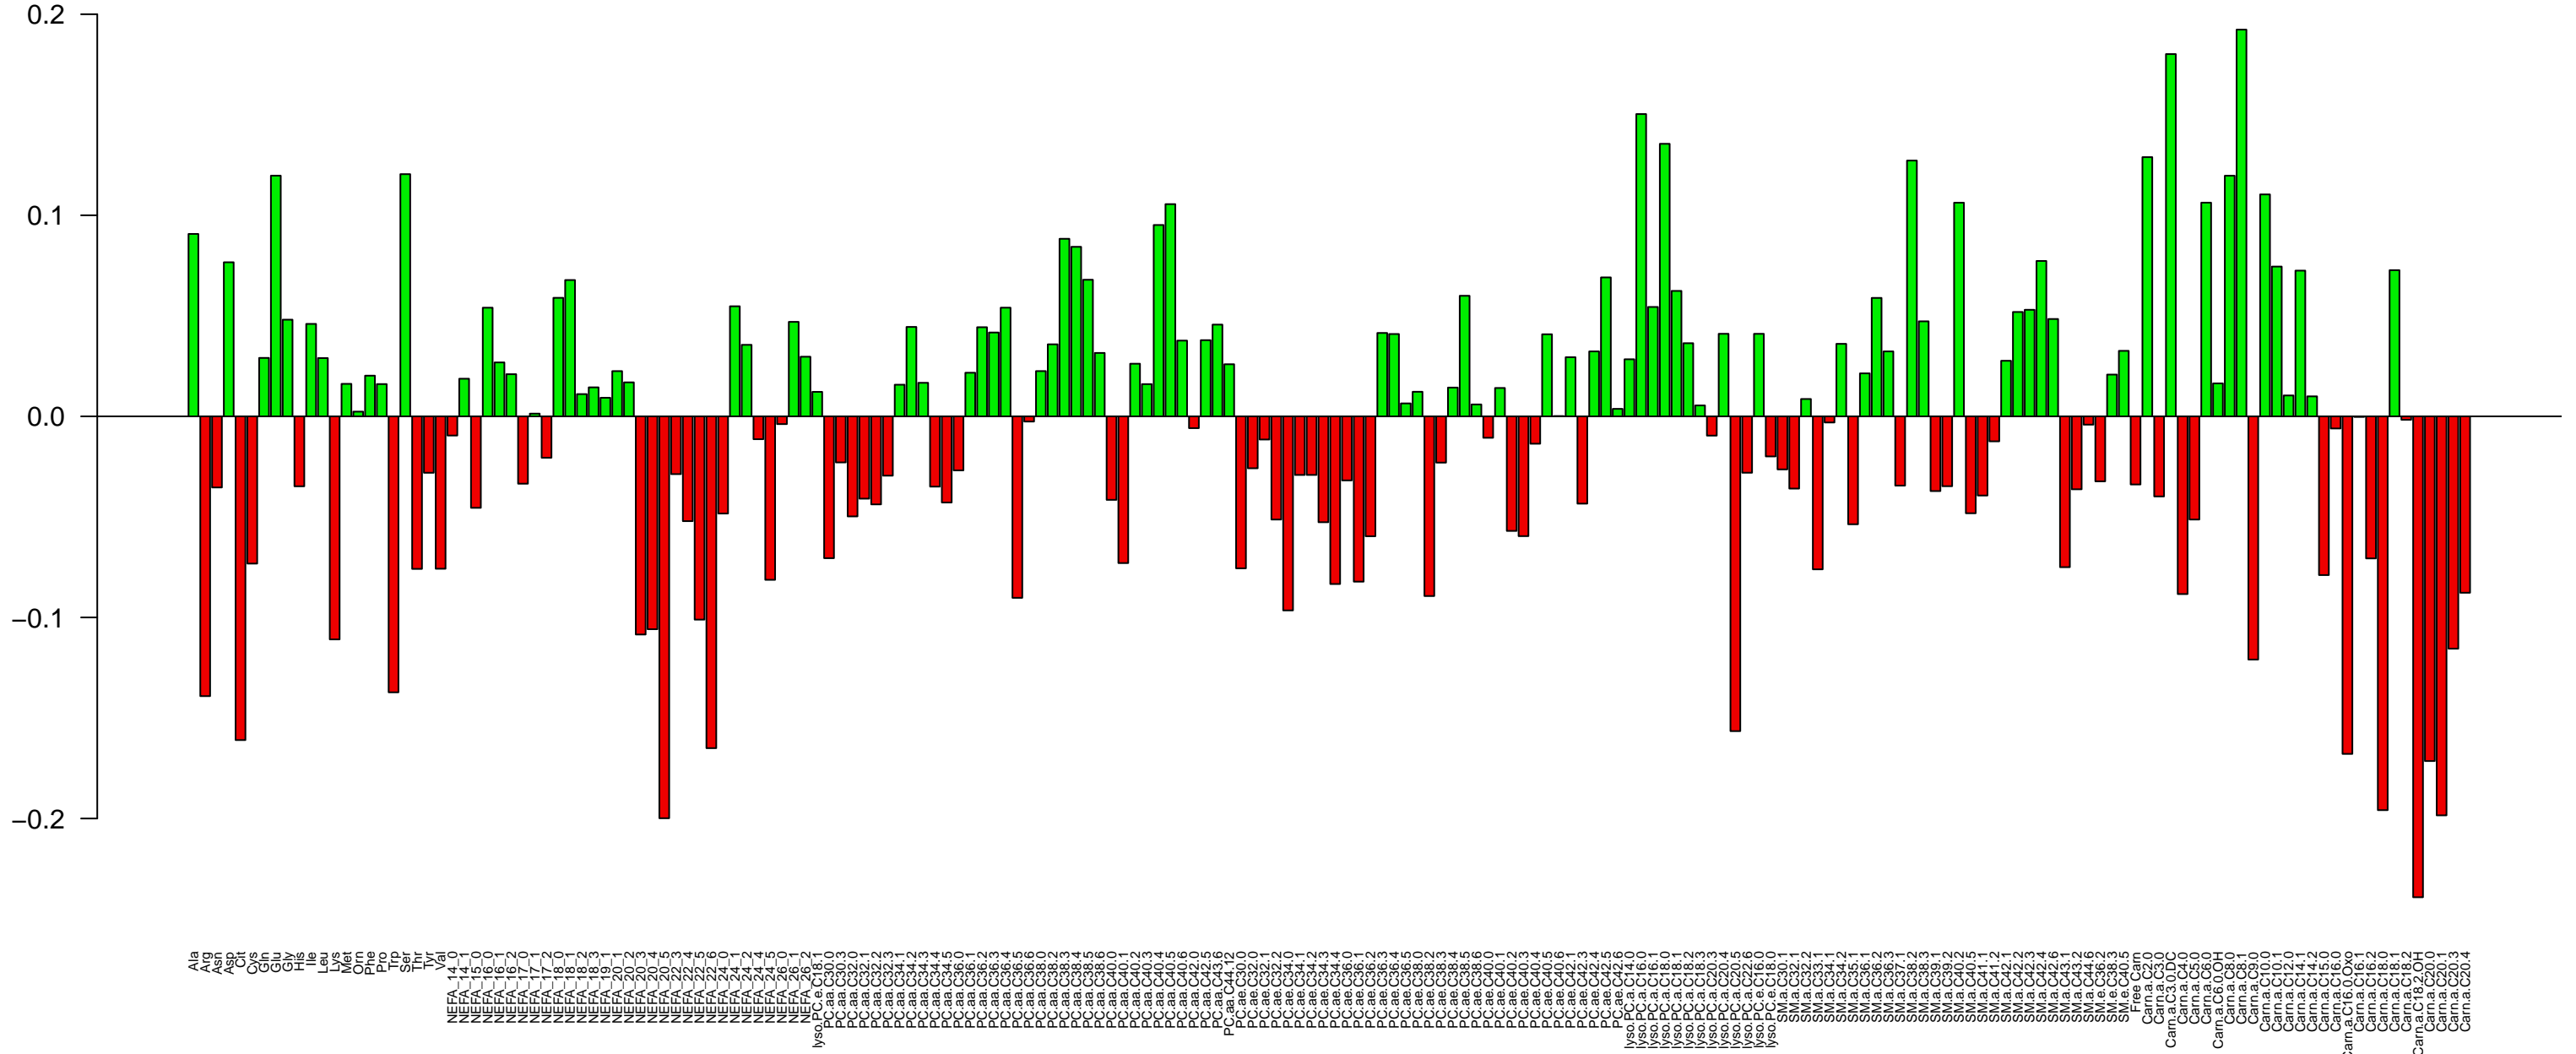



# Child at birth – PC 12 Loadings

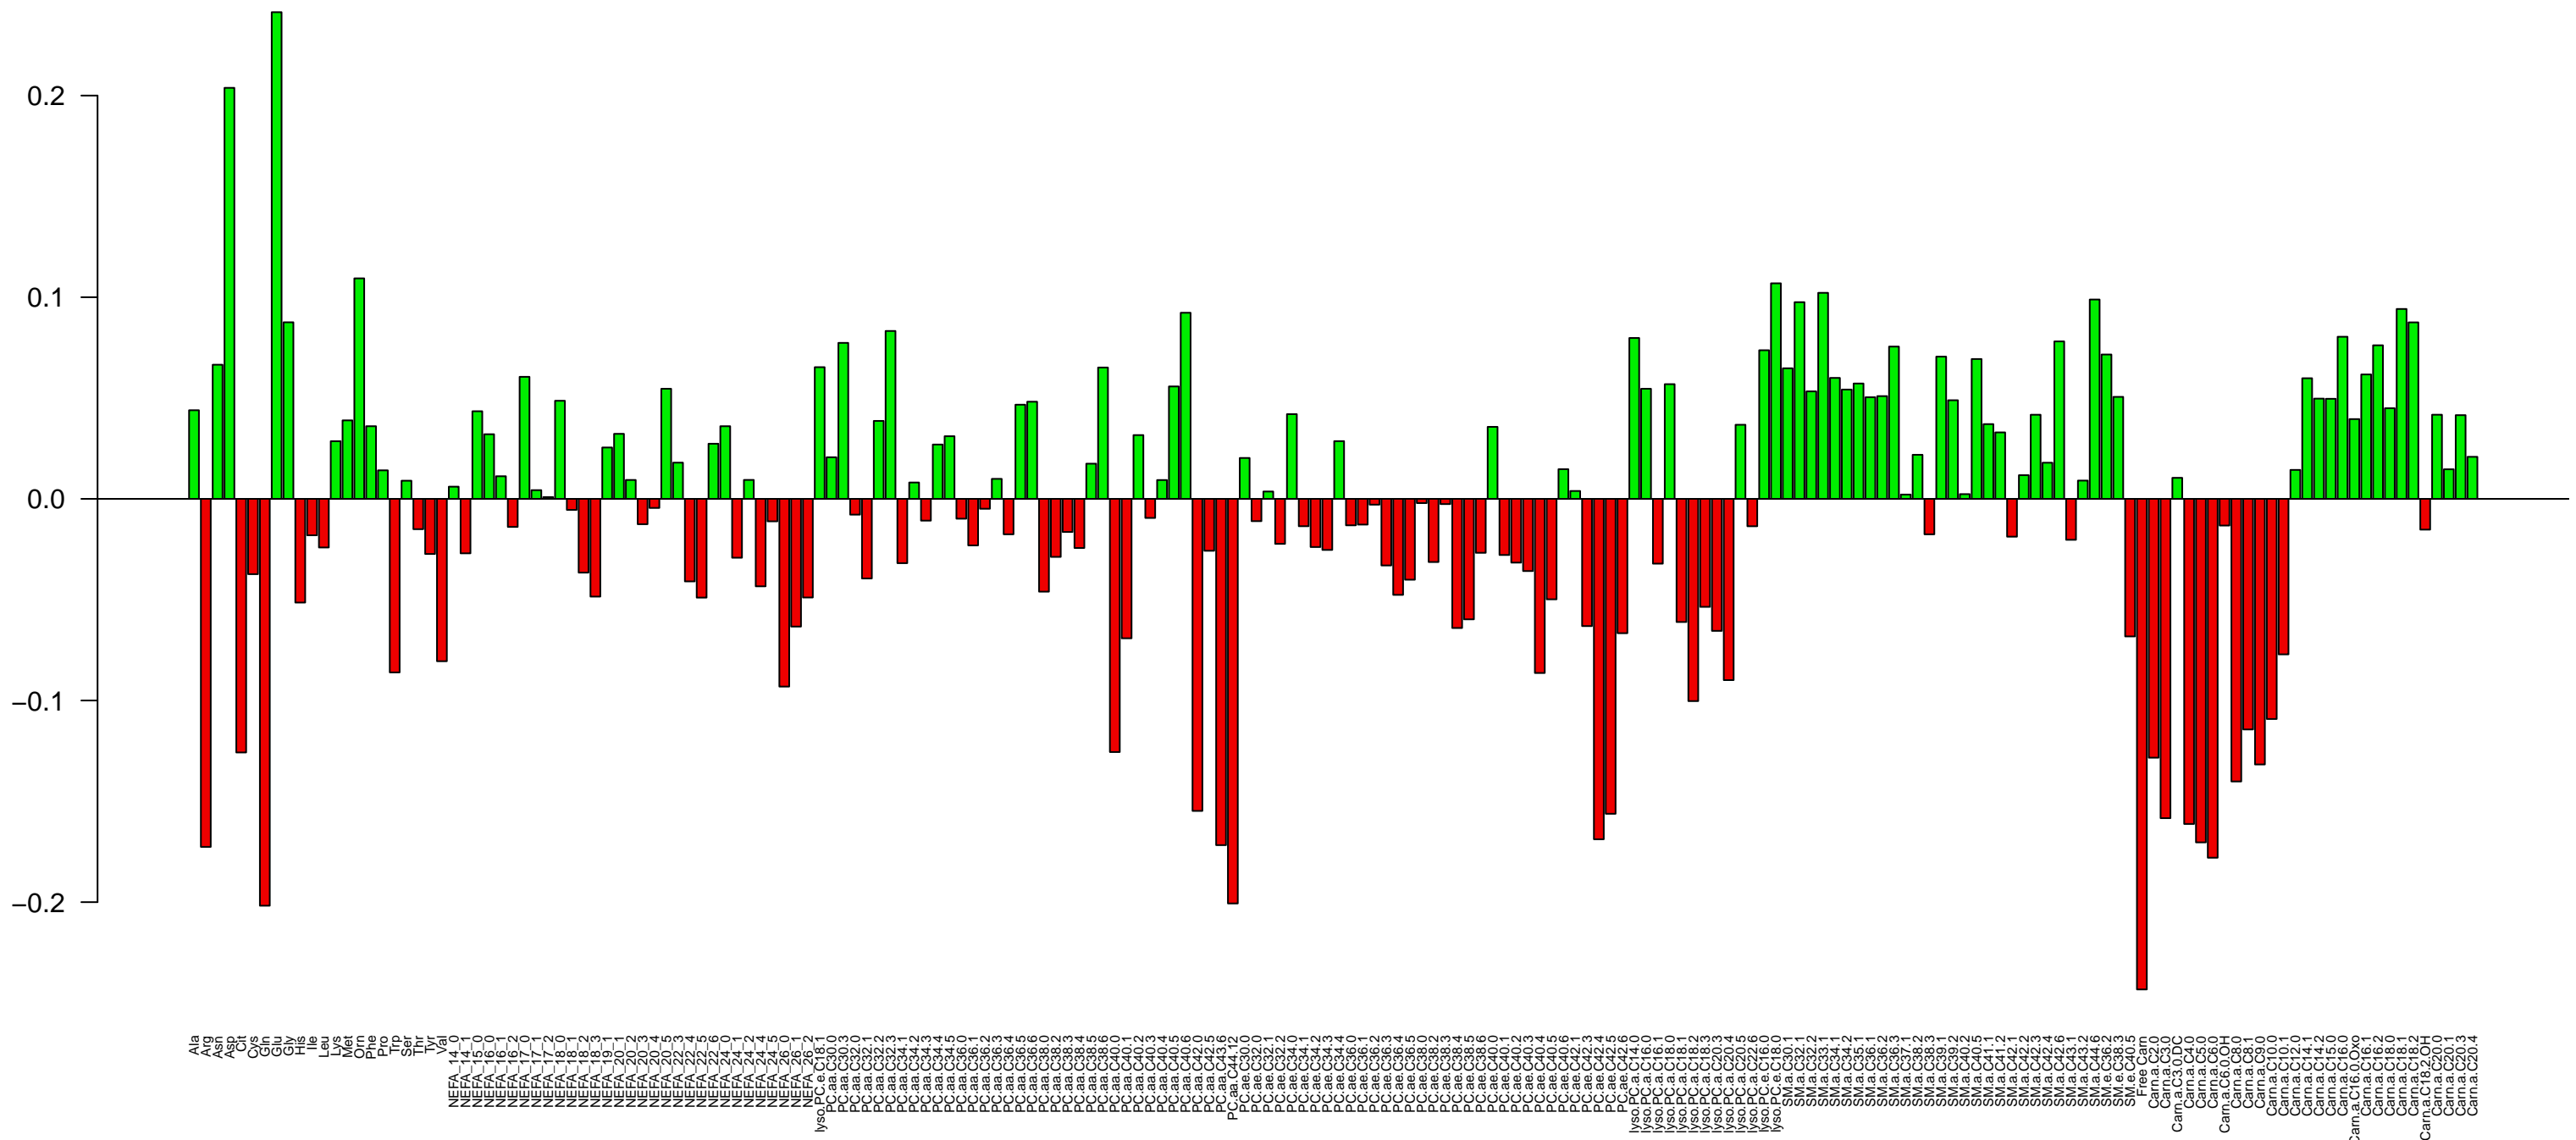

Child at birth – PC 13 Loadings

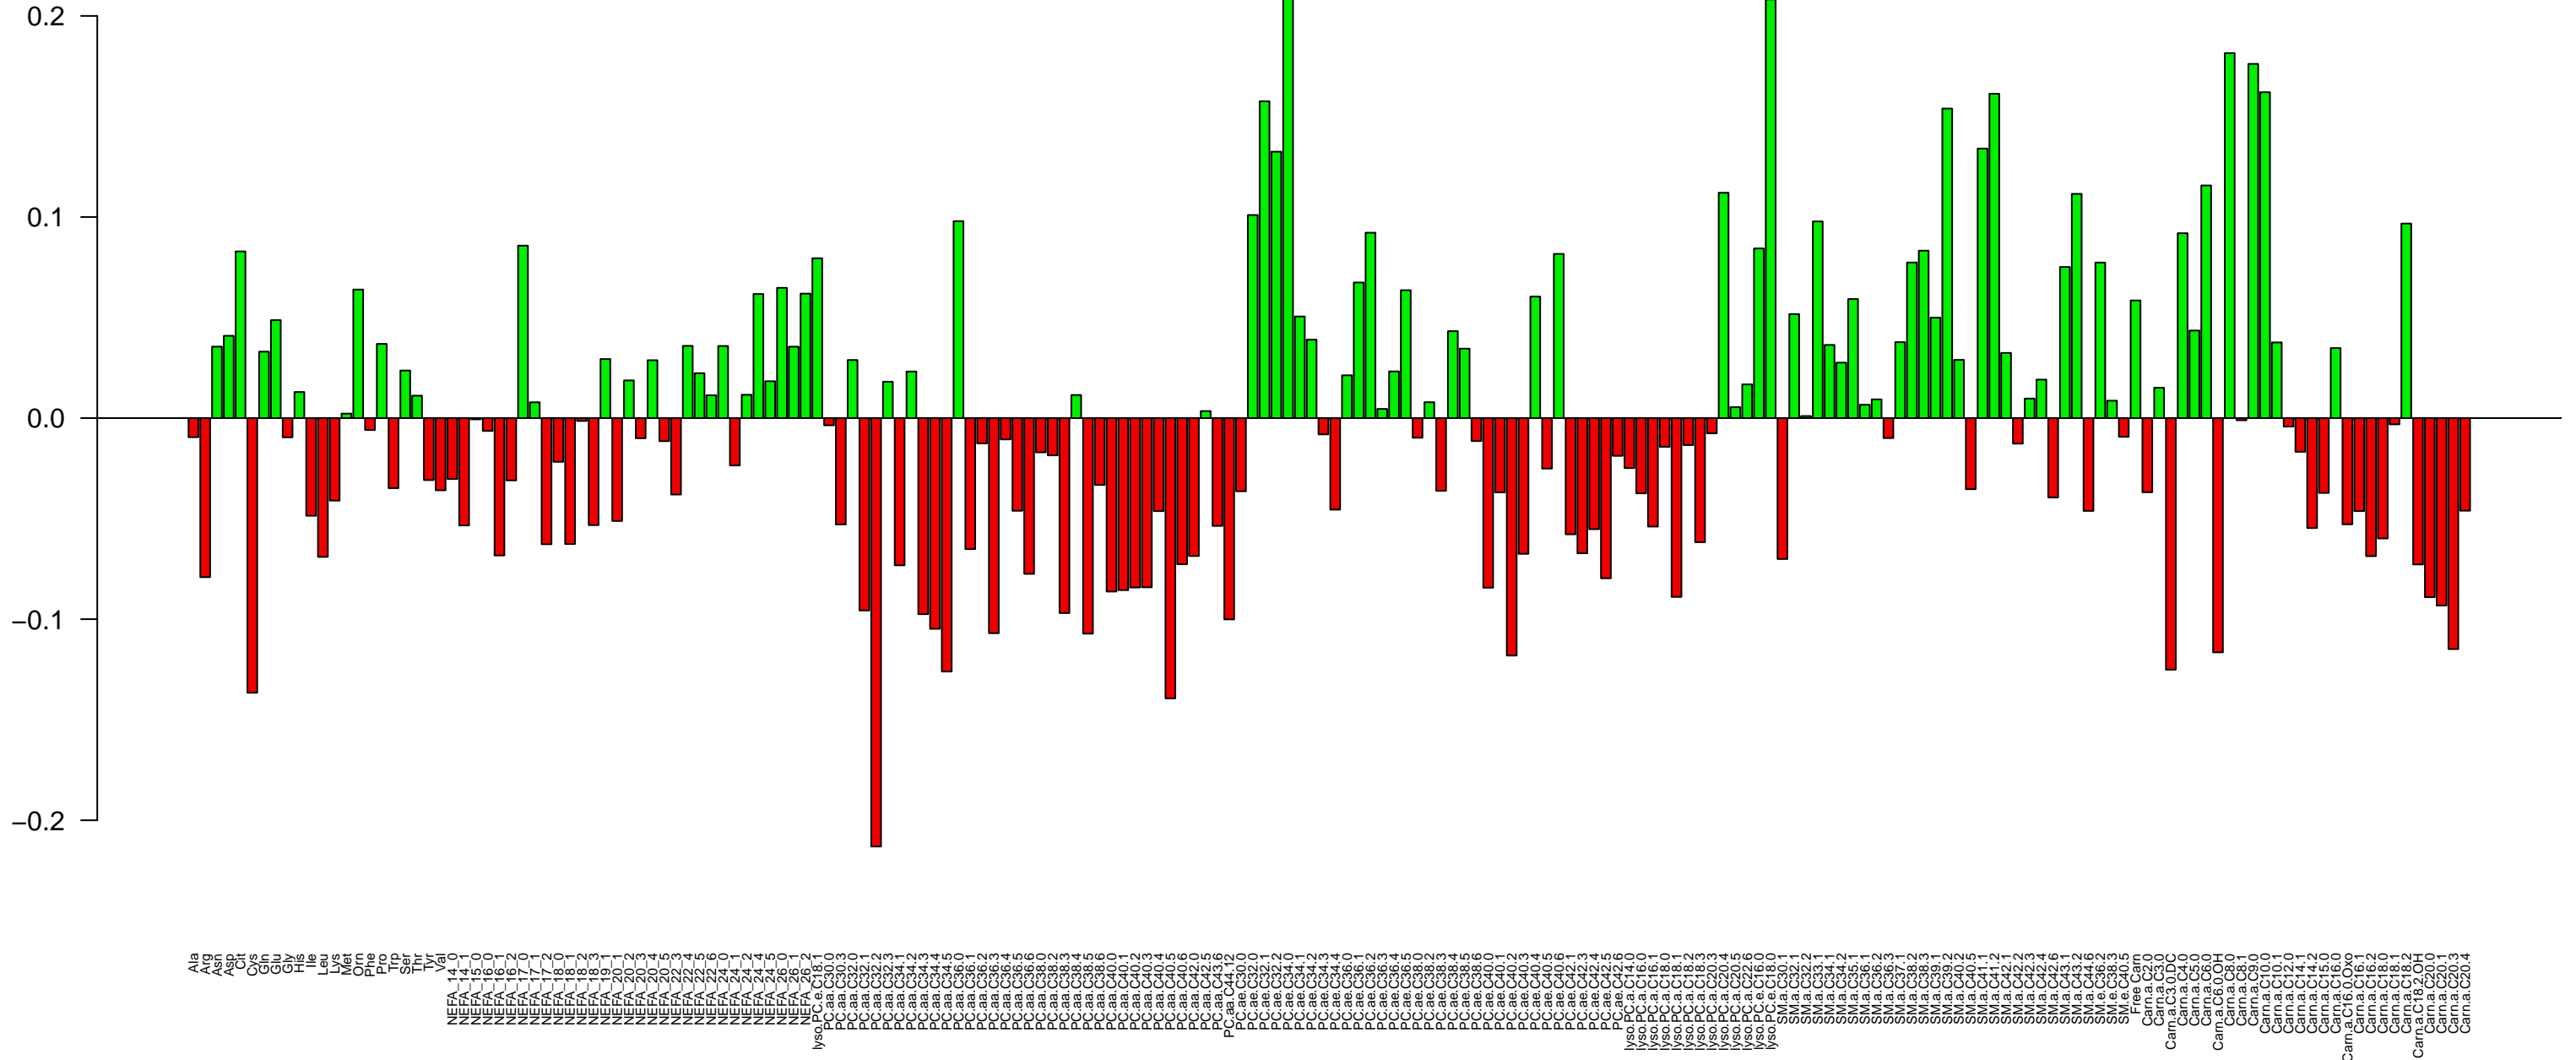

# Child at birth – PC 14 Loadings

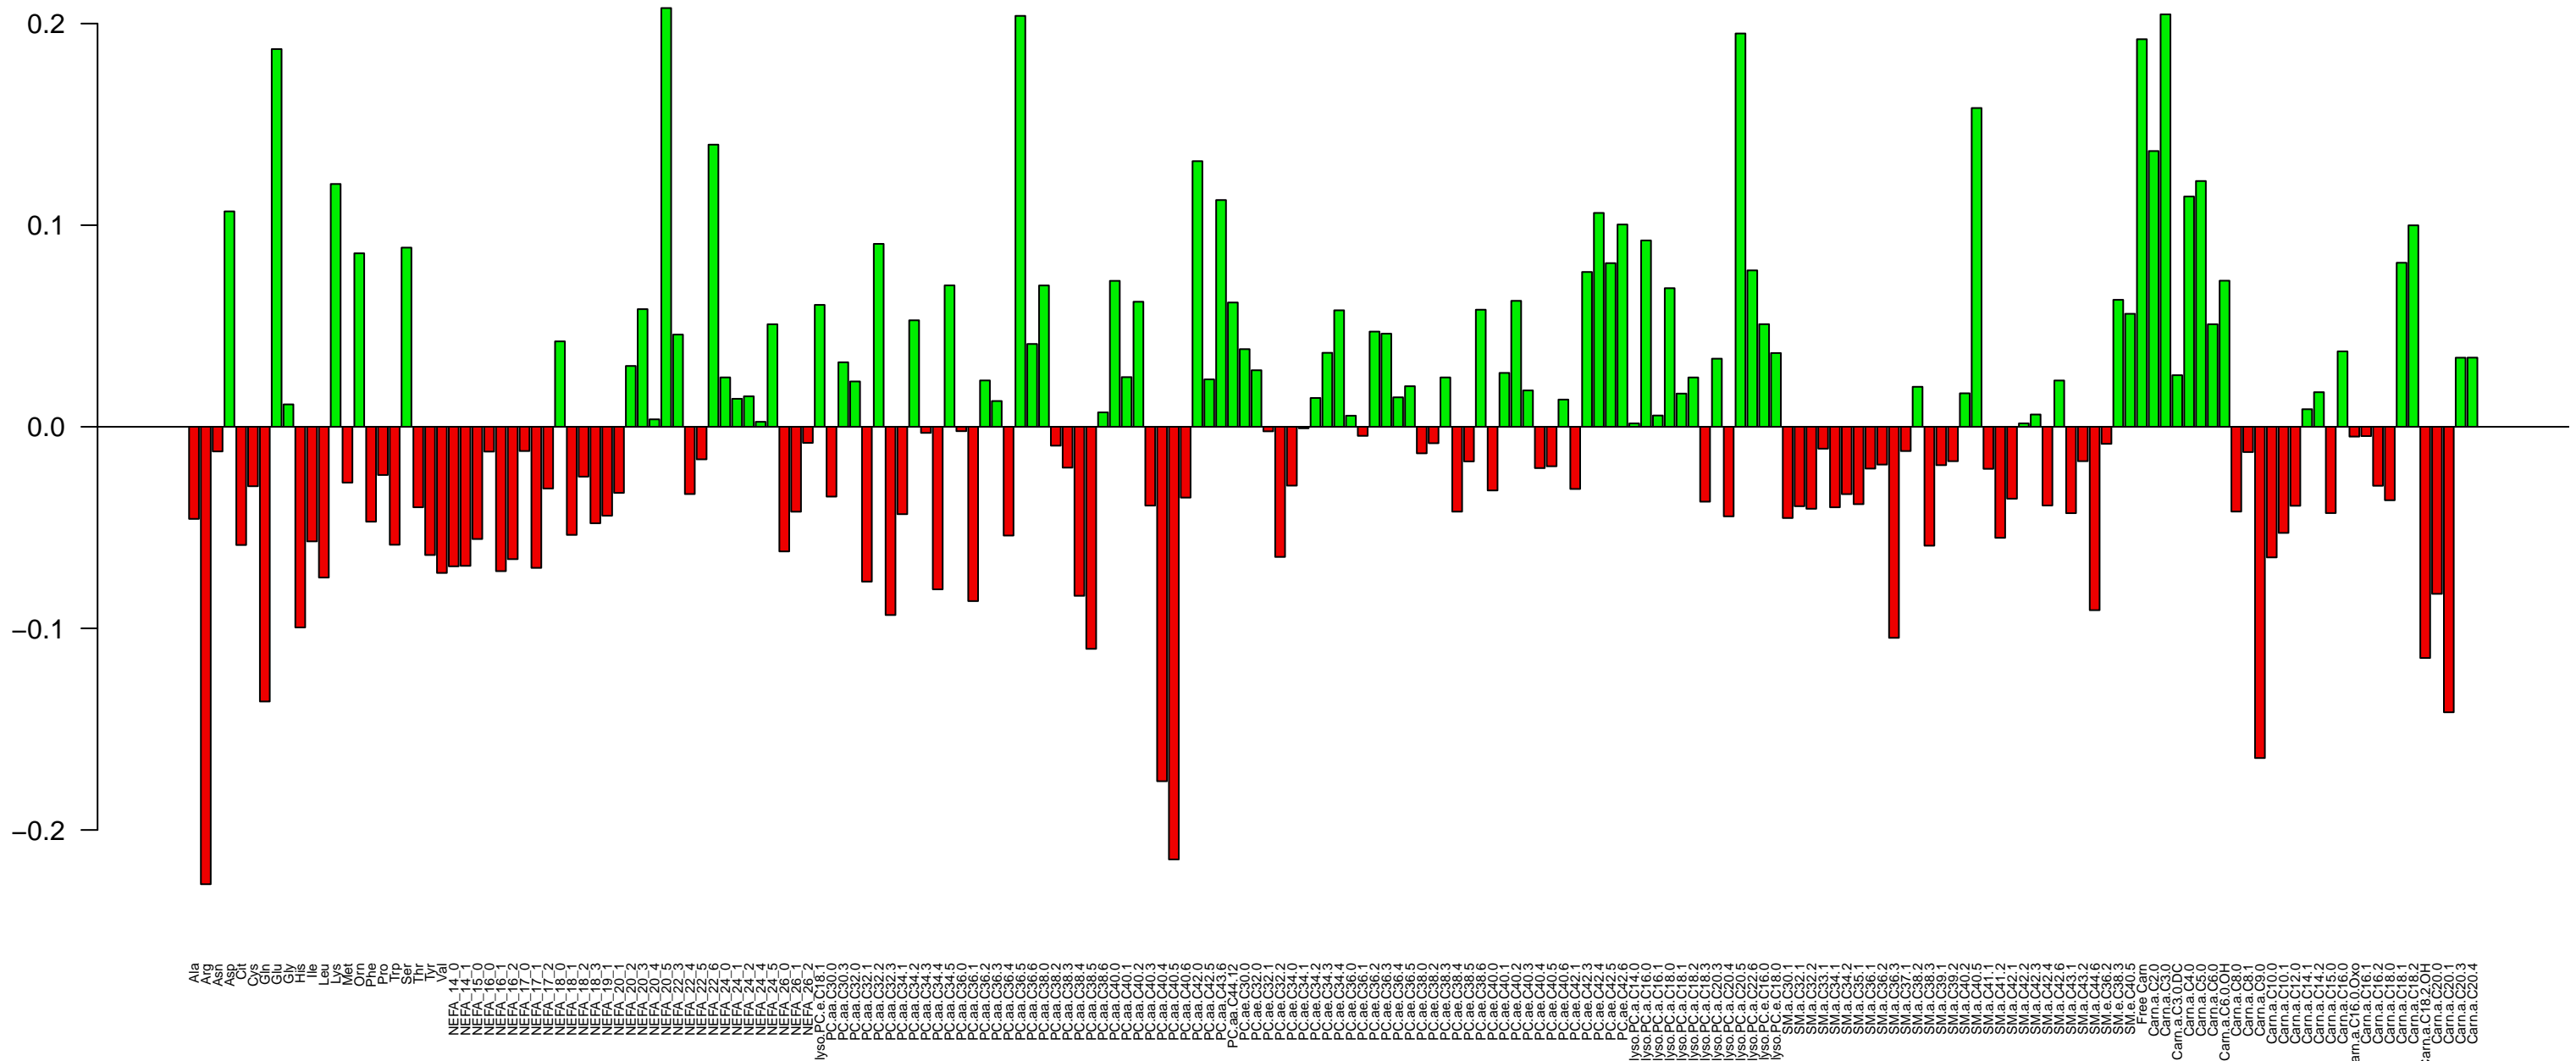

# Child at birth – PC 15 Loadings

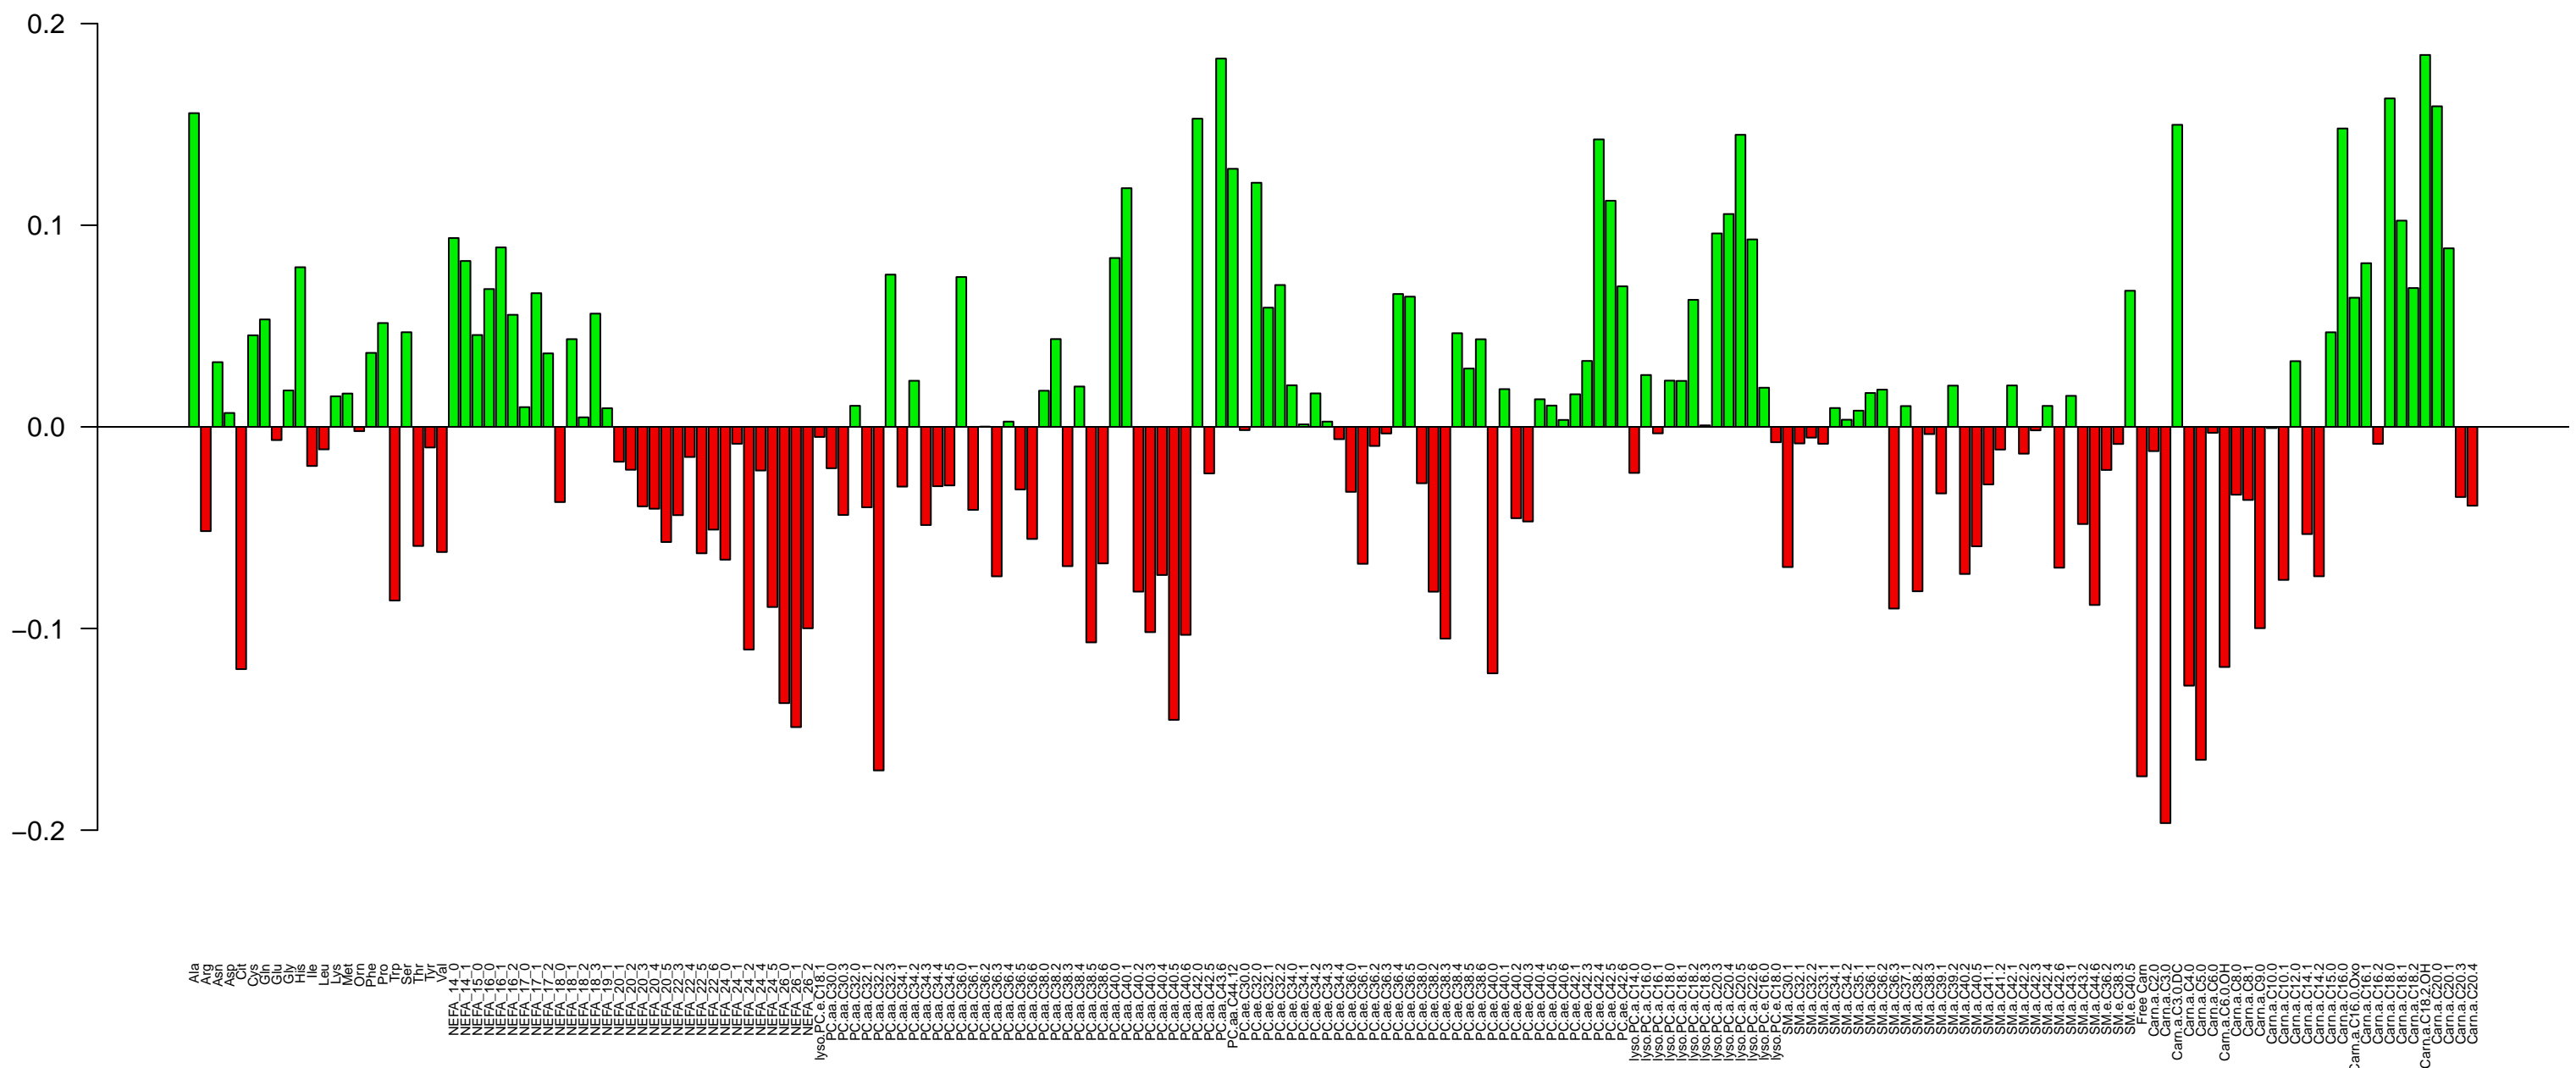

Child at birth – PC 16 Loadings

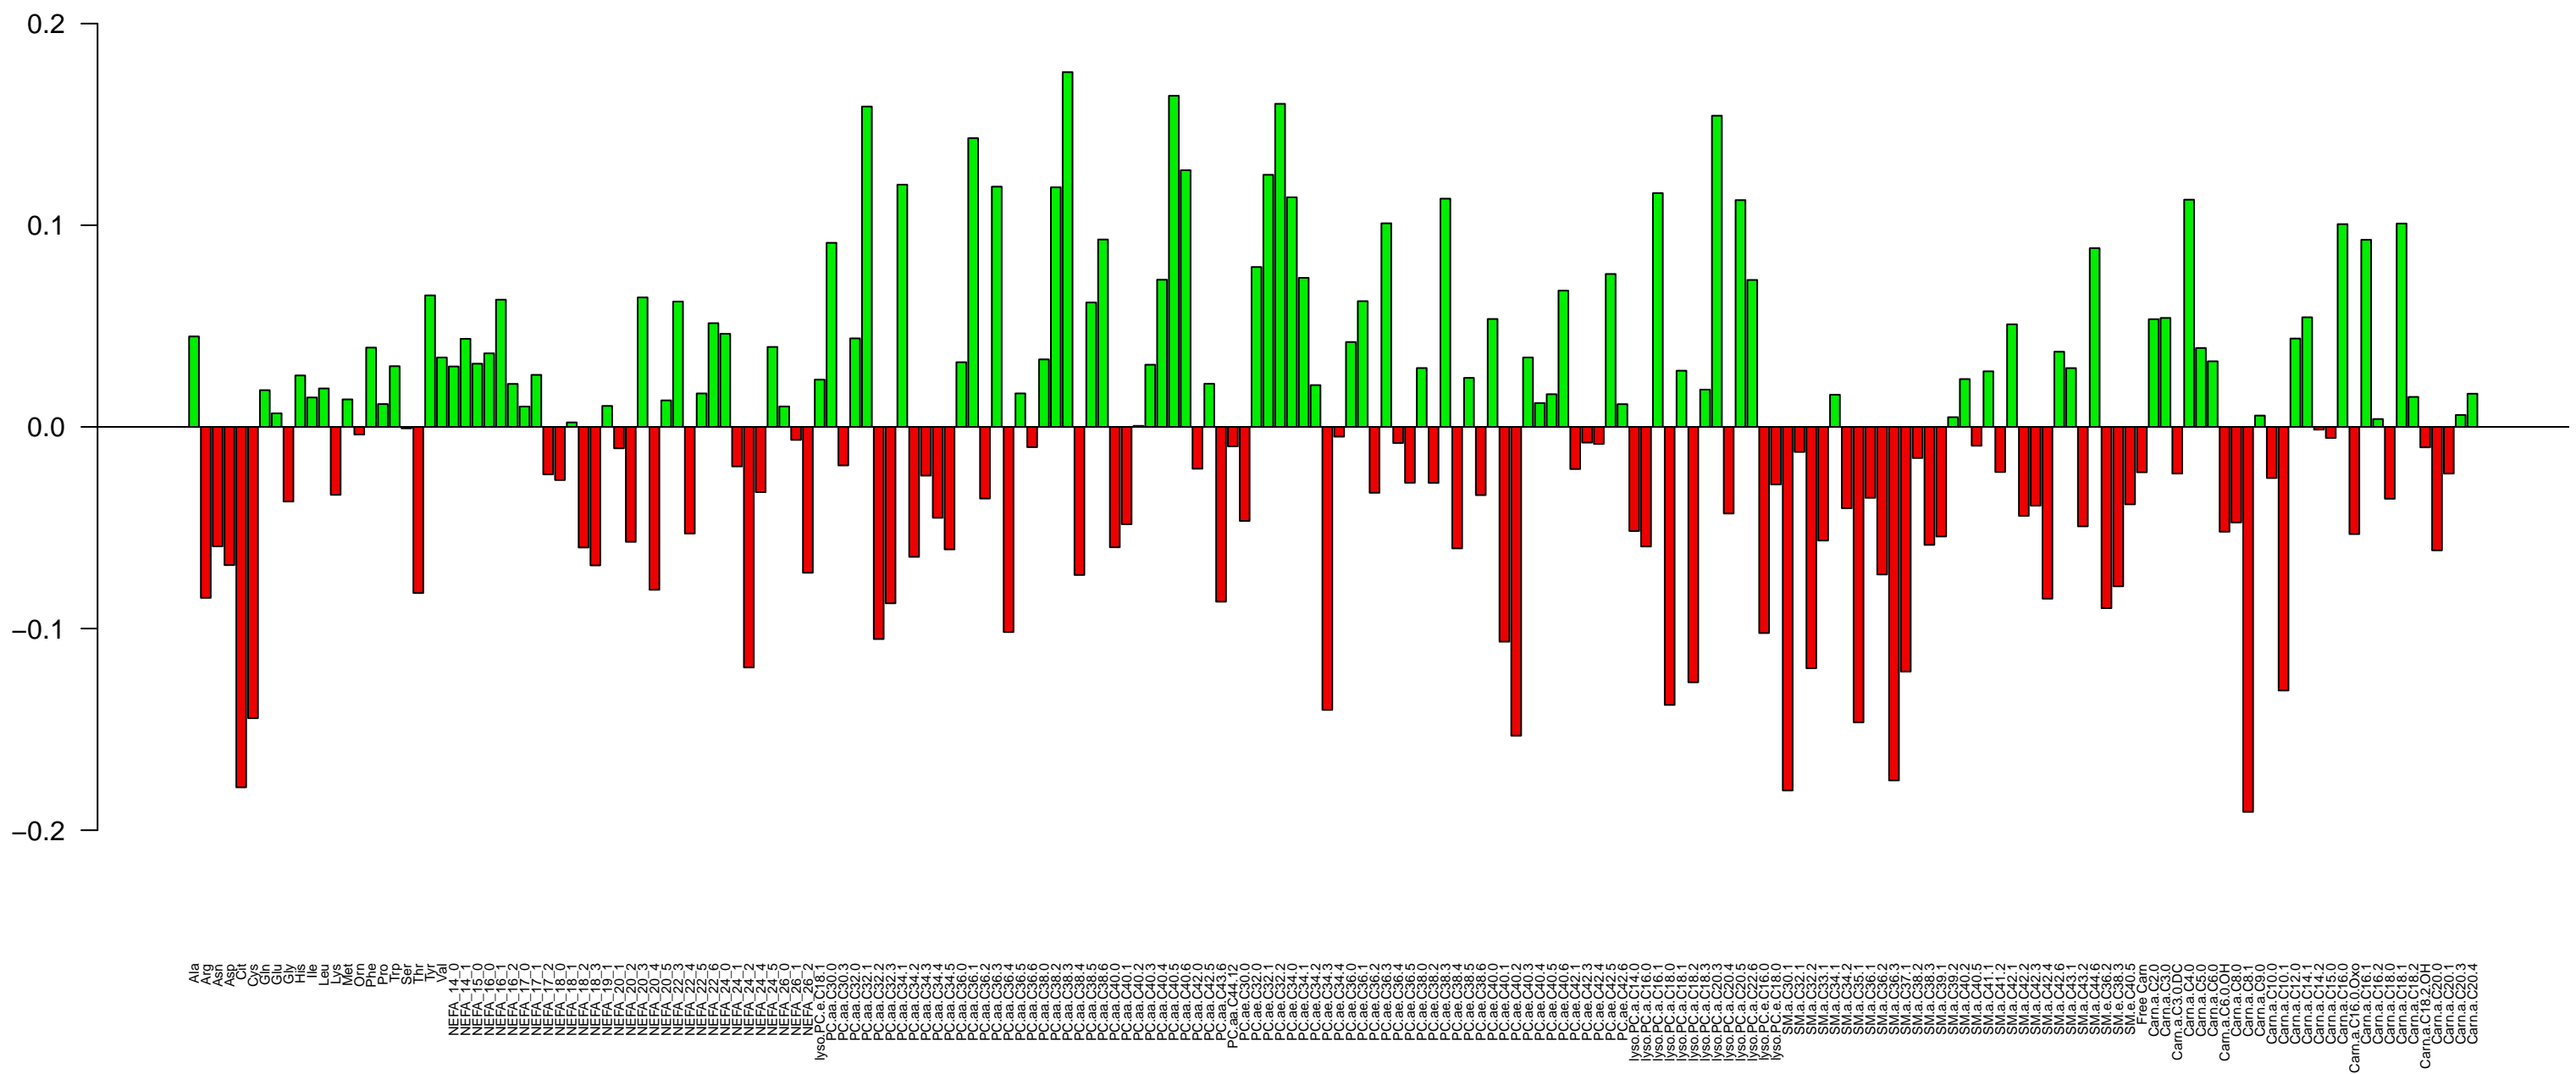



# Child at birth – PC 17 Loadings

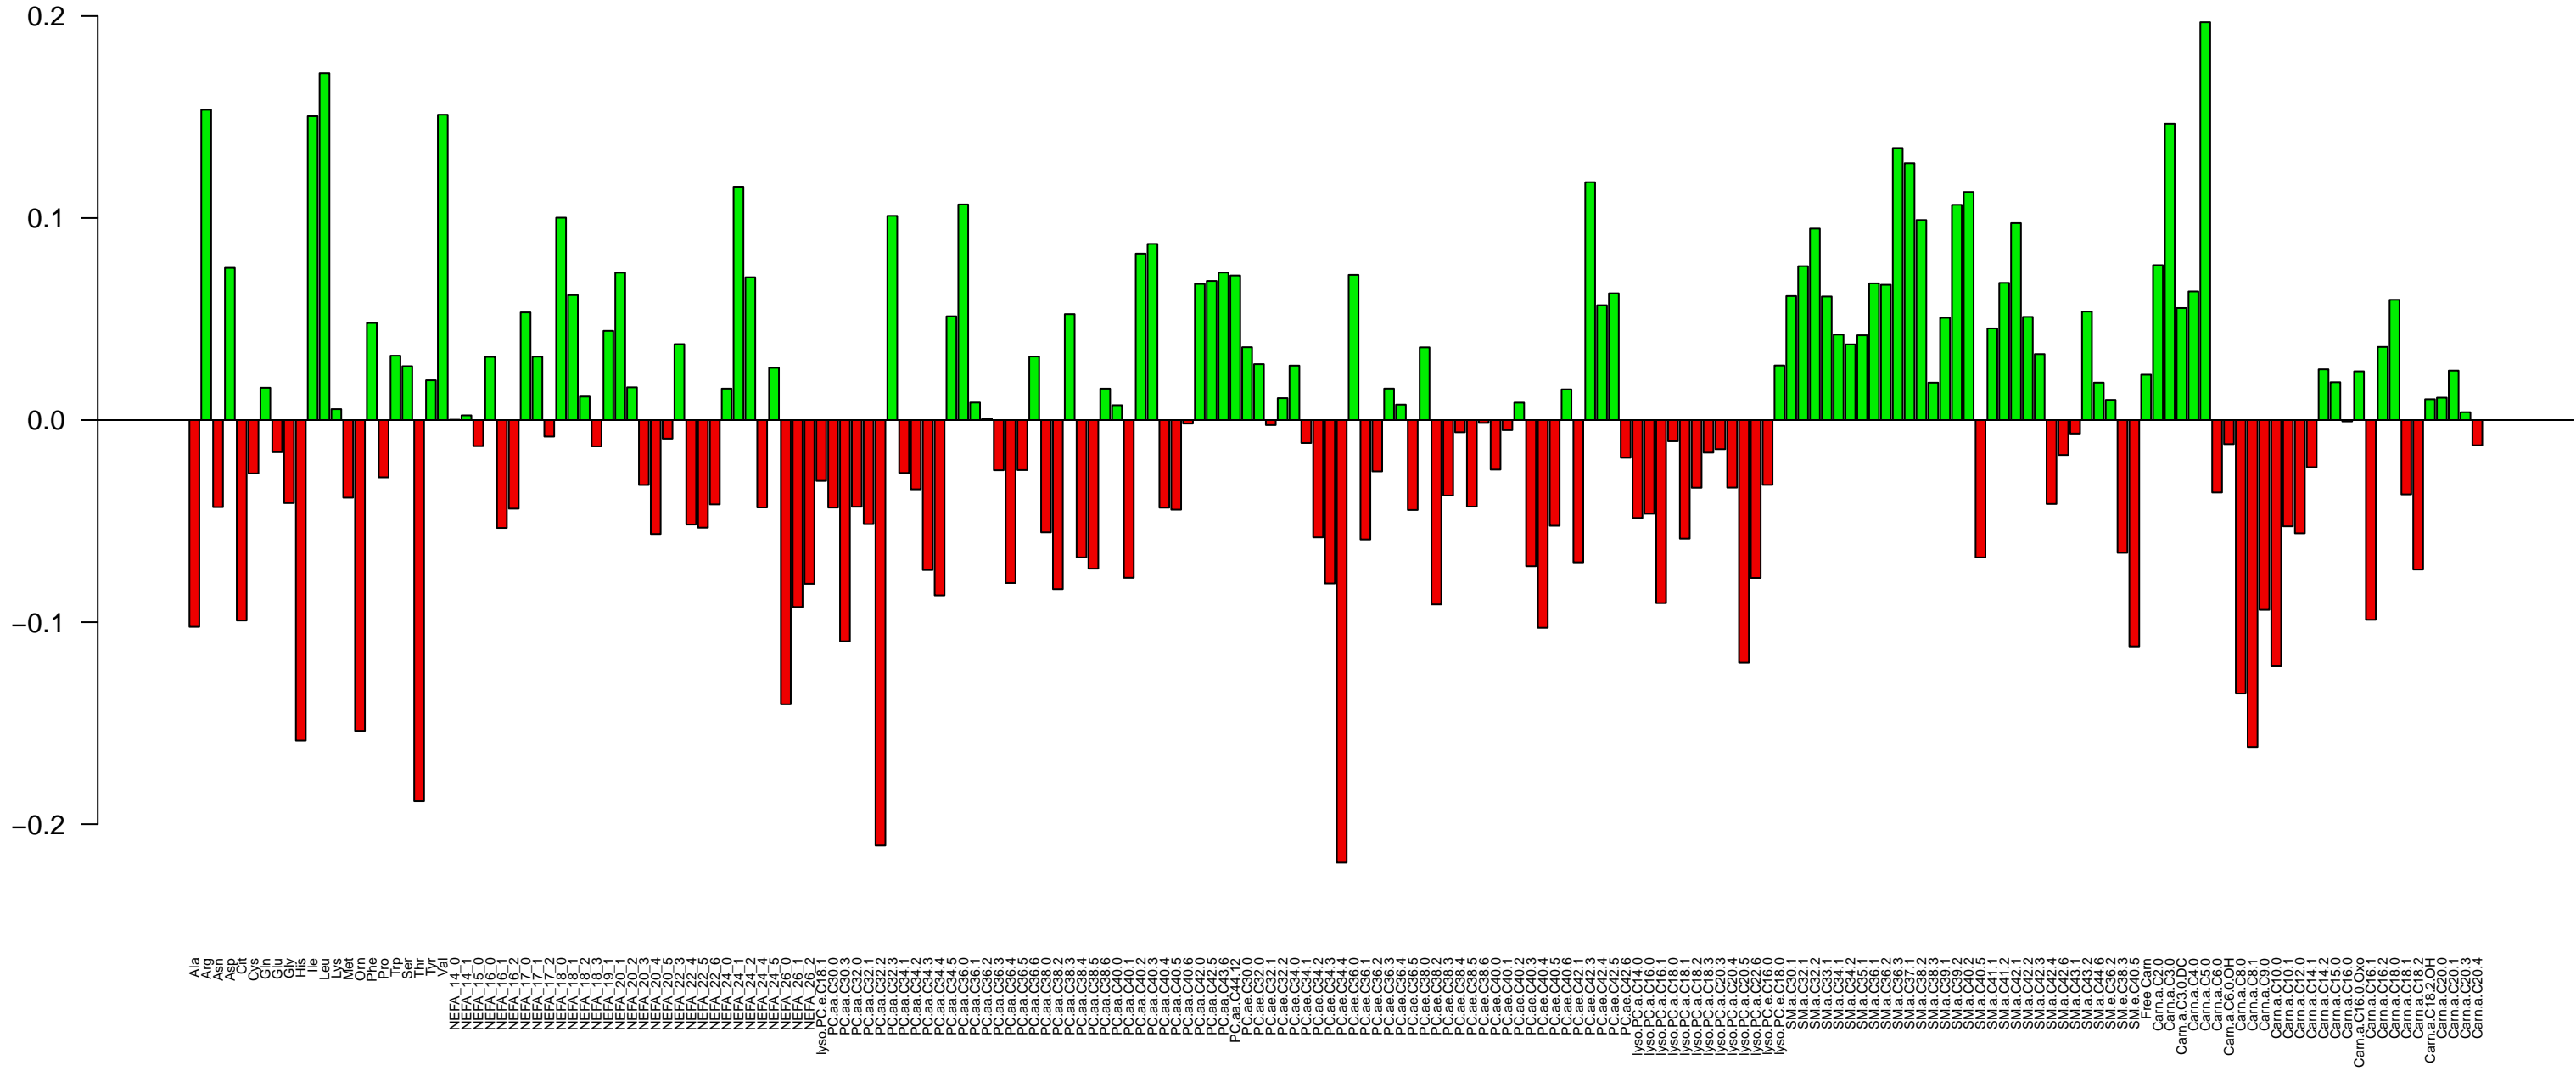









# Child at birth – PC 22 Loadings

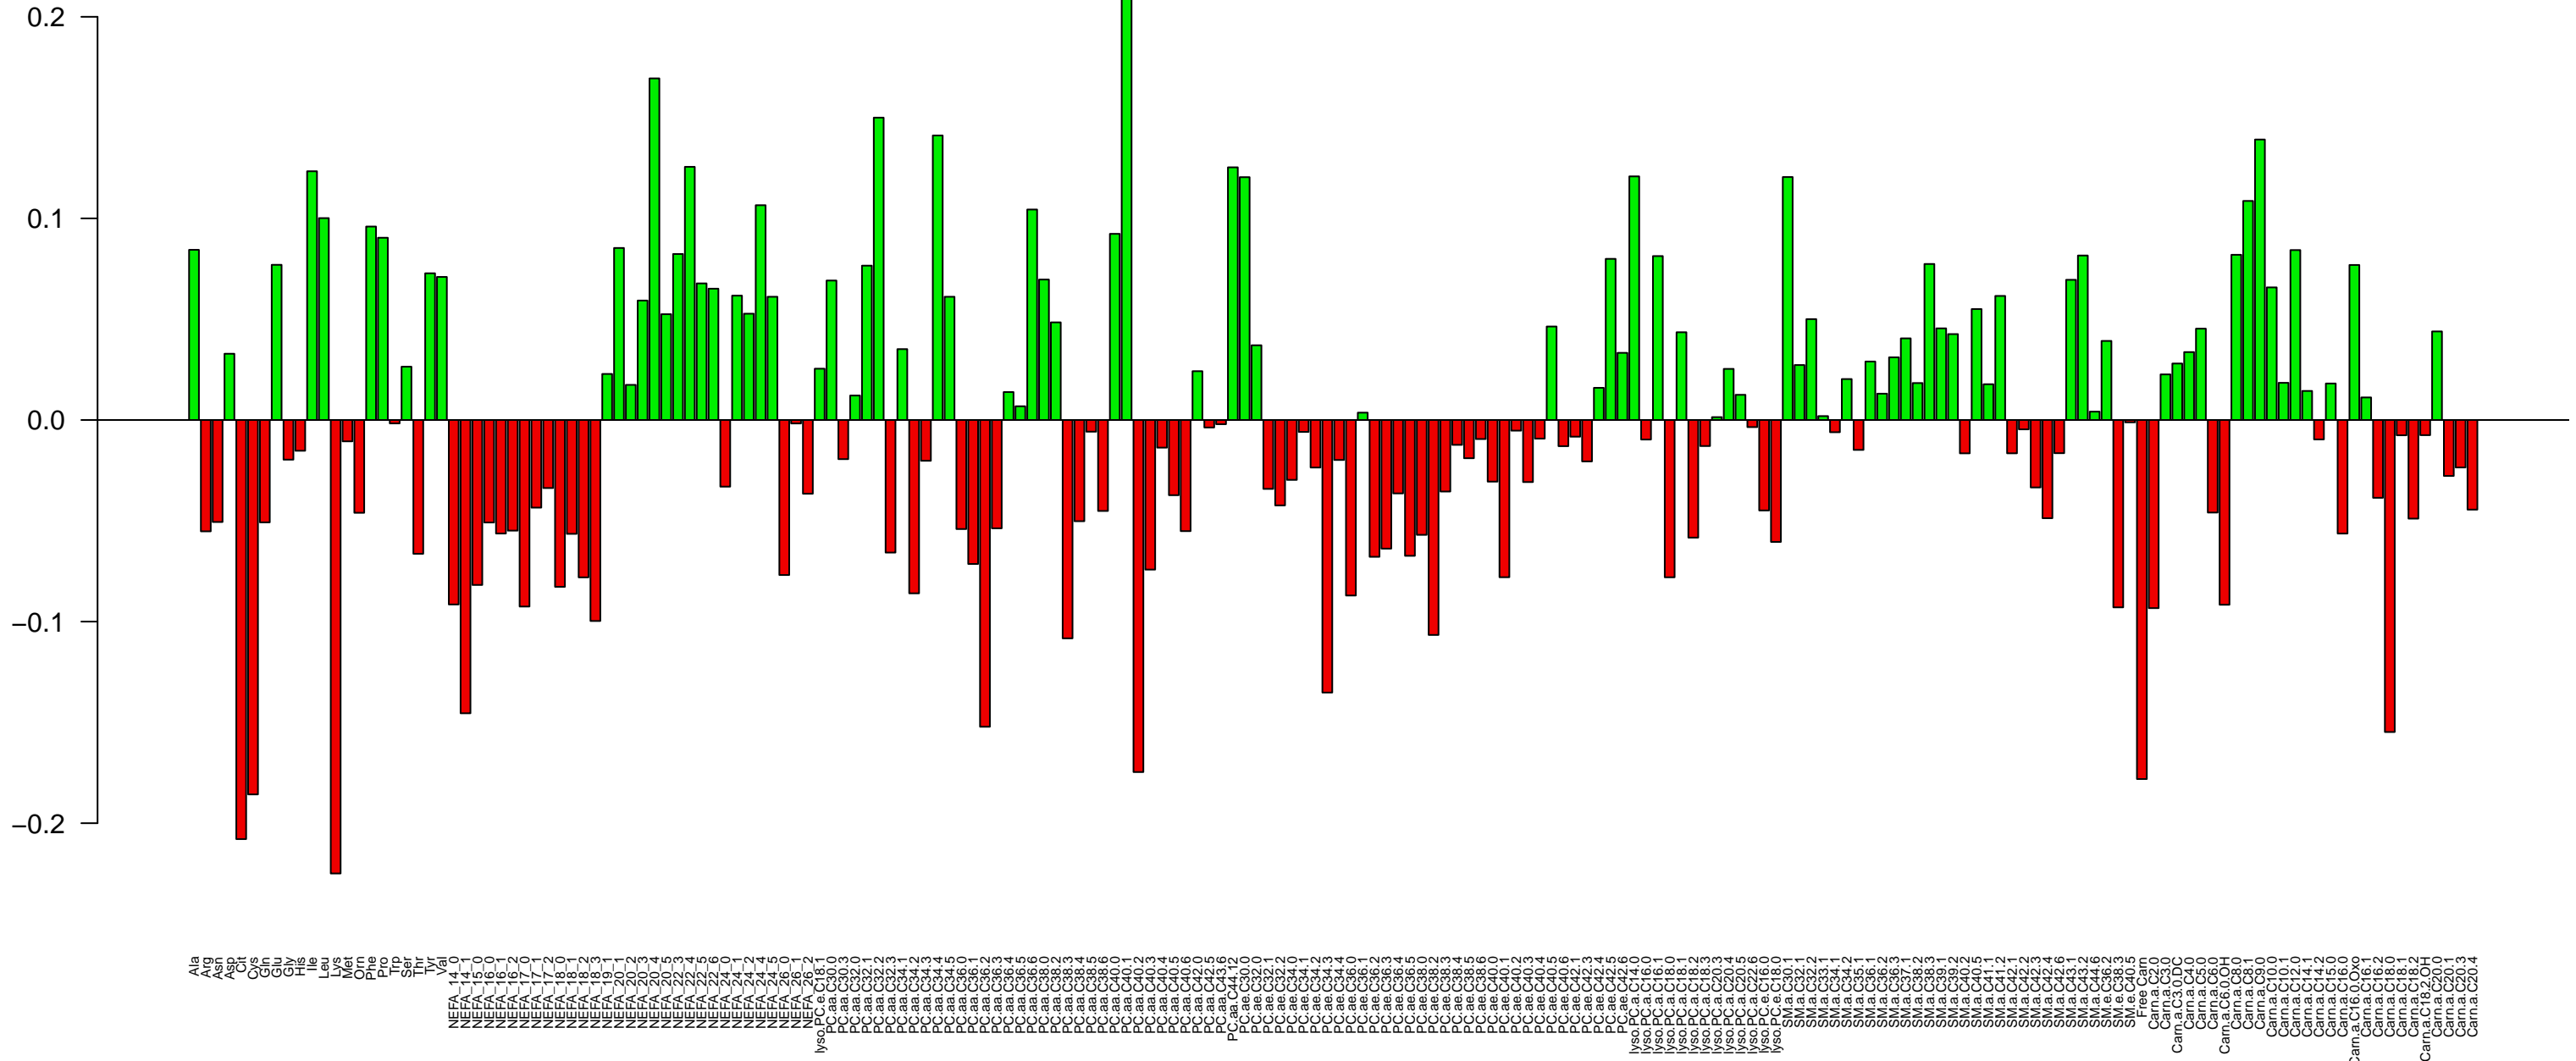

### Child at birth – PC 23 Loadings

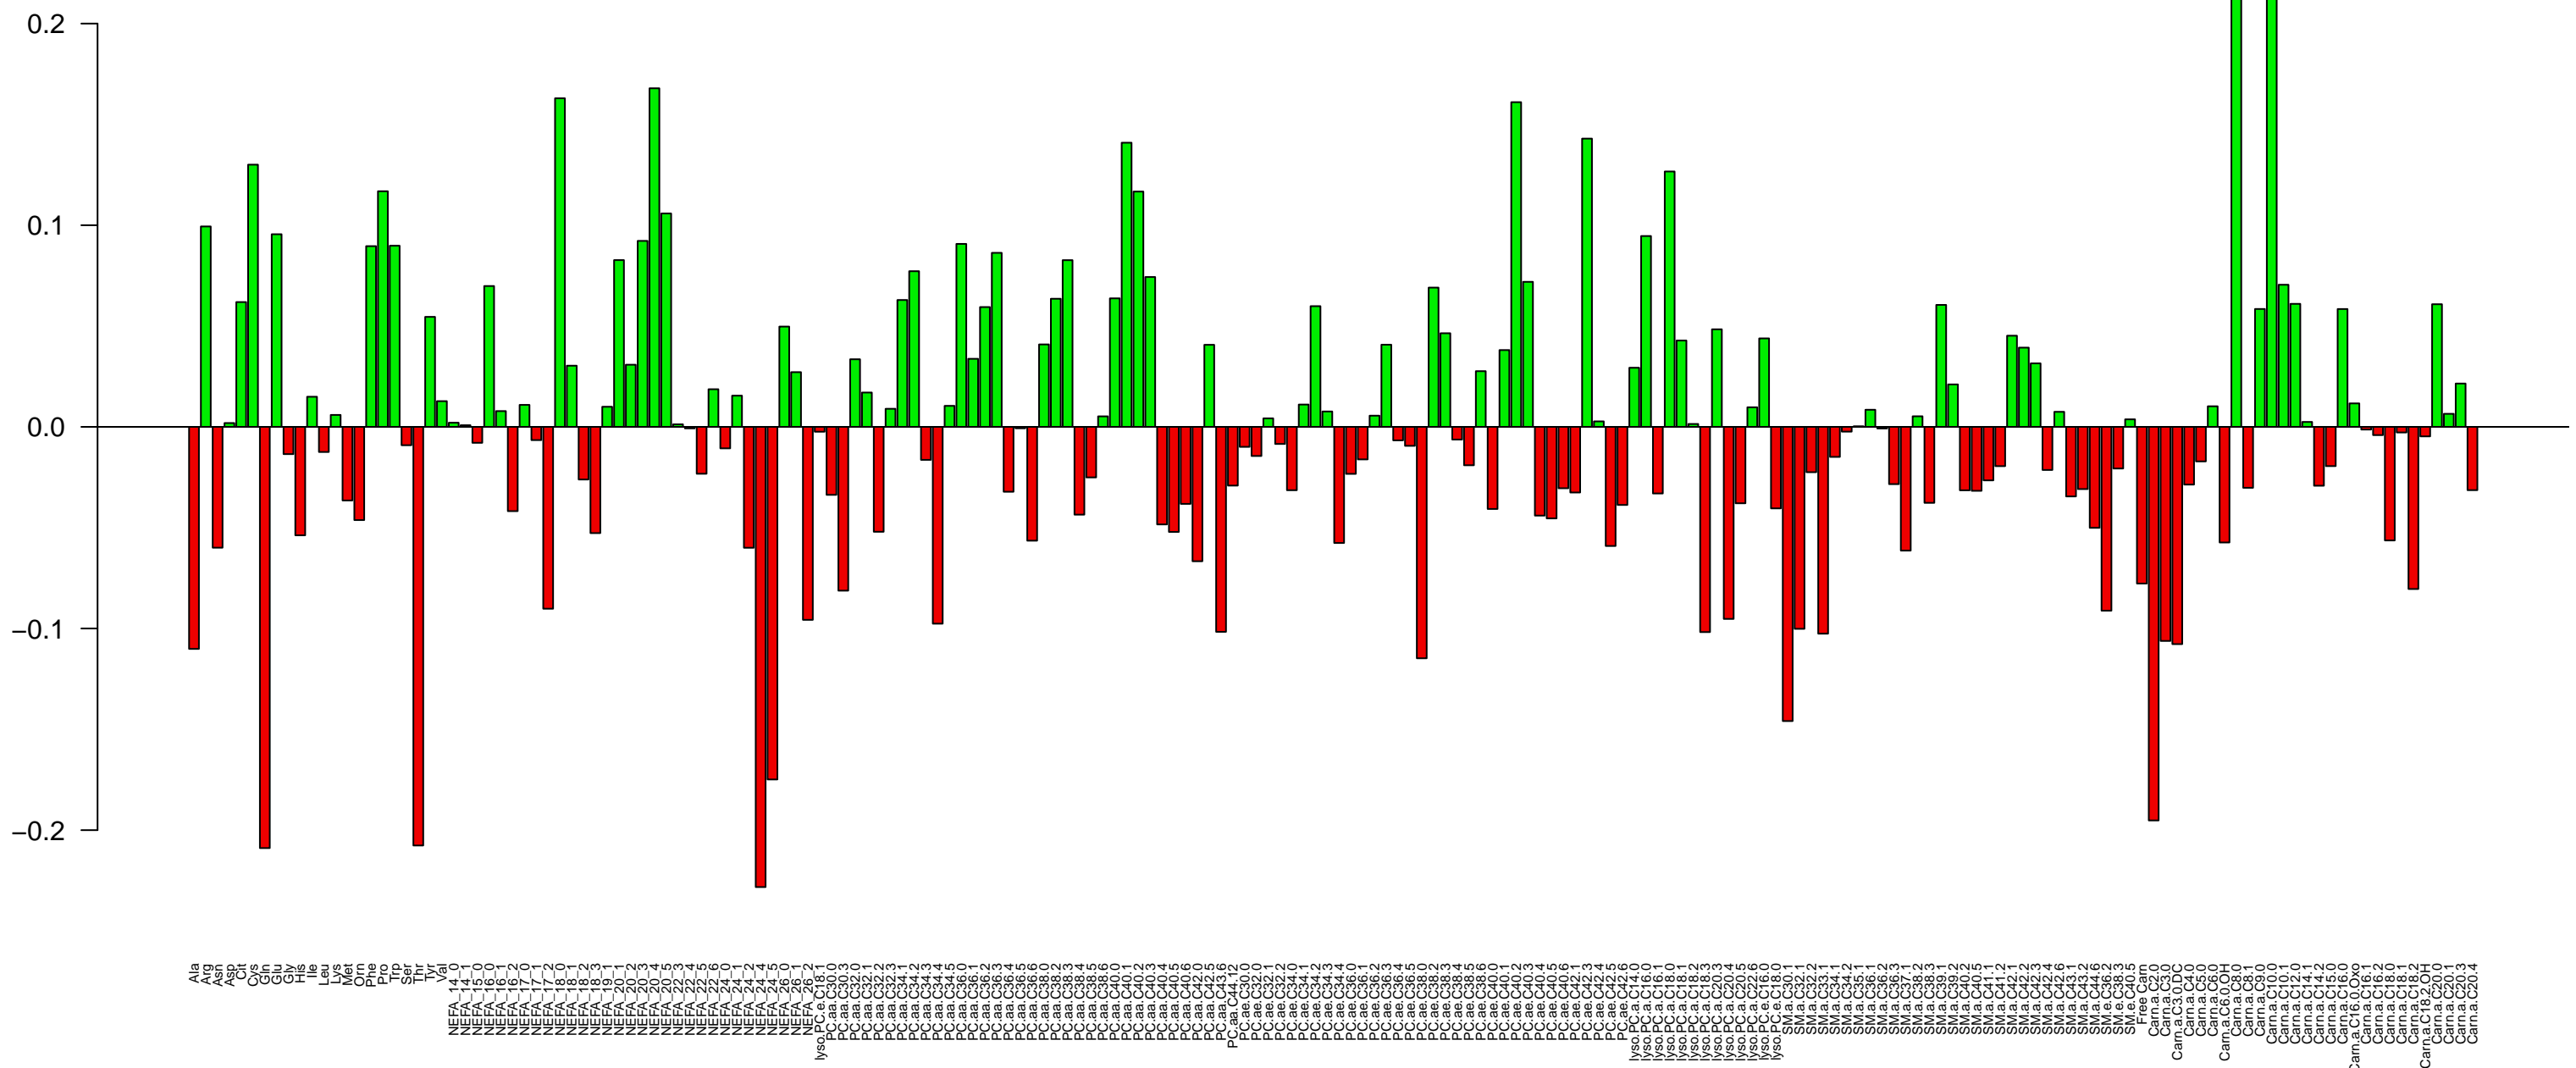





### Child at birth – PC 25 Loadings

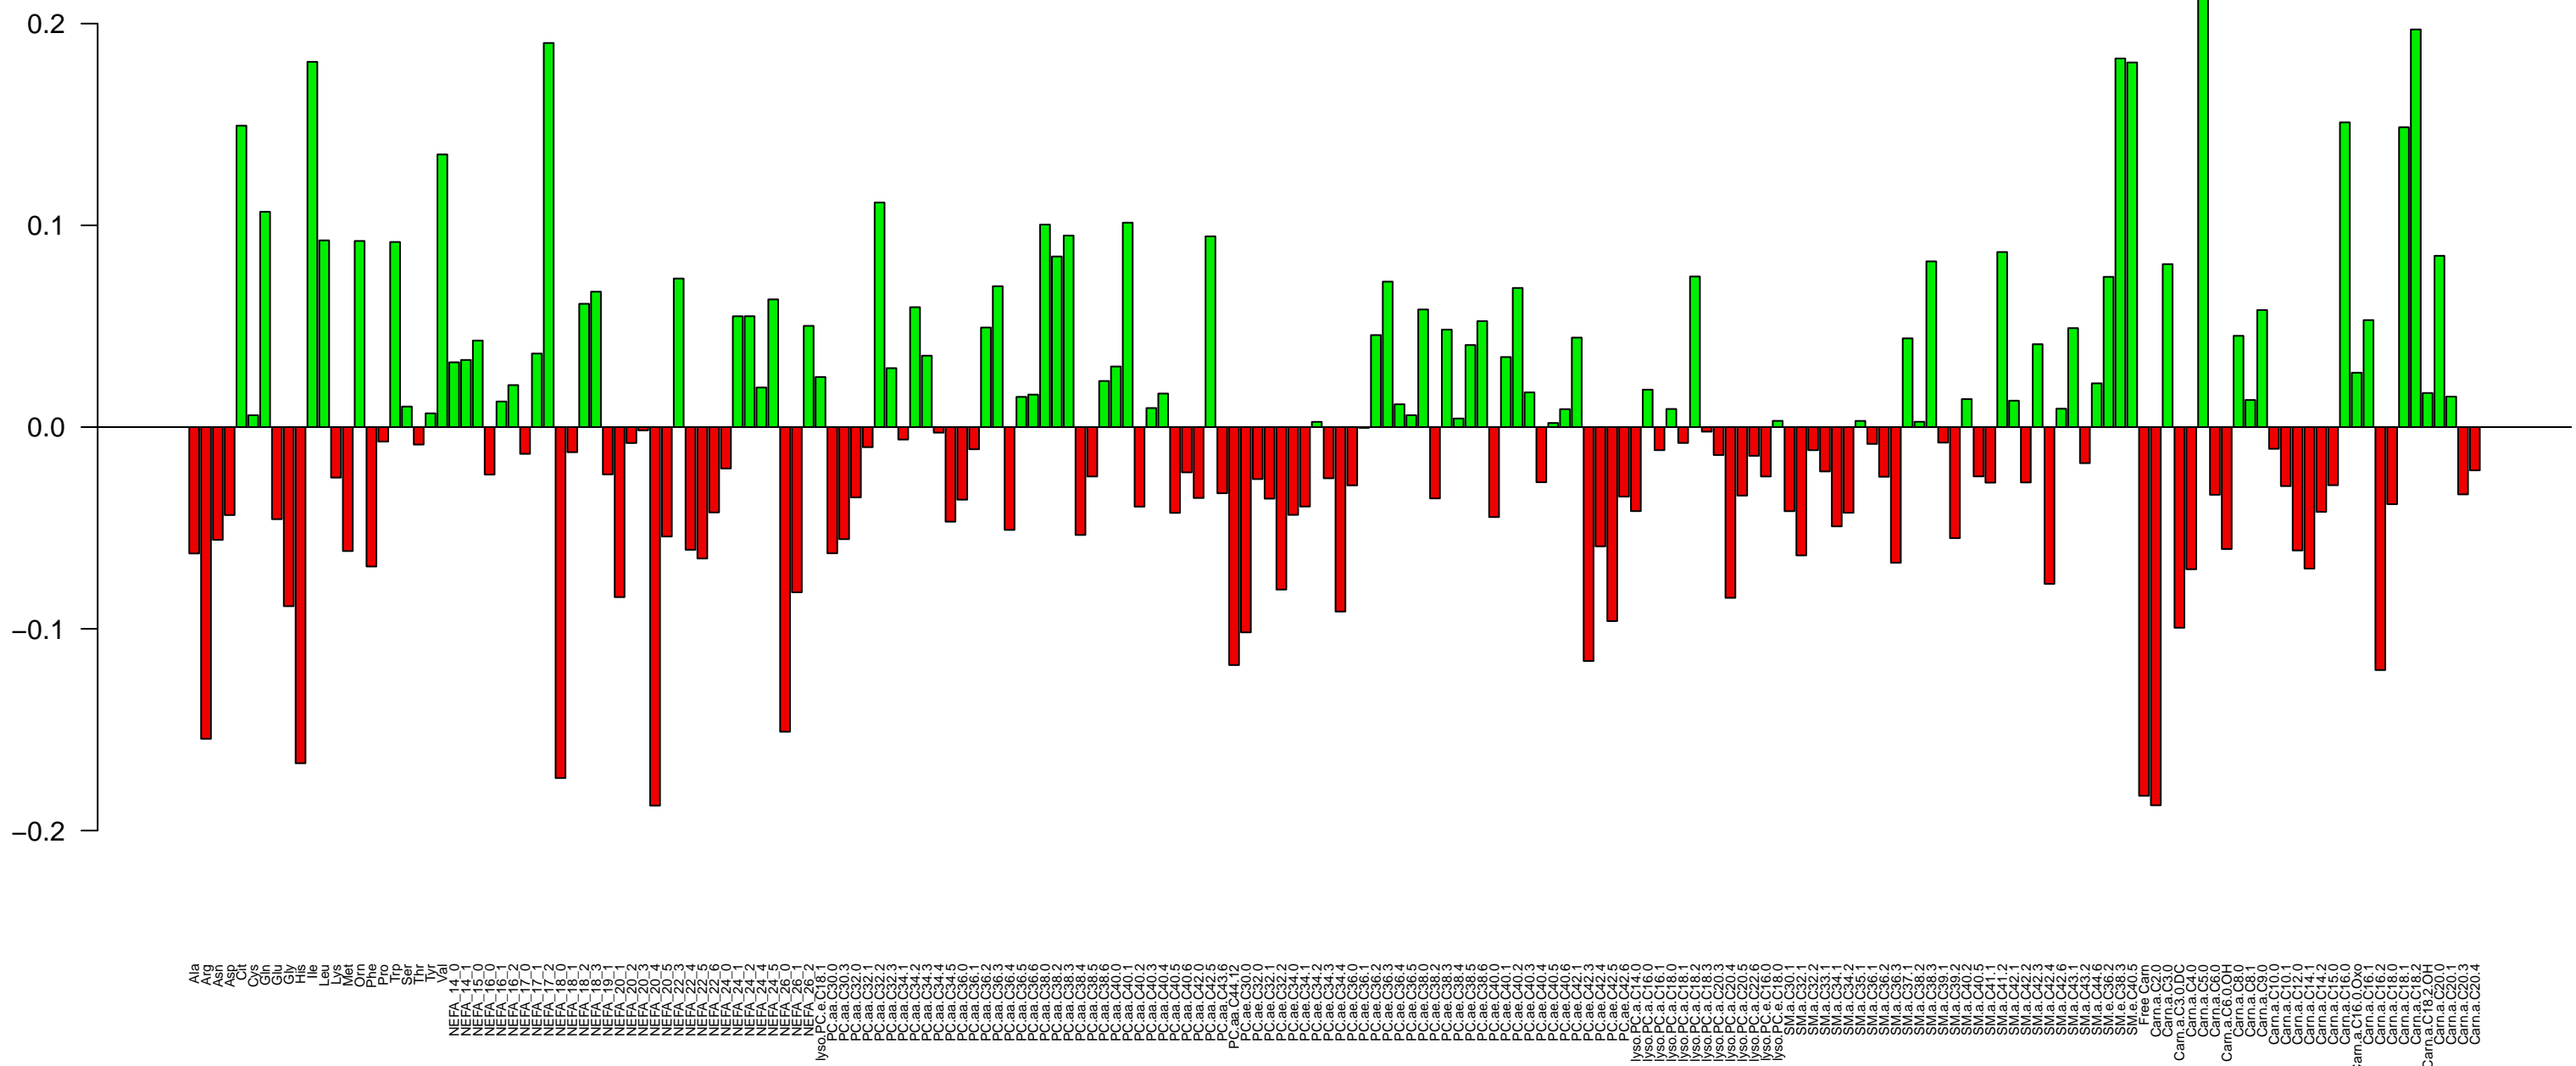

Supplement: 11306_2020_1667_MOESM7_ESM.pdf [file 11306_2020_1667_MOESM7_ESM.pdf]
