# Supplementary material for: A population-based resource for intergenerational metabolomics analyses in pregnant women and their children: the Generation R Study
Source: PubMed Central journal article supplement (PMC7089886; doi:10.1007/s11306-020-01667-1), 2020-03-23
Supplement: 11306_2020_1667_MOESM11_ESM.pdf [file 11306_2020_1667_MOESM11_ESM.pdf]

**Figure S7. Heatmap of median absolute correlation of individual metabolites within and between metabolite groups by time point, stratified by child's sex**

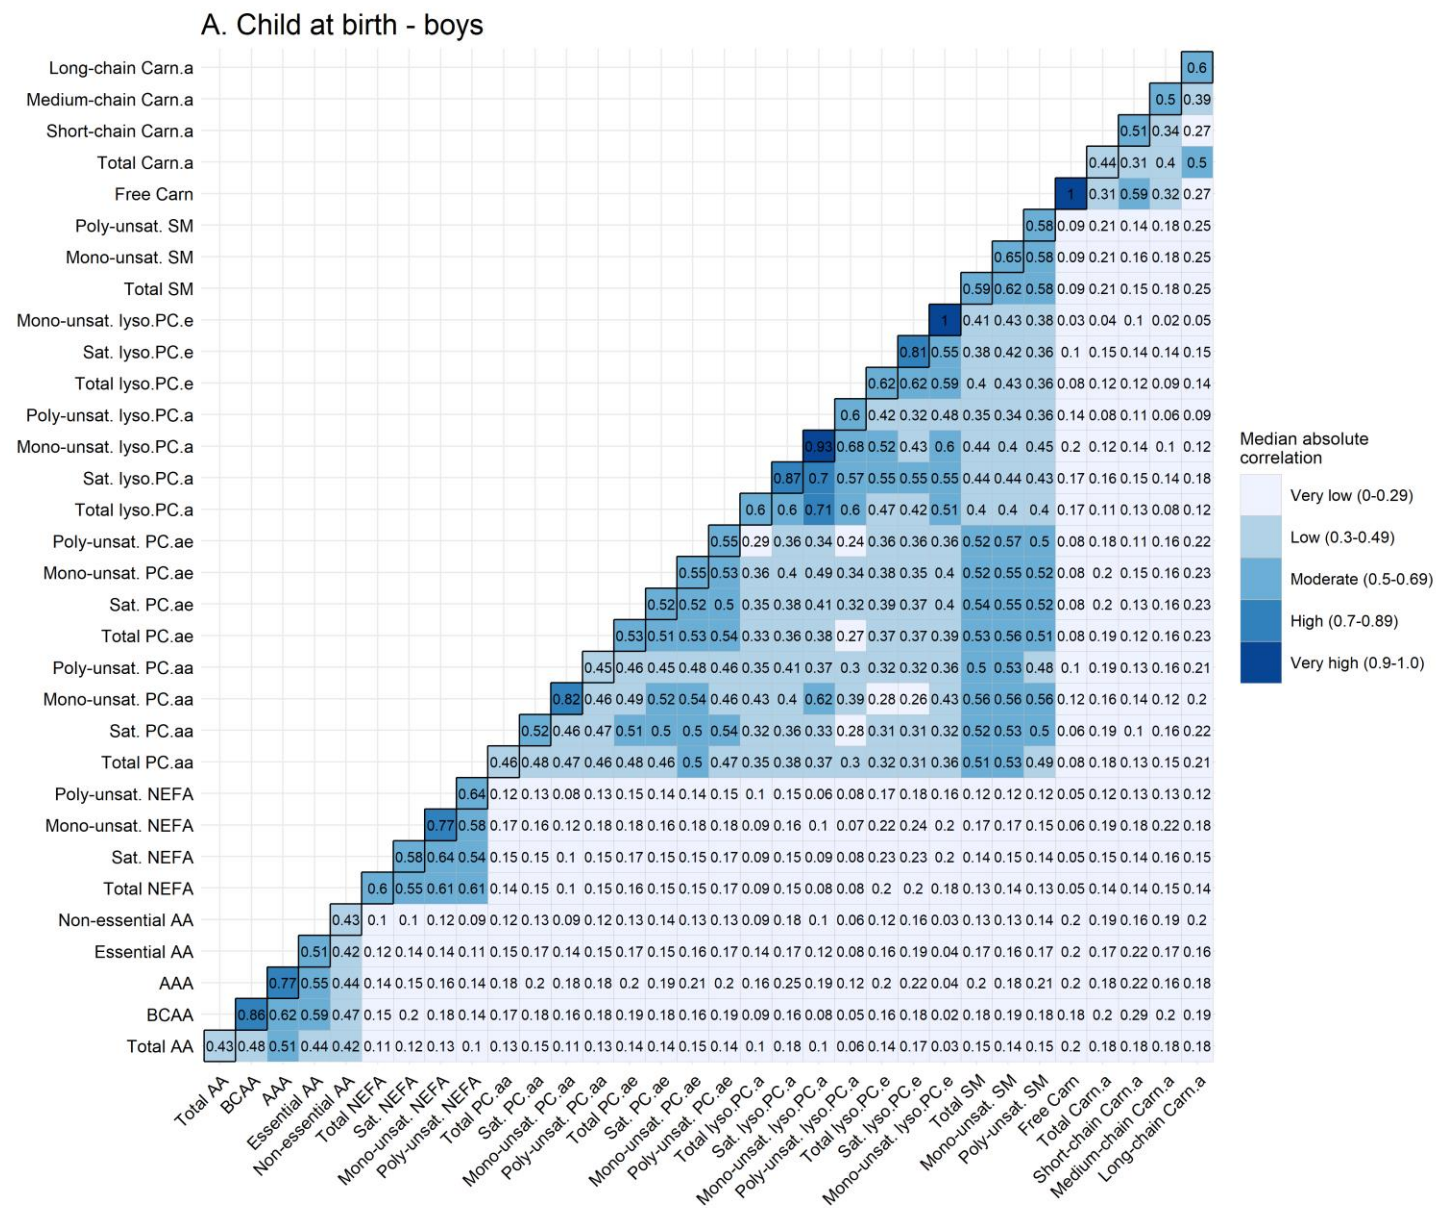

Values represent median absolute correlation coefficients of individual metabolite concentrations within metabolite groups (diagonal) and between metabolite groups (off-diagonal), stratified by child's sex. Mono-unsaturated lyso.PC.e, saturated SM and Free Carn include 1 metabolite, resulting in a correlation coefficient of 1 for within-group correlations. For child at birth, no data on saturated SM is available.

AA: amino acids, BCAA: branched-chain amino acids, AAA: aromatic amino acids, NEFA: non-esterified fatty acids, PC.aa: diacyl-phosphatidylcholines, PC.ae: acyl-alkyl-phosphatidylcholines, Lyso.PC.a: acyl-lysophosphatidylcholines, Lyso.PC.e: alkyl-lysophosphatidylcholines, SM: sphingomyelins, Free Carn: free carnitine, Carn.a: acyl-carnitines, Sat.: Saturated, Unsat.: Unsaturated.





**Figure S7. Heatmap of median absolute correlation of individual metabolites within and between metabolite groups by time point, stratified by child's sex (continued)**

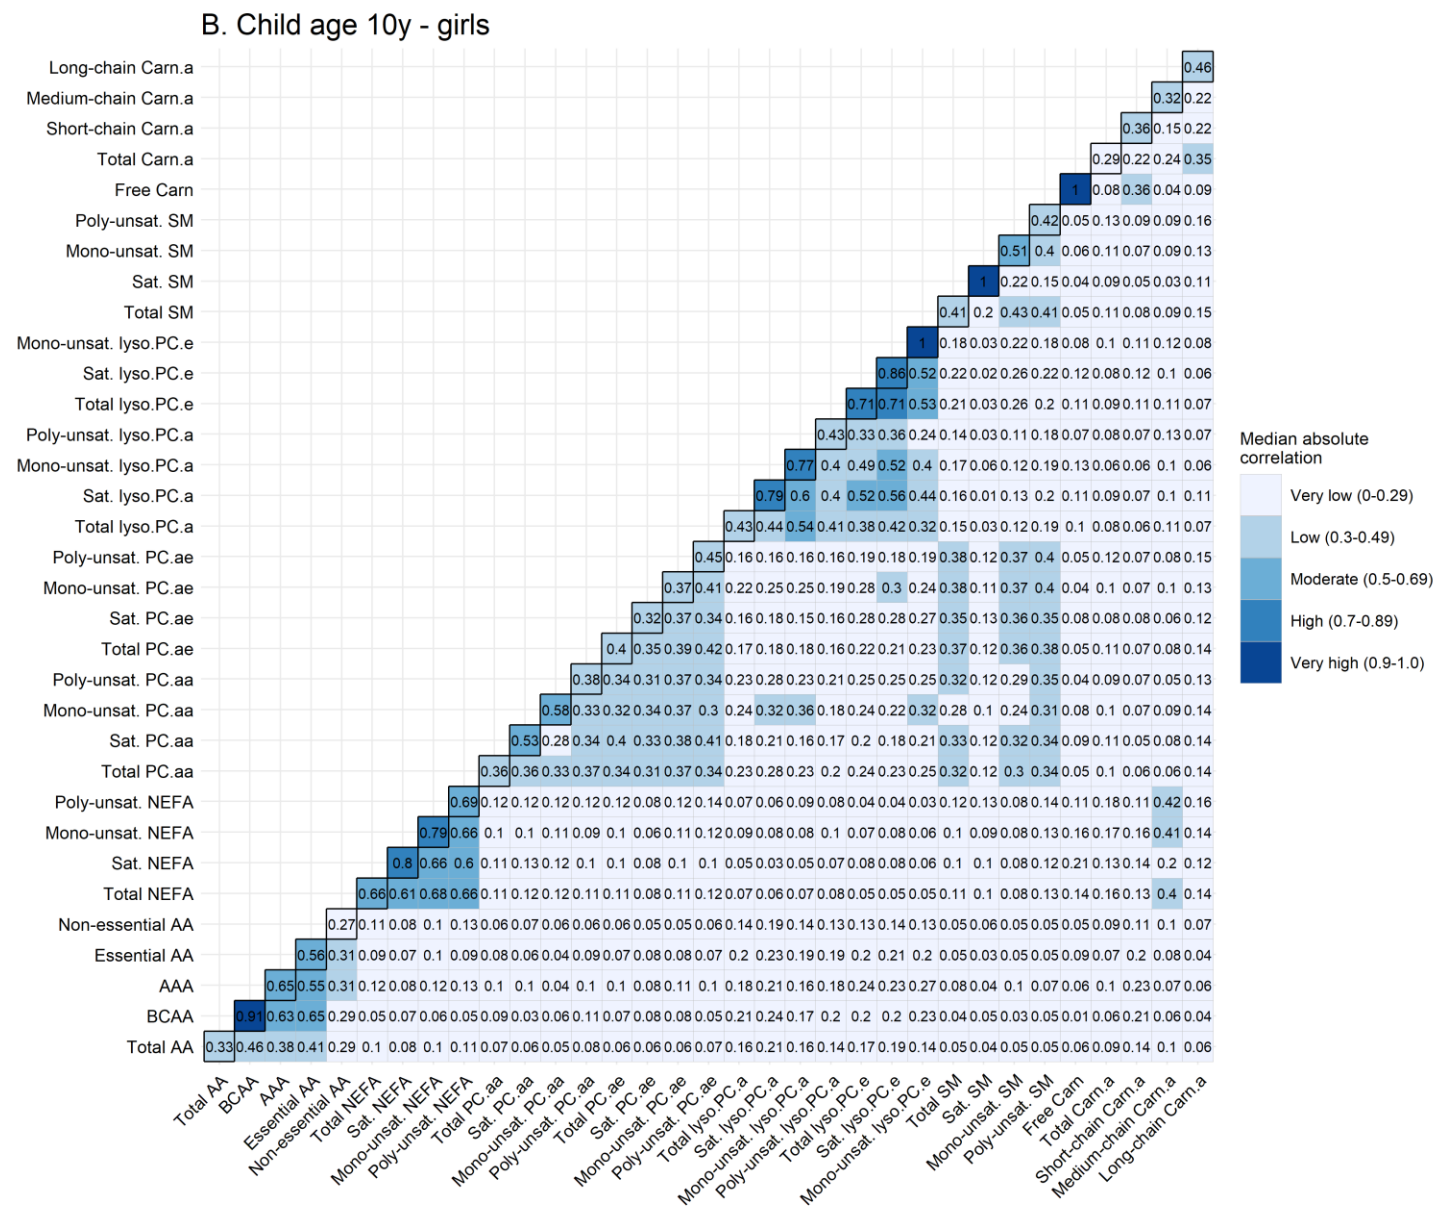

Values represent median absolute correlation coefficients of individual metabolite concentrations within metabolite groups (diagonal) and between metabolite groups (off-diagonal), stratified by child's sex. Mono-unsaturated lyso.PC.e, saturated SM and Free Carn include 1 metabolite, resulting in a correlation coefficient of 1 for within-group correlations. For child at birth, no data on saturated SM is available.

AA: amino acids, BCAA: branched-chain amino acids, AAA: aromatic amino acids, NEFA: non-esterified fatty acids, PC.aa: diacyl-phosphatidylcholines, PC.ae: acyl-alkyl-phosphatidylcholines, Lyso.PC.a: acyl-lysophosphatidylcholines, Lyso.PC.e: alkyl-lysophosphatidylcholines, SM: sphingomyelins, Free Carn: free carnitine, Carn.a: acyl-carnitines, Sat.: Saturated, Unsat.: Unsaturated.
